# Supplementary material
Source: PubMed Central journal article supplement (PMC2652409)
Supplement: ol8004936-File003.pdf [file ol8004936-File003.pdf]

## SUPPORTING INFORMATION

### Diversity Synthesis of Complex Pyridines Yields a Probe of a Key Neurotrophic Signaling Pathway

B. Lawrence Gray, W. Colby Brown, Xiang Wang, Letian Kuai, and Stuart L. Schreiber\*

Department of Chemistry and Chemical Biology

Howard Hughes Medical Institute

Broad Institute of Harvard and MIT

Cambridge, MA 02142, USA

Fax: 617-495-0751

E-mail: stuart\_schreiber@harvard.edu

#### Contents:

|             |                                                                                        |            |
|-------------|----------------------------------------------------------------------------------------|------------|
| <b>I</b>    | <b>General techniques</b>                                                              | <b>S1</b>  |
| <b>II</b>   | <b>Representative characterization data for diyne substrates</b>                       | <b>S2</b>  |
| <b>III</b>  | <b>Optimized cycloisomerization procedures (Table I)</b>                               | <b>S11</b> |
| <b>IV</b>   | <b>Spectral data for Table I</b>                                                       | <b>S13</b> |
| <b>V</b>    | <b>Representative procedures &amp; characterization for pyridines (Tables II, III)</b> | <b>S33</b> |
| <b>VI</b>   | <b>Representative characterization data for other cycloadducts</b>                     | <b>S64</b> |
| <b>VII</b>  | <b>Pyridine regiochemistry proofs</b>                                                  | <b>S65</b> |
| <b>VIII</b> | <b>Experimental Procedures for Screening Experiments</b>                               | <b>S66</b> |
| <b>IX</b>   | <b>Screening Data of 25 Pyridines against PC12 Cells Expressing Exogenous ErbB4</b>    | <b>S67</b> |
| <b>X</b>    | <b>Structures of compounds screened against PC12 Cells Expressing Exogenous ErbB4</b>  | <b>S70</b> |
| <b>XI</b>   | <b>Dose response curve for the compound with the highest inhibitory activity</b>       | <b>S71</b> |

**General techniques.** Except as otherwise noted, reactions were carried out under nitrogen with dry, freshly purified solvents. Tetrahydrofuran was purified by passage through a column of activated alumina (A-2) and supported copper redox catalyst (Q-5 reactant). All other solvents were obtained from Aldrich. All solvents were degassed by vigorous bubbling of a stream of argon for 20 min immediately prior to use, or alternatively, by repeated freeze-pump-thaw cycles in liquid nitrogen under an atmosphere of argon. NMR spectra were recorded at 500 or 300 MHz for all compounds using Varian I-500 and Bruker Biospin 300 instruments. <sup>1</sup>H NMR chemical shifts are reported relative to residual CHCl<sub>3</sub> (7.26 ppm). <sup>13</sup>C NMR data were recorded at 125 or 75 MHz for all compounds using Varian I-500 or Bruker Biospin 300 MHz instruments, respectively. <sup>13</sup>C chemical shifts are reported relative to the central line of CDCl<sub>3</sub> (77.0 ppm). Infrared spectra were recorded using a Perkin-Elmer FT-IR spectrometer (thin film or neat, as indicated). Mass spectra were obtained with JEOL AX 505, JEOL SX-102 and Micromass ESI-LCT spectrometers. Nitriles were obtained from Aldrich and used as received. NMO, TMAO, triphenylphosphine, dppp, and cyclooctadiene were obtained from Aldrich and used as received. Cyclopentadienylcobalt dicarbonyl was obtained from Strem Chemicals and stored at – 10 °C under argon in the dark. All other catalysts were obtained commercially and used as received.

#### Representative procedure for silyl ether formation:

1-octyne (1.00 g, 9.07 mmol) was weighed into a flame-dried round-bottom flask equipped with magnetic stirrer and dissolved in THF (9.0 ml). The solution was cooled to – 78 °C and a 2.5 M *n*-BuLi solution in hexanes (3.62 ml, 9.07 mmol) was introduced dropwise. After 45 min, chlorodiiisopropylsilane (1.55 ml, 9.07 mmol) was added dropwise, and the mixture warmed to ambient temperature. After 20 hours, the solution was diluted with Et<sub>2</sub>O (9.0 ml) and quenched with a saturated solution of NH<sub>4</sub>Cl (18.0 ml). Extraction was carried out using Et<sub>2</sub>O, and combined organics were washed using saturated aqueous NaCl and H<sub>2</sub>O. Drying over MgSO<sub>4</sub> and concentration afforded diisopropyl(oct-1-ynyl)silane (1.97 g, 8.78 mmol, 97%) which was used without further purification. Diisopropyl(oct-1-ynyl)silane (250 mg, 1.11 mmol) was moved to a tapered flask equipped with magnetic stirrer and dissolved in CH<sub>2</sub>Cl<sub>2</sub> (2.5 ml). *N*-bromosuccinimide (198 mg, 1.11 mmol) was slowly introduced in 10-15 mg portions to the rapidly stirring solution, giving a pale yellow solution that was maintained under argon for 30 min and then added to a stirring solution of (*R*)-1-phenylprop-2-yn-1-ol (132 mg, 1.00 mmol), triethylamine (155 μl, 1.10 mmol), and 4-dimethylaminopyridine (13 mg, 0.10 mmol, 10 mol %) in CH<sub>2</sub>Cl<sub>2</sub> (2.0 ml). After 12 h, the solution was concentrated and the crude mixture purified by silica chromatography using an *Isco Combiflash* 40 g

### Supporting Information, page 2

column with 20:1 hexanes:EtOAc as eluant to give (*R*)-diisopropyl(oct-1-ynyl)(1-phenylprop-2-ynyloxy)silane (249 mg, 0.70 mmol, 63%) as a clear oil. Other diynes used in this study were prepared by replacing 1-octyne with with desired acetylene and (*R*)-1-phenylprop-2-yn-1-ol with the desired alcohol.

### Characterization data for diyne substrates:

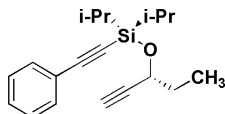

**Diisopropyl(pent-1-yn-3-yloxy)(phenylethynyl)silane (I).**  $^1\text{H}$  NMR (500 MHz,  $\text{CDCl}_3$ )  $\delta$  7.51-7.49 (m, 2 H); 7.37-7.30 (m, 3 H); 4.63 (dt,  $J = 6.50, 2.50$ , 1 H); 2.42 (d,  $J = 2.05$ , 1 H); 1.81-1.75 (m, 2 H); 1.17-1.06 (m, 14 H); 1.03 (t,  $J = 7.00$ , 3 H);  $^{13}\text{C}$  NMR (75 MHz,  $\text{CDCl}_3$ )  $\delta$  132.1, 128.8, 128.6, 128.3, 122.8, 107.4, 88.3, 85.1, 72.0, 65.3, 31.4, 18.5, 18.3, 17.3, 17.2, 17.1, 17.1, 13.6, 13.2, 12.9, 10.9, 9.3; IR (film): 3308, 2944, 2896, 2868, 2154, 1490, 1462, 1351, 1225, 1113, 1064, 1022, 987, 882, 826, 764, 694, 659, 540  $\text{cm}^{-1}$

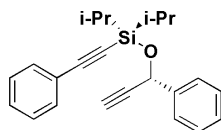

**(*R*)-diisopropyl(2-phenylethynyl)(1-phenylprop-2-ynyloxy)silane (II).**  $^1\text{H}$  NMR (600 MHz,  $\text{CDCl}_3$ )  $\delta$  7.58-7.56 (m, 2 H); 7.50-7.49 (m, 2 H); 7.37-7.29 (m, 6 H); 5.80 (d,  $J = 1.76$ , 1 H); 2.60 (d,  $J = 2.05$ , 1 H); 1.20 (br s, 6 H); 1.13-1.08 (m, 2 H); 1.03-1.02 (m, 6 H);  $^{13}\text{C}$  NMR (100 MHz,  $\text{CDCl}_3$ )  $\delta$  141.0, 132.1, 128.9, 128.3, 127.9, 126.5, 122.6, 108.0, 88.0, 84.3, 73.8, 65.9, 17.2, 17.1, 17.1, 13.5, 13.0; IR (film): 3308, 2951, 2860, 2154, 1484, 1456, 1064, 987, 959, 882, 826, 764, 700, 652, 526, 463  $\text{cm}^{-1}$

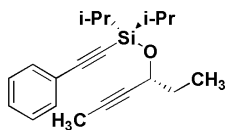

**(hex-4-yn-3-yloxy)diisopropyl(2-phenylethynyl)silane (III).**  $^1\text{H}$  NMR (600 MHz,  $\text{CDCl}_3$ )  $\delta$  7.50 (dd,  $J = 7.91, 1.46$ , 2 H); 7.36-7.30 (m, 3 H); 4.60-4.57 (m, 1 H); 1.84 (dd,  $J = 6.74, 2.05$ , 3 H); 1.77-1.71 (m, 2 H); 1.16 (d,  $J = 4.93$ , 6 H); 1.14-1.08 (m, 8 H); 1.01 (t,  $J = 7.32$ , 3 H);  $^{13}\text{C}$  NMR (100 MHz,  $\text{CDCl}_3$ )  $\delta$  132.1, 128.7, 128.2, 122.9, 107.0, 88.6, 80.5, 80.1, 65.7, 31.8, 17.2, 17.2, 17.1, 13.6, 12.9, 9.5, 3.6; IR (film): 3322, 3077, 3035, 2937, 2868, 2176, 2120, 1700, 1602, 1462, 1386, 1281, 1197, 1064, 987, 924, 882, 833, 736, 694  $\text{cm}^{-1}$

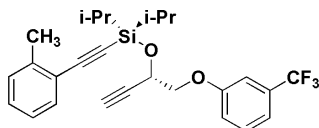

**diisopropyl(2-*o*-tolylethynyl)(1-(3-(trifluoromethyl)phenoxy)but-3-yn-2-yloxy)silane (IV).**  $^1\text{H}$  NMR (500 MHz,  $\text{CDCl}_3$ )  $\delta$  7.43 (d,  $J = 7.32$ , 1 H); 7.32 (t,  $J = 7.81$ , 1 H); 7.26-7.08 (m, 6 H); 5.10-5.07 (m, 1 H); 4.20-4.13 (m, 2 H); 2.50 (s, 1 H); 2.45 (s, 3 H); 1.16-1.15 (m, 6 H); 1.11-1.09 (m, 8 H);  $^{13}\text{C}$  NMR (100 MHz,  $\text{CDCl}_3$ )  $\delta$  158.6, 140.8, 132.6, 129.9, 129.4, 129.0, 125.5, 122.3, 118.1, 117.7, 117.7, 111.6, 111.6, 106.9, 91.4, 81.8, 73.8, 71.9, 63.1, 20.8, 17.1, 17.0, 17.0, 13.4, 13.0; IR (film): 3309, 2948, 2891, 2865, 2148, 1591, 1491, 1448, 1330, 1300, 1243, 1170, 1117, 1065, 1048, 996, 970, 883, 848, 791, 756, 696, 661, 522, 456  $\text{cm}^{-1}$

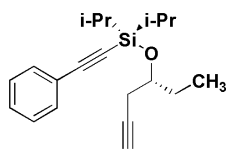

**(hex-5-yn-3-yloxy)diisopropyl(phenylethynyl)silane (V).** NMR (500 MHz, CDCl<sub>3</sub>) δ 7.51-7.48 (m, 2 H); 7.36-7.30 (m, 3 H); 4.07-4.03 (m, 1 H); 2.53 (ddd, *J* = 16.50, 4.25, 2.50, 1 H); 2.44 (ddd, *J* = 16.75, 7.00, 3.00, 1 H); 1.98 (t, *J* = 2.50, 1 H); 1.82-1.74 (m, 1 H); 1.70-1.62 (m, 1 H); 1.17-1.04 (m, 14 H); 0.96 (t, *J* = 8.00, 3 H); <sup>13</sup>C NMR (100 MHz, CDCl<sub>3</sub>) δ 132.1, 128.7, 128.3, 122.9, 107.1, 89.0, 81.5, 73.2, 69.8, 29.7, 28.8, 26.3, 18.5, 18.3, 17.3, 17.3, 17.2, 13.4, 10.9, 9.3; IR (neat): 3309, 2965, 2952, 2896, 2865, 2157, 1496, 1465, 1391, 1365, 1252, 1226, 1113, 1070, 1035, 996, 943, 922, 887, 826, 761, 691, 648, 530 cm<sup>-1</sup>

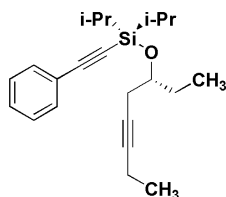

**diisopropyl(oct-5-yn-3-yloxy)(phenylethynyl)silane (VI).** NMR (500 MHz, CDCl<sub>3</sub>) δ 7.50 (app dd, *J* = 7.75, 1.50, 2 H); 7.35-7.30 (m, 3 H); 4.02-3.97 (m, 1 H); 2.50-2.46 (m, 1 H); 2.39-2.34 (m, 1 H); 2.16-2.12 (m, 2 H); 1.79-1.72 (m, 2 H); 1.66-1.59 (m, 3 H); 1.12-1.08 (m, 14 H); 0.96 (t, *J* = 8.00, 3 H); <sup>13</sup>C NMR (100 MHz, CDCl<sub>3</sub>) δ 132.1, 128.6, 128.2, 123.0, 106.9, 89.3, 83.1, 73.8, 29.0, 26.7, 18.5, 18.3, 17.3, 17.3, 14.2, 13.9, 13.4, 13.2, 12.5, 10.9, 9.3; IR (neat): 2965, 2935, 2874, 2161, 1487, 1461, 1383, 1317, 1248, 1209, 1109, 1070, 1030, 991, 926, 883, 830, 756, 687, 648, 535, 487 cm<sup>-1</sup>

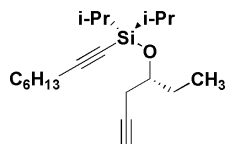

**(hex-5-yn-3-yloxy)diisopropyl(oct-1-ynyl)silane (VII).** NMR (500 MHz, CDCl<sub>3</sub>) δ 3.98-3.95 (m, 1 H); 2.48 (ddd, *J* = 16.50, 4.50, 3.00, 1 H); 2.38 (ddd, *J* = 16.88, 7.50, 3.00, 1 H); 2.26 (t, *J* = 7.00, 2 H); 1.96 (t, *J* = 3.00, 1 H); 1.77-1.72 (m, 1 H); 1.64-1.59 (m, 1 H); 1.56-1.50 (m, 2 H); 1.45-1.39 (m, 2 H); 1.33-1.27 (m, 4 H); 1.10-1.02 (m, 14 H); 0.93 (t, *J* = 7.00, 3 H); 0.89 (t, *J* = 7.00, 3 H); <sup>13</sup>C NMR (100 MHz, CDCl<sub>3</sub>) δ 132.2, 128.8, 128.2, 122.8, 107.5, 88.0, 81.1, 53.2, 17.2, 17.1, 13.2, 3.6; IR (neat): 3317, 2965, 2930, 2865, 2174, 1470, 1387, 1248, 1113, 1078, 1030, 1009, 987, 935, 887, 839, 813, 739, 678, 635 cm<sup>-1</sup>

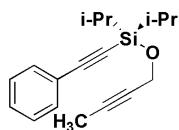

**(but-2-ynyloxy)diisopropyl(phenylethynyl)silane (VIII).** NMR (500 MHz, CDCl<sub>3</sub>) δ 7.51-7.50 (m, 2 H); 7.35-7.32 (m, 3 H); 4.47-4.46 (m, 2 H); 1.85 (t, *J* = 2.00, 3 H); 1.15-1.05 (m, 14 H); <sup>13</sup>C NMR (100 MHz, CDCl<sub>3</sub>) δ 132.2, 128.8, 128.2, 122.8, 107.5, 88.0, 81.1, 53.2, 17.3, 17.2, 17.1, 16.9, 13.2, 3.6; IR (neat): 2952, 2926, 2900, 2870, 2157, 1496, 1461, 1370, 1222, 1252, 1148, 1065, 1000, 930, 874, 835, 752, 691, 657, 530 cm<sup>-1</sup>

**Representative 1-H & 13-C NMR Spectra for Diyne Substrates:**

*Spectra for compounds II, III, & IV:*

*Supporting Information, page 4*

**<sup>1</sup>H and <sup>13</sup>C NMR spectra for silyl ether substrates:**

| <b>page</b> | <b>subst</b> | <b>spectrum</b> | <b>page</b> | <b>subst</b> | <b>spectrum</b> |
|-------------|--------------|-----------------|-------------|--------------|-----------------|
| 5           | <b>II</b>    | 1H              | 8           | <b>III</b>   | 13C             |
| 6           | <b>II</b>    | 13C             | 9           | <b>IV</b>    | 1H              |
| 7           | <b>III</b>   | 1H              | 10          | <b>IV</b>    | 13C             |

BLG-IV-018-F-F  
Data Collected on:  
nmrslr1novo00  
Acquisition directory:  
/export/home/1600/vnmrsys/data  
Sample directory:  
File: BLG-IV-018-F-F\_  
Pulse Sequence: s2pul  
Solvent: CDCl3  
Temp.: 20.0 C / 283.1 K  
Relax. delay 1.000 sec  
Acq. time 2.048 sec  
Width 9596.9 Hz  
8 repetitions  
OBSERVED F1: 50.7760064 MHz  
NUC1: 13C  
Line broadening 0.1 Hz  
FT size 65536  
Total time 0 min

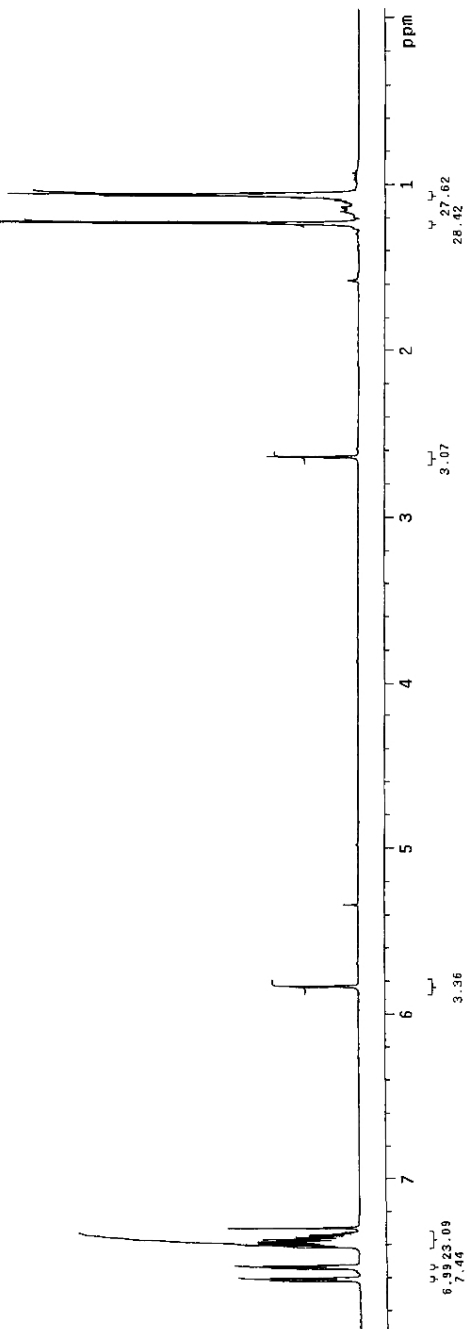

BLG-IV-018-F-F-13C  
Data Collected on:  
mrmrsun2-inova500  
Archive directory:  
/export/home/dsz/vnmr-sys/data  
Sample directory:  
File: BLG-IV-018-F-F-13C  
Pulse Sequence: s2pu1  
Solvent: CDCl3  
Temp: 22.0 C / 295.1 K  
Pulse 38.4 degrees  
Acq. time 1.311 sec  
Width 25000.0 Hz  
928 repetitions  
OBSERVE C13, 100.5806089 MHz  
DECOUPLE H1, 400.0040902 MHz  
Power 51 dB  
CONTINUOUSLY  
WALTZ16  
DATA PROCESSING  
Line broadening 1.0 Hz  
FT size 65536  
Total time 22 min

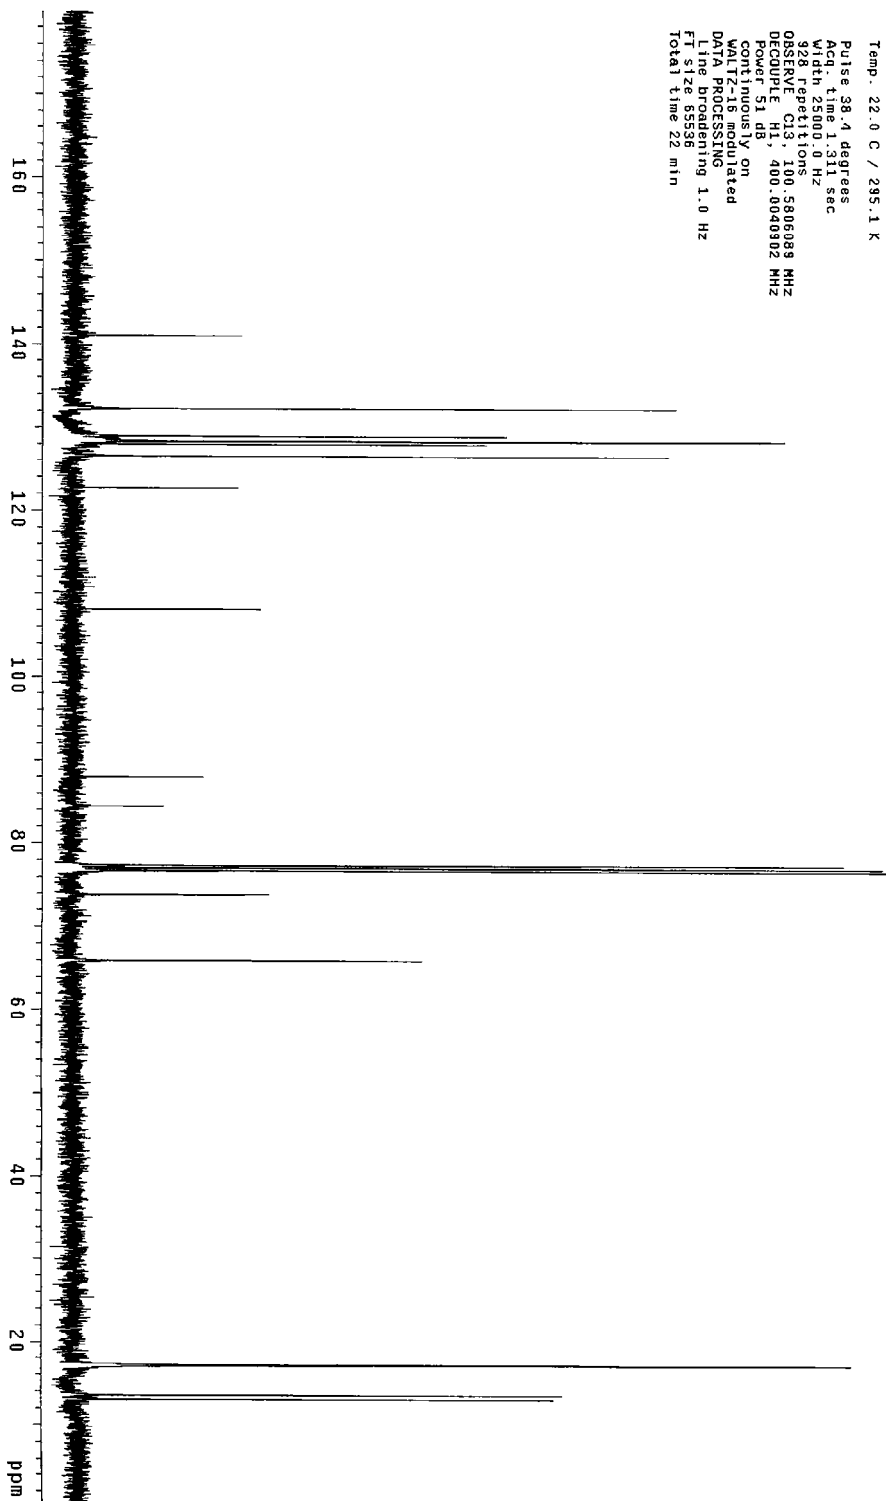

BLG-IV-018-H-F  
Data Collected on:  
nmrSun-inovae000  
Archive directory:  
/export/home/1600/vnmr-sys/data  
Sample directory:  
File: BLG-IV-018-H-F  
Pulse Sequence: s2pu1  
Solvent: CDCl3  
Temp. 20.0 C / 293.1 K  
Relax. delay 1.000 sec  
Pulse 45.0 degrees  
Acq. time 2.048 sec  
Width 9596.9 Hz  
8 repetitions  
OBSERVE H1, 589.7764289 MHz  
DATA PROCESSING  
Line broadening 0.1 Hz  
F1 size 85956  
Total time 0 min

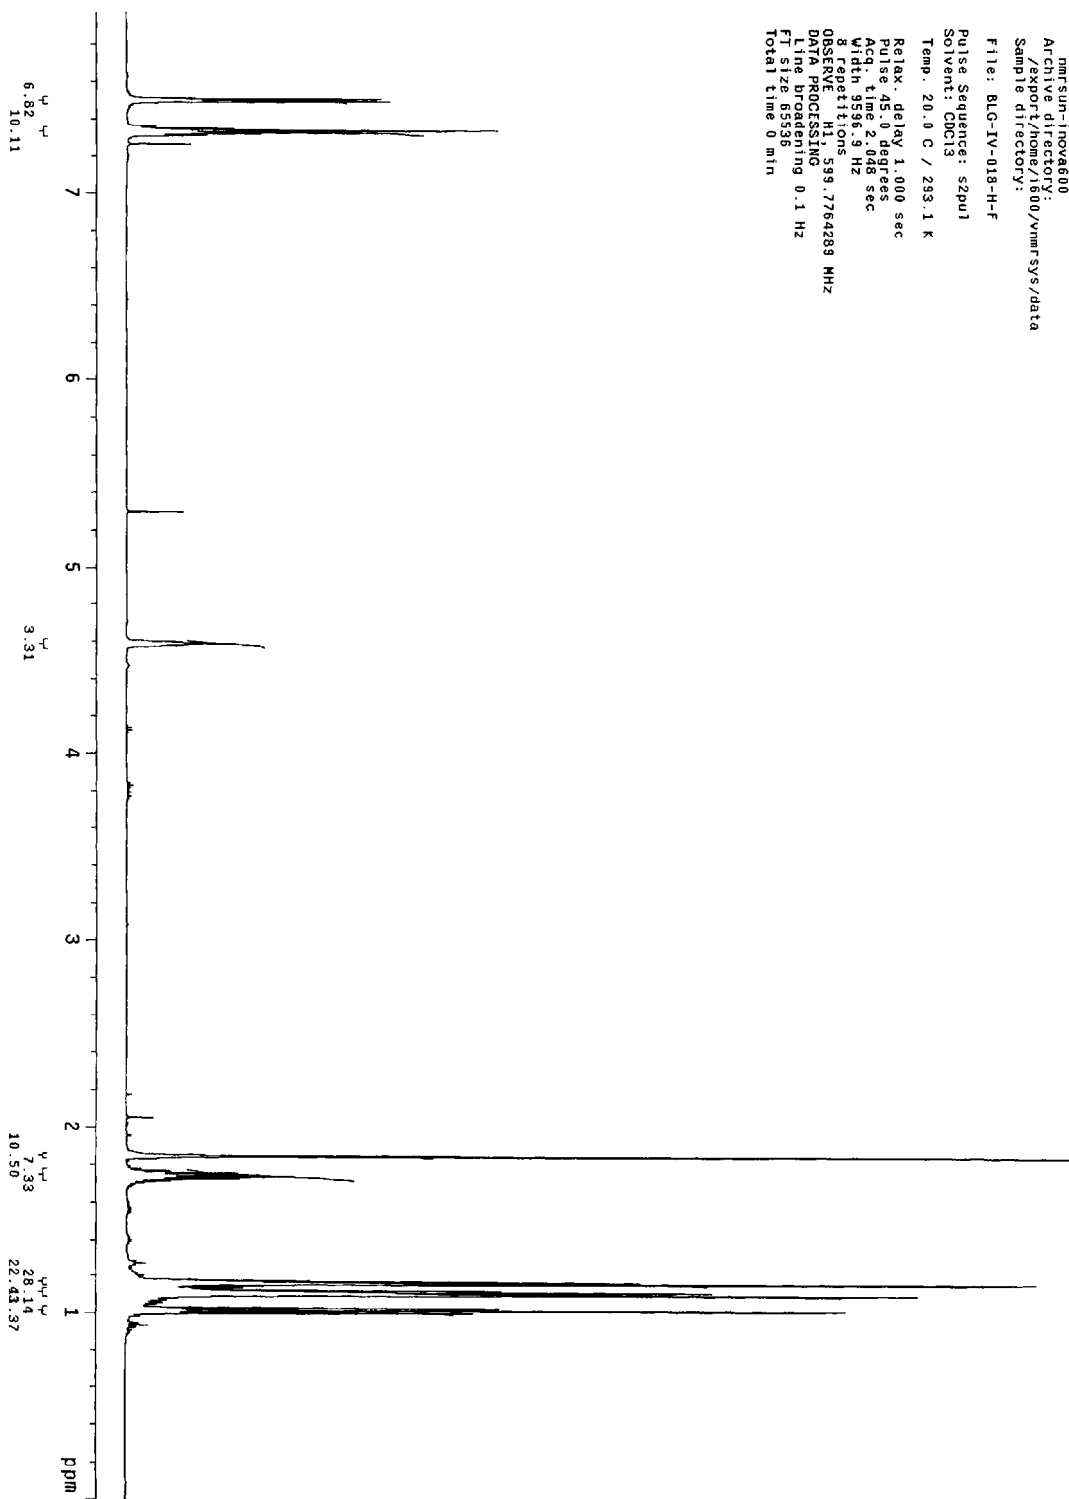

BLG-IV-018-H-F-13C  
Data Collected on:  
nmrsum2-1nov0500  
Archive directory:  
/export/home/ds2/vmr/sys/data  
Sample directory:  
File: BLG-IV-018-H-F-13C  
Pulse Sequence: s2pu1  
Solvent: CDCl3  
Temp. 25.0 C / 296.1 K  
Pulse 36.7 degrees  
Acq time 1.31 sec  
Width 23980.8 Hz  
624 repetitions  
OBSERVE C13, 100.539018 MHz  
DECUPLE H1, 399.8385669 MHz  
Power 47 dB  
Continuously on  
WALTZ16 modulated  
D1 5.00 sec  
Line Broadening 1.0 Hz  
FT size 65536  
Total time 22 min

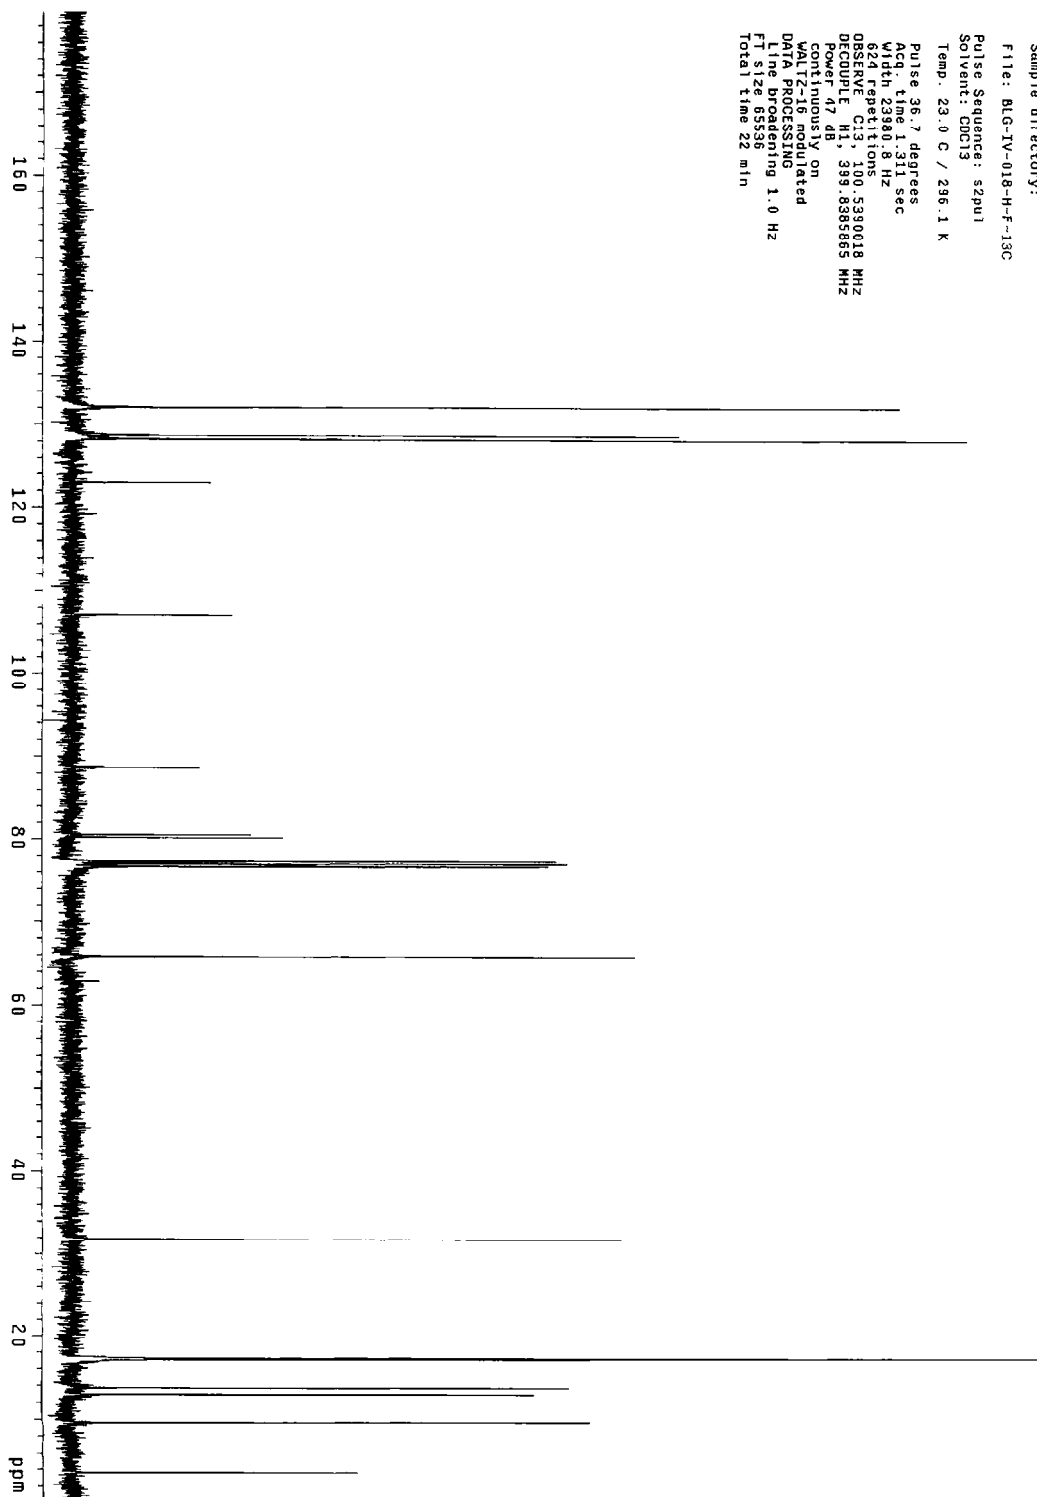



BLG-IV-018-L-F  
Data Collected on:  
nmrsun2-inova500  
ATC:\Users\jrc\My Documents\NMR\Export\heme\heme2\vmrnsys\data  
Sample directory:  
File: CH-BLG-IV-018-L-F  
Pulse Sequence: s2pul  
Solvent: CDC13  
Temp.: 23.0 C / 296.1 K  
Relax. delay: 0.200 sec  
Pulse: 8.0 degrees  
Width: 2.000 sec  
Sweep rate: 8000.0 Hz  
16 repetitions  
OBSERVE F1: 499.7479268 MHz  
DATA PROCESSING  
Time: 0.1 Hz  
FT size 32768  
Total time 0 min

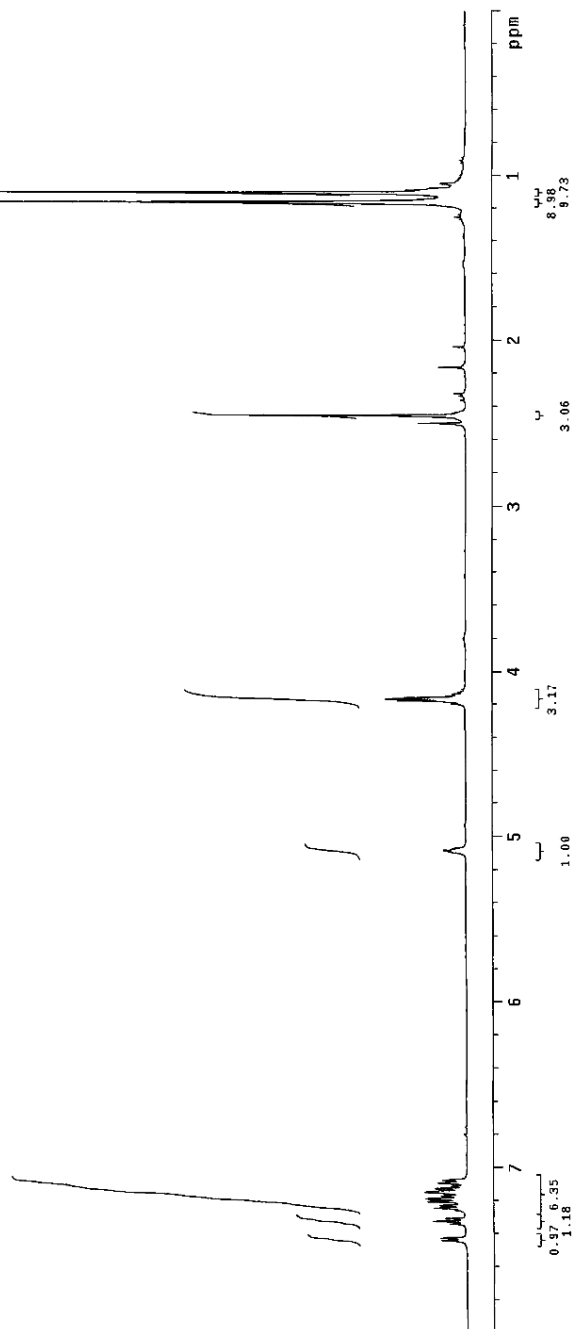

BLG-IV-018-L-F-13C  
Data Collected on:  
nmrsum2-1nov0500  
Acquisition directory:  
/export/home/ds2/vnmrsys/data  
Sample directory:  
File: CH-BLG-IV-018-L-F-13C  
Pulse Sequence: s2pu1  
Solvent: CDCl3  
Temp: 23.0 C / 296.1 K  
User: 1-14-87  
Pulse 41.5 degrees  
Acq time 1.632 sec  
Width 23966.3 Hz  
1000 repetitions  
OBSERVE C13, 125.967153 MHz  
PULPROG zgpg30  
Power 94 dB, 493.7504192 MHz  
continuously on  
WALTZ-16 modulated  
DATA PROCESSING  
SOLVENT DECOUPLING 1.0 Hz  
FT size 65536  
Total time 18 min

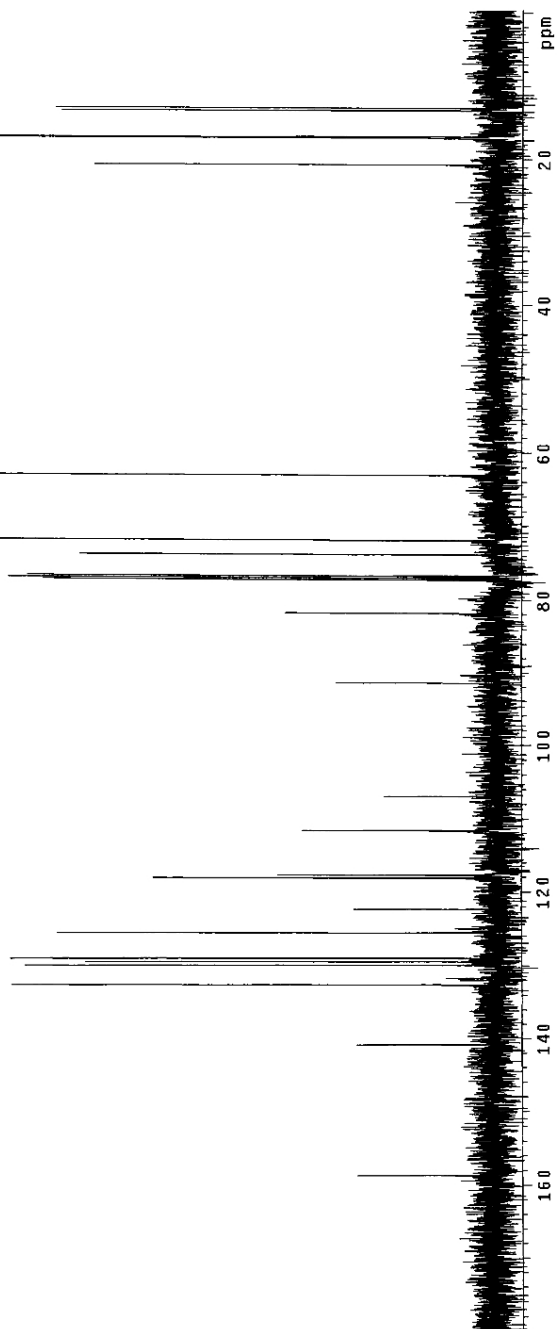

### Supporting Information, page 11

#### Procedure for optimization of cycloisomerization (Table I):

Diisopropyl(pent-1-yn-3-yloxy)(phenylethynyl)silane **1** (10.0 mg, 0.033 mmol) was placed into an oven-dried sealed tube equipped with magnetic stirrer and dissolved in degassed solvent (0.67 ml). 5-methoxy-2-pyridinecarbonitrile (6.7 mg, 0.05 mmol) was added as a solid to the stirring solution. Additives/ligands (0.017 mmol, 50 mol %) were introduced either as solids or minimal solutions in xylenes. After complete dissolution, a solution of cyclopentadienylcobalt(I) dicarbonyl in degassed xylenes (50  $\mu$ l) was introduced by syringe, giving a pale yellow solution. The sealed tube was immediately submerged into an oil bath preheated to 140 °C. After 24 h, the dark brown solution was cooled to ambient temperature and loaded onto a 4 g silica plug. Filtration was performed using an *Isco Combiflash* system using a gradient starting with hexanes and ending with 1/1 hexanes/ethyl acetate (total volume of approximately 40 ml), which effectively removed insoluble cobalt byproducts. Pooled fractions were concentrated *in vacuo* and assayed for conversion by <sup>1</sup>H NMR. Purification was performed by silica gel chromatography using an *Isco Combiflash* 12 g column with 20:1 hexanes:EtOAc as eluant, providing 3-ethyl-1,1-diisopropyl-5-(6-methoxy-pyridin-3-yl)-7-phenyl-1,3-dihydro-[1,2]oxasilolo[3,4-c]pyridine **5** as a clear oil.

#### Optimized procedure for cycloisomerization (Results from Table I):

Reaction sequence used for the generation of **5**:

Diisopropyl(pent-1-yn-3-yloxy)(phenylethynyl)silane **1** (10.0 mg, 0.033 mmol) was placed into an oven-dried sealed tube equipped with magnetic stirrer and dissolved in degassed THF (0.67 ml). 5-methoxy-2-pyridinecarbonitrile (6.7 mg, 0.05 mmol) was added as a solid to the stirring solution. After complete dissolution, a solution of cyclopentadienylcobalt(I) dicarbonyl (1.5 mg, 0.0083 mmol, 25 mol %) in degassed xylenes (50  $\mu$ l) was introduced by syringe, giving a pale yellow solution. The sealed tube was immediately submerged into an oil bath preheated to 140 °C. After 24 h, the dark brown solution was cooled to ambient temperature and loaded onto a 4 g silica plug. Filtration was performed using an *Isco Combiflash* system using a gradient starting with hexanes and ending with 1/1 hexanes/ethyl acetate (total volume of approximately 40 ml), which effectively removed insoluble cobalt byproducts. Pooled fractions were concentrated *in vacuo* and assayed for conversion by <sup>1</sup>H NMR. Purification was performed by silica gel chromatography using an *Isco Combiflash* 12 g column with 20:1 hexanes:EtOAc as eluant, providing 3-ethyl-1,1-diisopropyl-5-(6-methoxy-pyridin-3-yl)-7-phenyl-1,3-dihydro-[1,2]oxasilolo[3,4-c]pyridine **5** (8.8 mg, 0.020 mmol, 61%) as a clear oil.

#### Spectral data for reaction optimization experiments (Table I):

<sup>1</sup>H NMR spectra for entries 1-20:

| page | table I entry | reaction conditions                                                                     | Conversion |
|------|---------------|-----------------------------------------------------------------------------------------|------------|
| S-13 | 1             | CpCo(CO) <sub>2</sub> (100 mol %), xylenes, 140 °C, h $\nu$                             | 50%        |
| S-14 | 2             | CpCo(CO) <sub>2</sub> (25 mol %), xylenes, 140 °C, h $\nu$                              | 17%        |
| S-15 | 3             | CpCo(CO) <sub>2</sub> (25 mol %), dimethoxyethane, 140 °C, h $\nu$                      | 29%        |
| S-16 | 4             | CpCo(CO) <sub>2</sub> (25 mol %), dichloroethane, 140 °C, h $\nu$                       | 69%        |
| S-17 | 5             | CpCo(CO) <sub>2</sub> (25 mol %), 1,4-dioxane, 140 °C, h $\nu$                          | <2%        |
| S-18 | 6             | CpCo(CO) <sub>2</sub> (25 mol %), chlorobenzene, 140 °C, h $\nu$                        | 18%        |
| S-19 | 7             | CpCo(CO) <sub>2</sub> (25 mol %), dichlorobenzene, 140 °C, h $\nu$                      | 8%         |
| S-20 | 8             | CpCo(CO) <sub>2</sub> (25 mol %), pyridine, 140 °C, h $\nu$                             | <2%        |
| S-21 | 9             | CpCo(CO) <sub>2</sub> (25 mol %), lutidene, 140 °C, h $\nu$                             | 8%         |
| S-22 | 10            | CpCo(CO) <sub>2</sub> (25 mol %), trichloroethane, 140 °C, h $\nu$                      | 13%        |
| S-23 | 11            | CpCo(CO) <sub>2</sub> (25 mol %), dimethylacetamide, 140 °C, h $\nu$                    | <2%        |
| S-24 | 12            | CpCo(CO) <sub>2</sub> (25 mol %), 2-methyltetrahydrofuran, 140 °C, h $\nu$              | 80%        |
| S-25 | 13            | CpCo(CO) <sub>2</sub> (25 mol %), THF, 140 °C, h $\nu$                                  | 82%        |
| S-26 | 14            | CpCo(CO) <sub>2</sub> (25 mol %), xylenes, NMO (50 mol %), 140 °C, h $\nu$              | 37%        |
| S-27 | 15            | CpCo(CO) <sub>2</sub> (25 mol %), xylenes, TMAO (50 mol %), 140 °C, h $\nu$             | 57%        |
| S-28 | 16            | CpCo(CO) <sub>2</sub> (25 mol %), xylenes, PPh <sub>3</sub> (50 mol %), 140 °C, h $\nu$ | 54%        |
| S-29 | 17            | CpCo(CO) <sub>2</sub> (25 mol %), xylenes, dppp (50 mol %), 140 °C, h $\nu$             | 40%        |

**Supporting Information, page 12**

|      |    |                                                                       |      |
|------|----|-----------------------------------------------------------------------|------|
| S-30 | 18 | CpCo(CO) <sub>2</sub> (25 mol %), xylenes, cod (50 mol %), 140 °C, hv | 41%  |
| S-31 | 19 | CpCo(CO) <sub>2</sub> (25 mol %), THF, 140 °C                         | >95% |
| S-32 | 20 | CpCo(CO) <sub>2</sub> (25 mol %), THF, 70 °C                          | <2%  |

---

Conversions were determined on the basis of integration between the methine proton H(A) at 4.6 ppm in diisopropyl(pent-1-yn-3-yloxy)(phenylethynyl)silane **1** and the equivalent methine proton H(A) at 5.0 ppm in 3-ethyl-1,1-diisopropyl-5-(6-methoxypyridin-3-yl)-7-phenyl-1,3-dihydro-[1,2]oxasilolo[3,4-c]pyridine **5**.

Solvent: CDCl<sub>3</sub> – Frequency: 300 MHz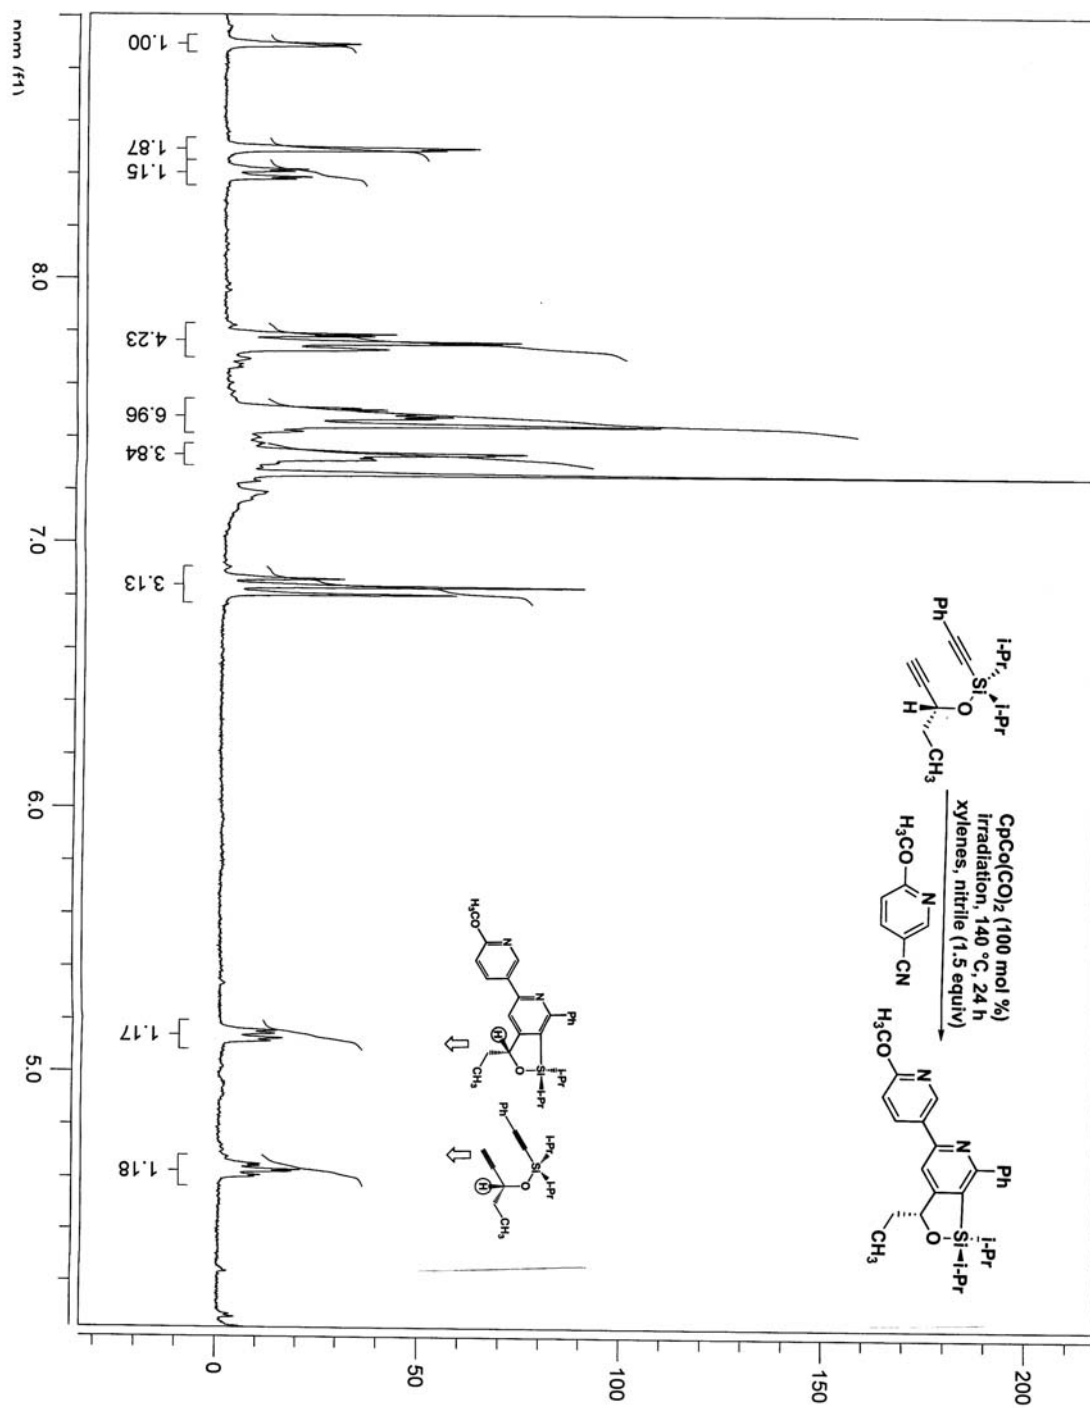

Solvent: CDCl<sub>3</sub> – Frequency: 300 MHz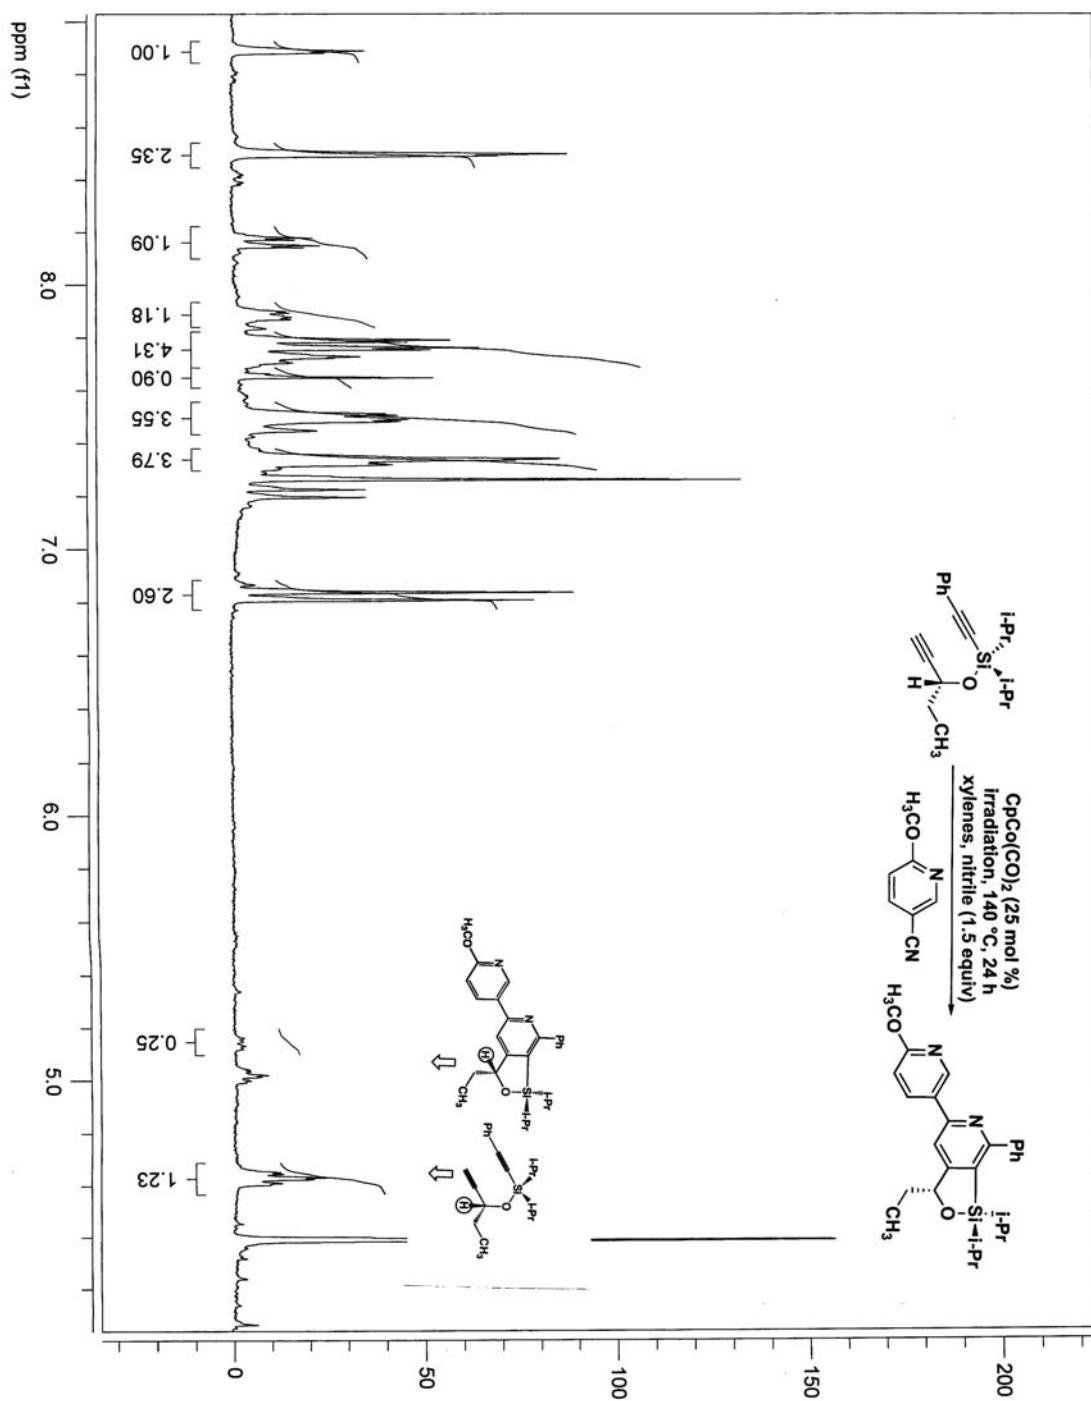

Solvent: CDCl<sub>3</sub> – Frequency: 300 MHz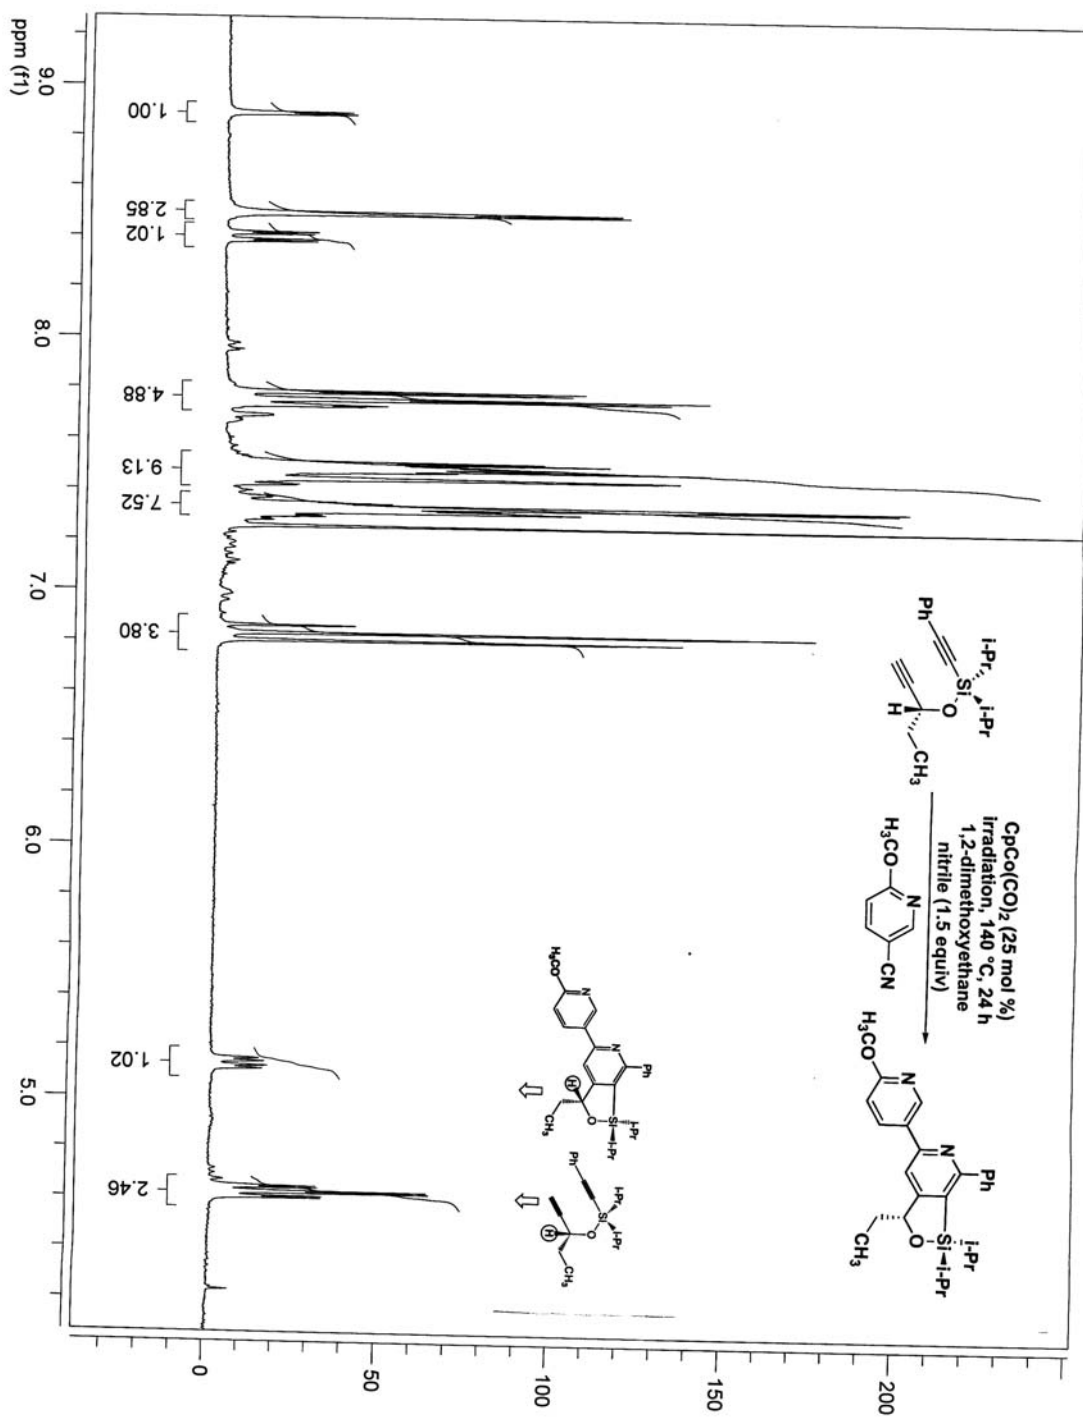

Solvent: CDCl<sub>3</sub> – Frequency: 300 MHz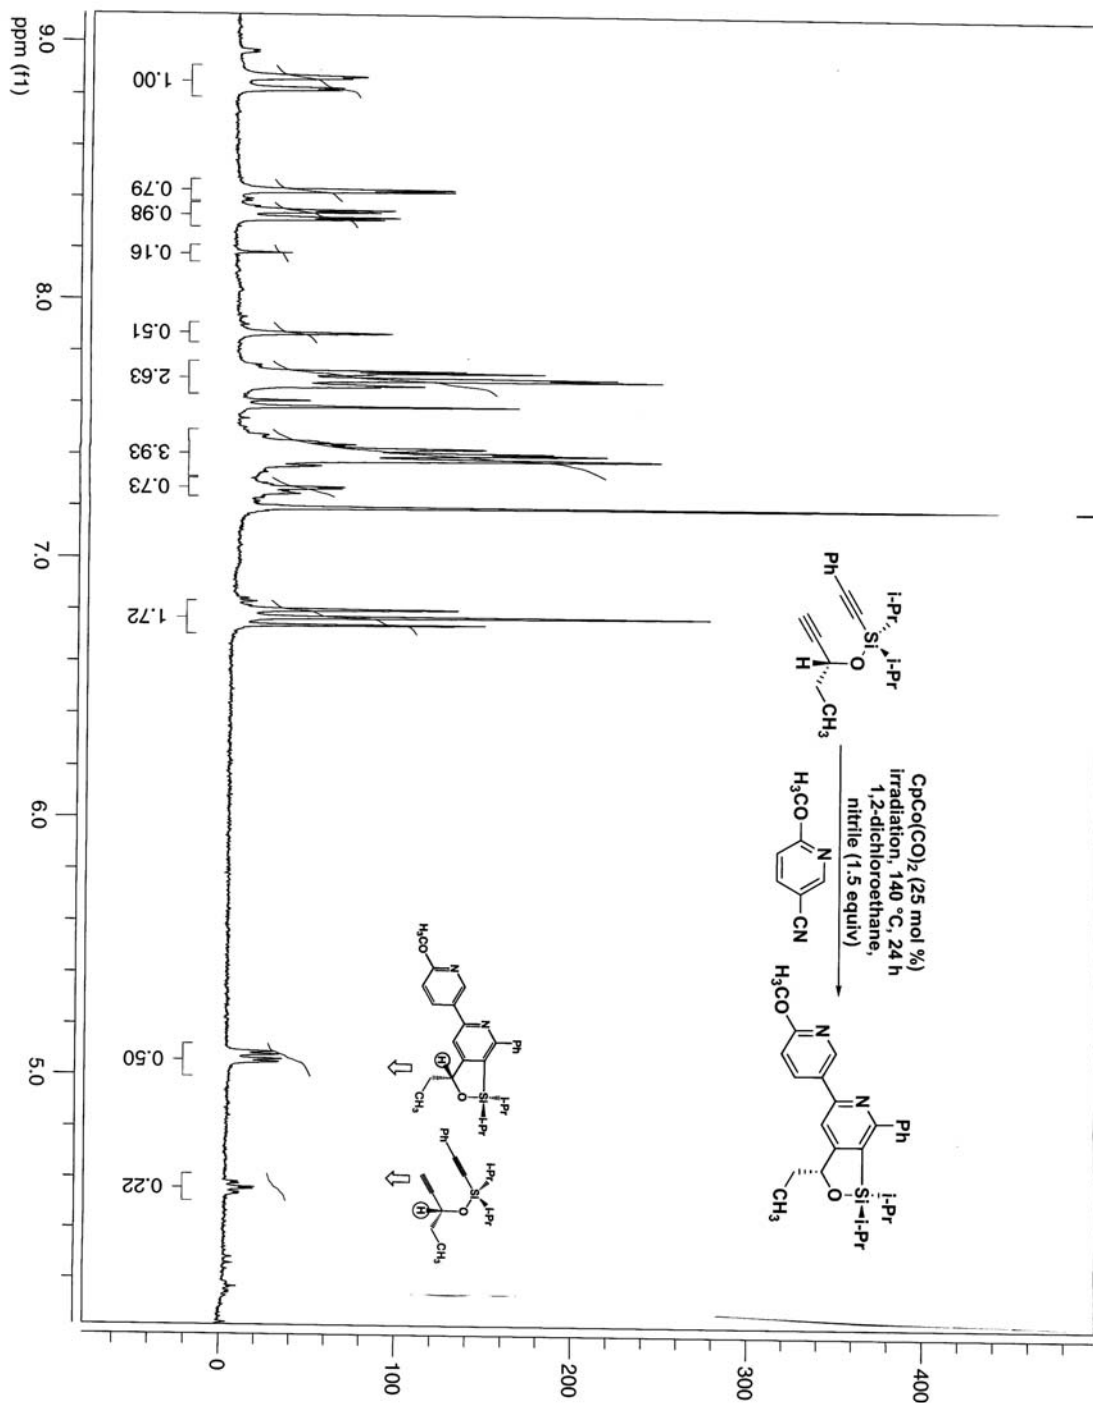



Solvent: CDCl<sub>3</sub> – Frequency: 300 MHz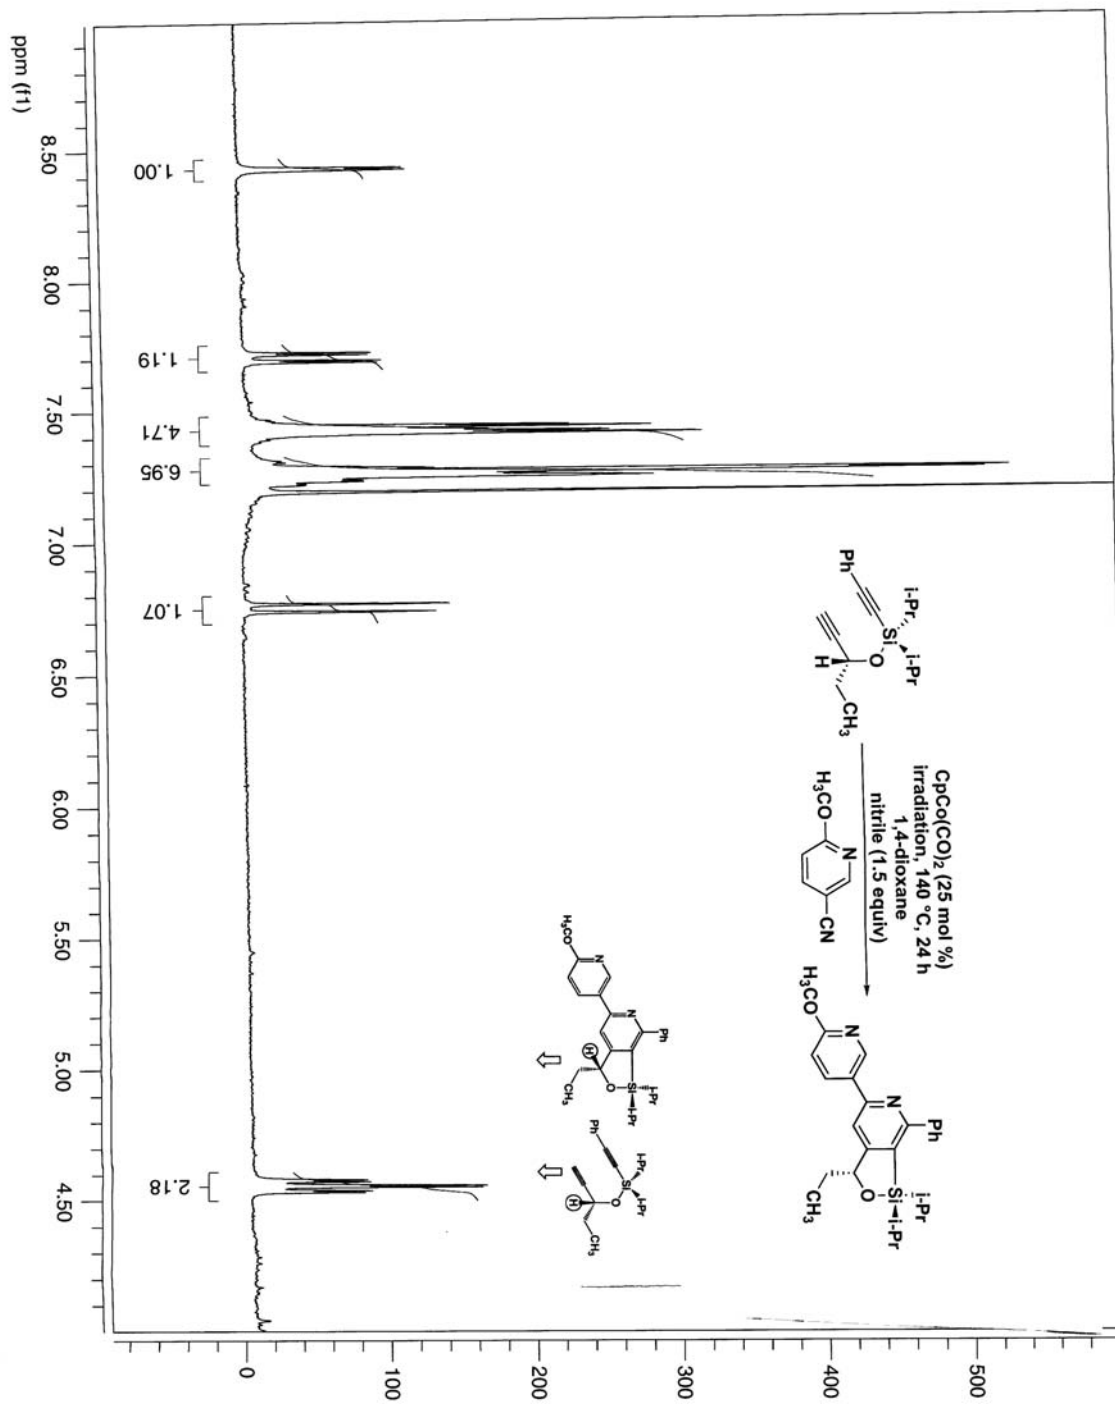

Solvent: CDCl<sub>3</sub> – Frequency: 300 MHz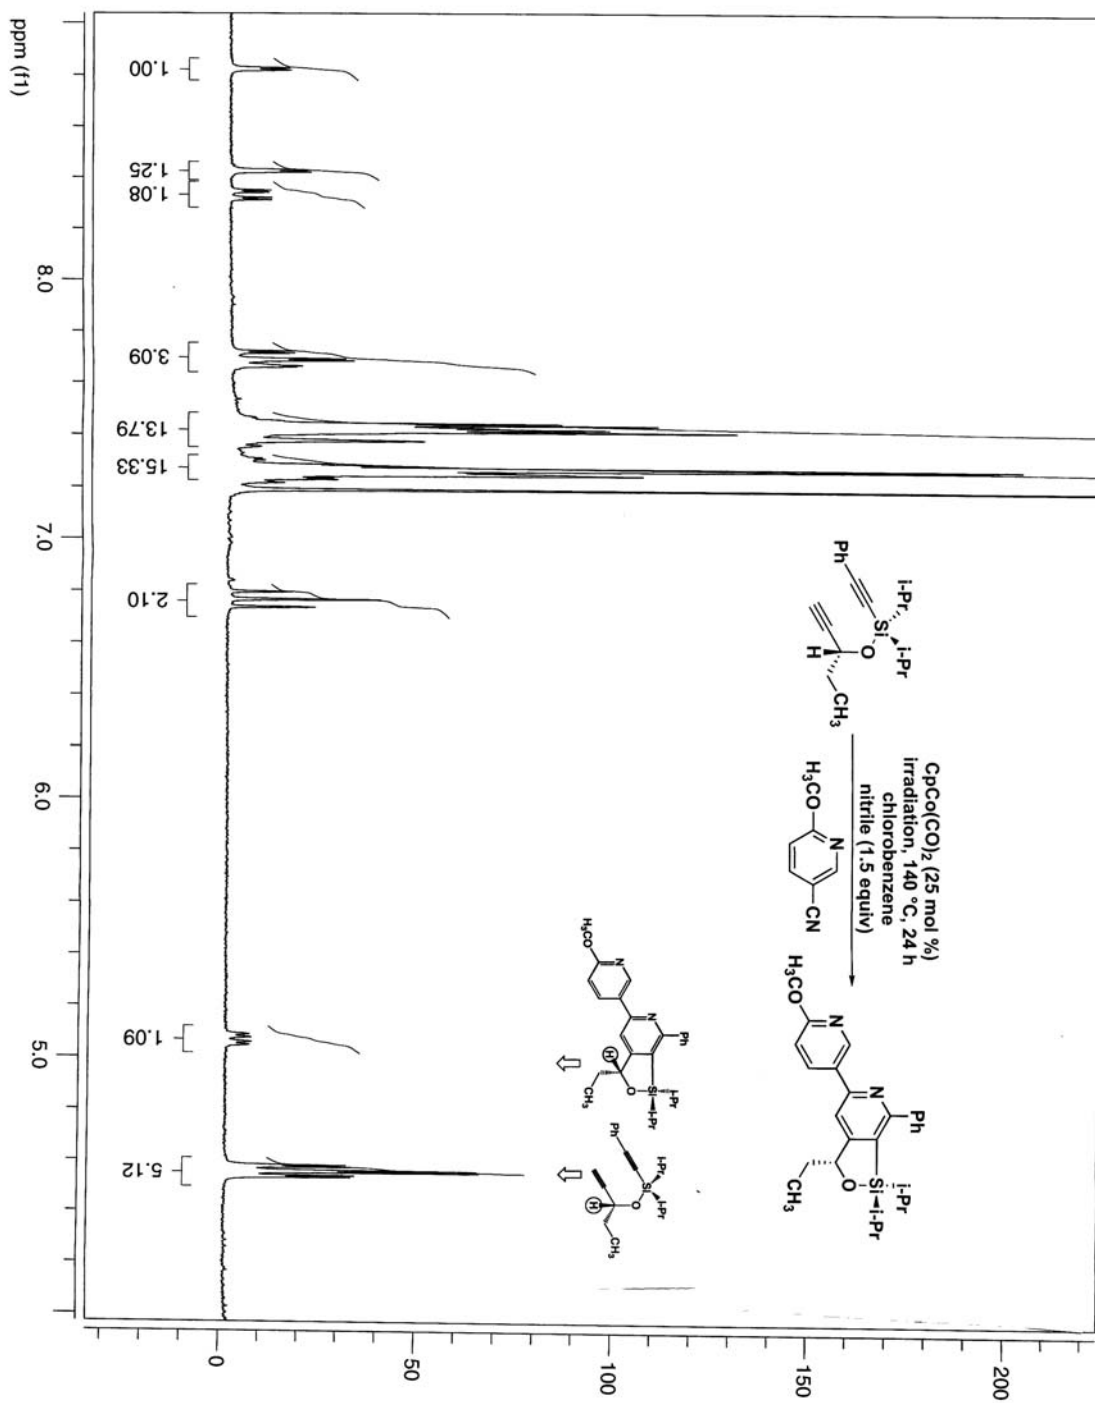

Solvent: CDCl<sub>3</sub> – Frequency: 300 MHz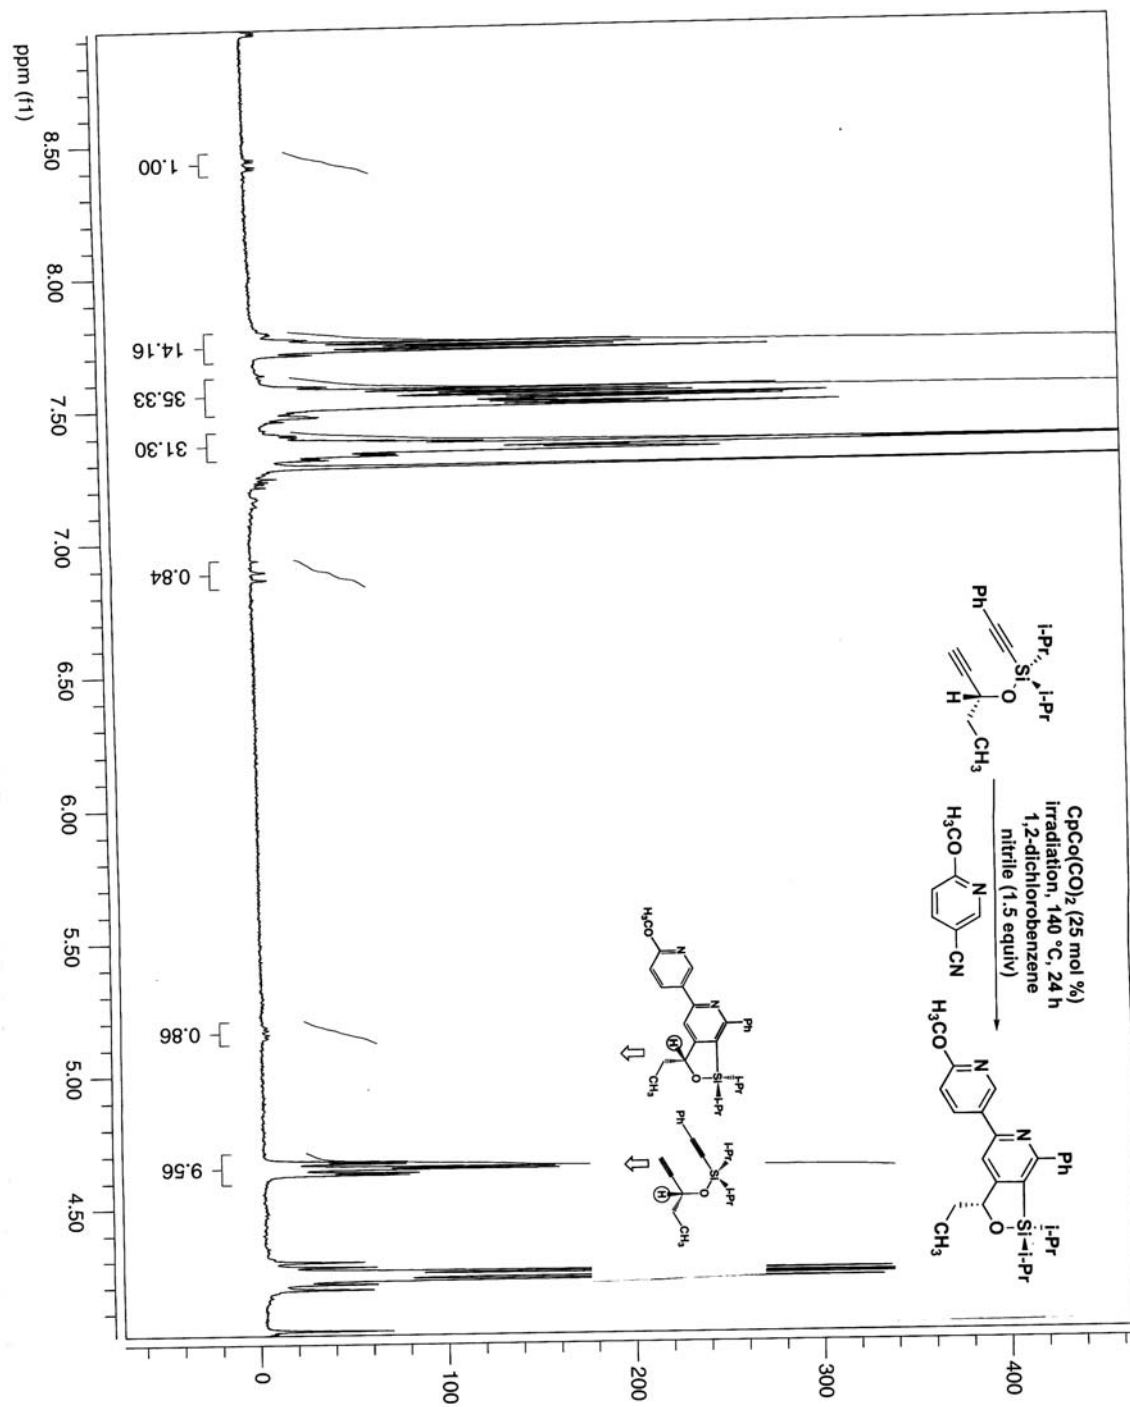

Solvent: CDCl<sub>3</sub> – Frequency: 300 MHz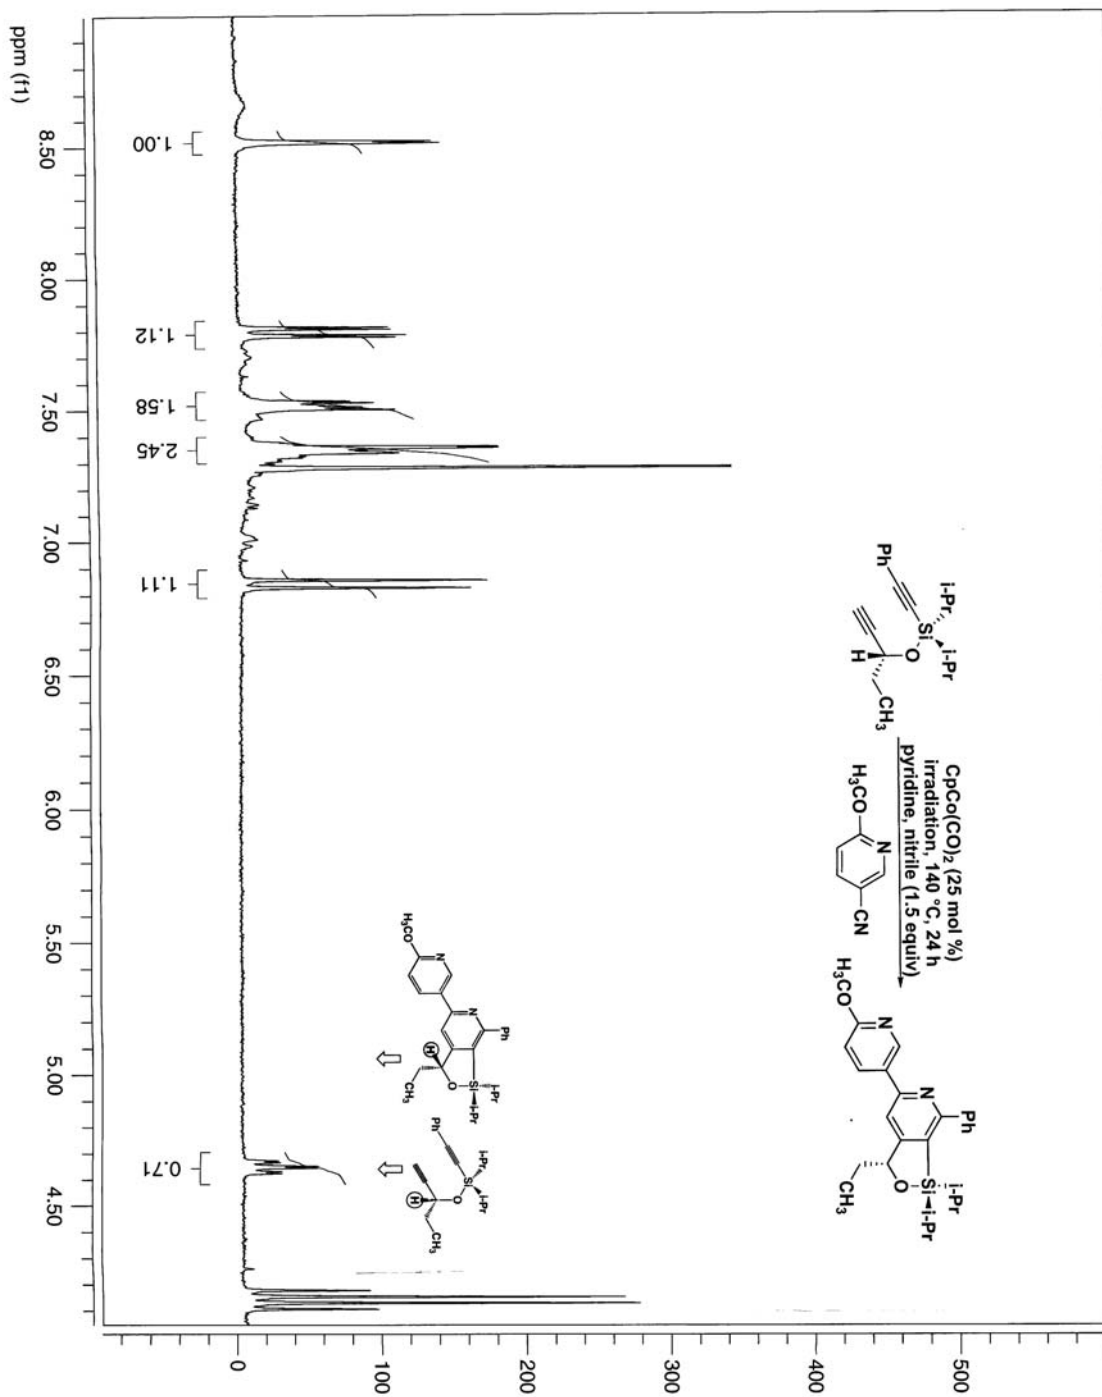

Solvent: CDCl<sub>3</sub> – Frequency: 300 MHz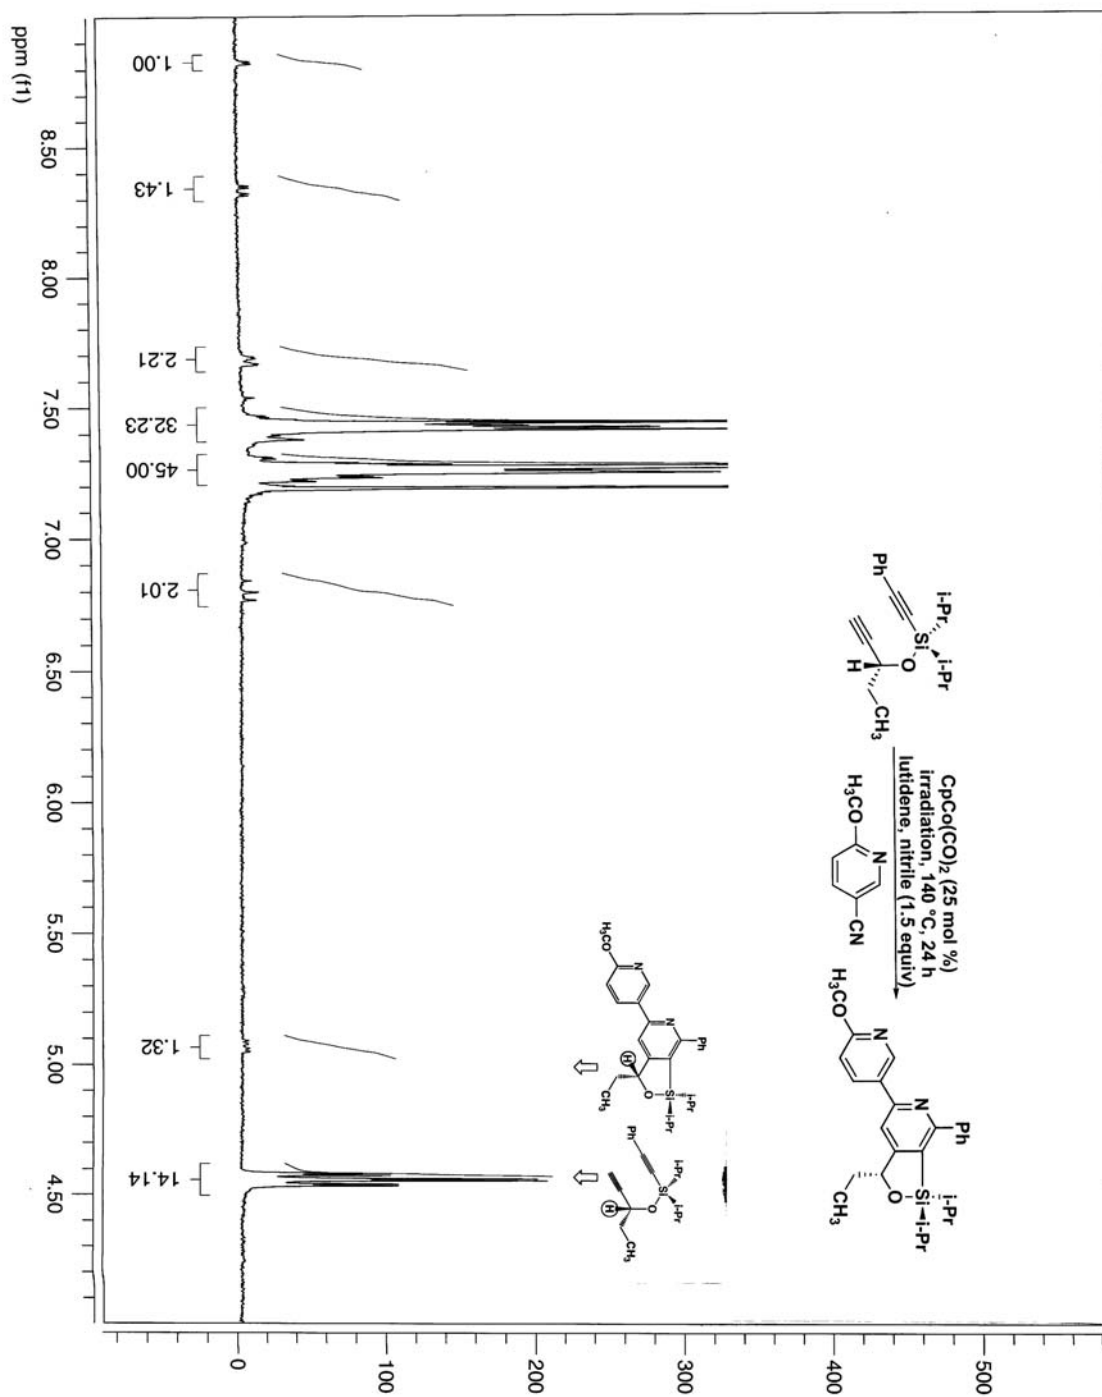

Solvent: CDCl<sub>3</sub> – Frequency: 300 MHz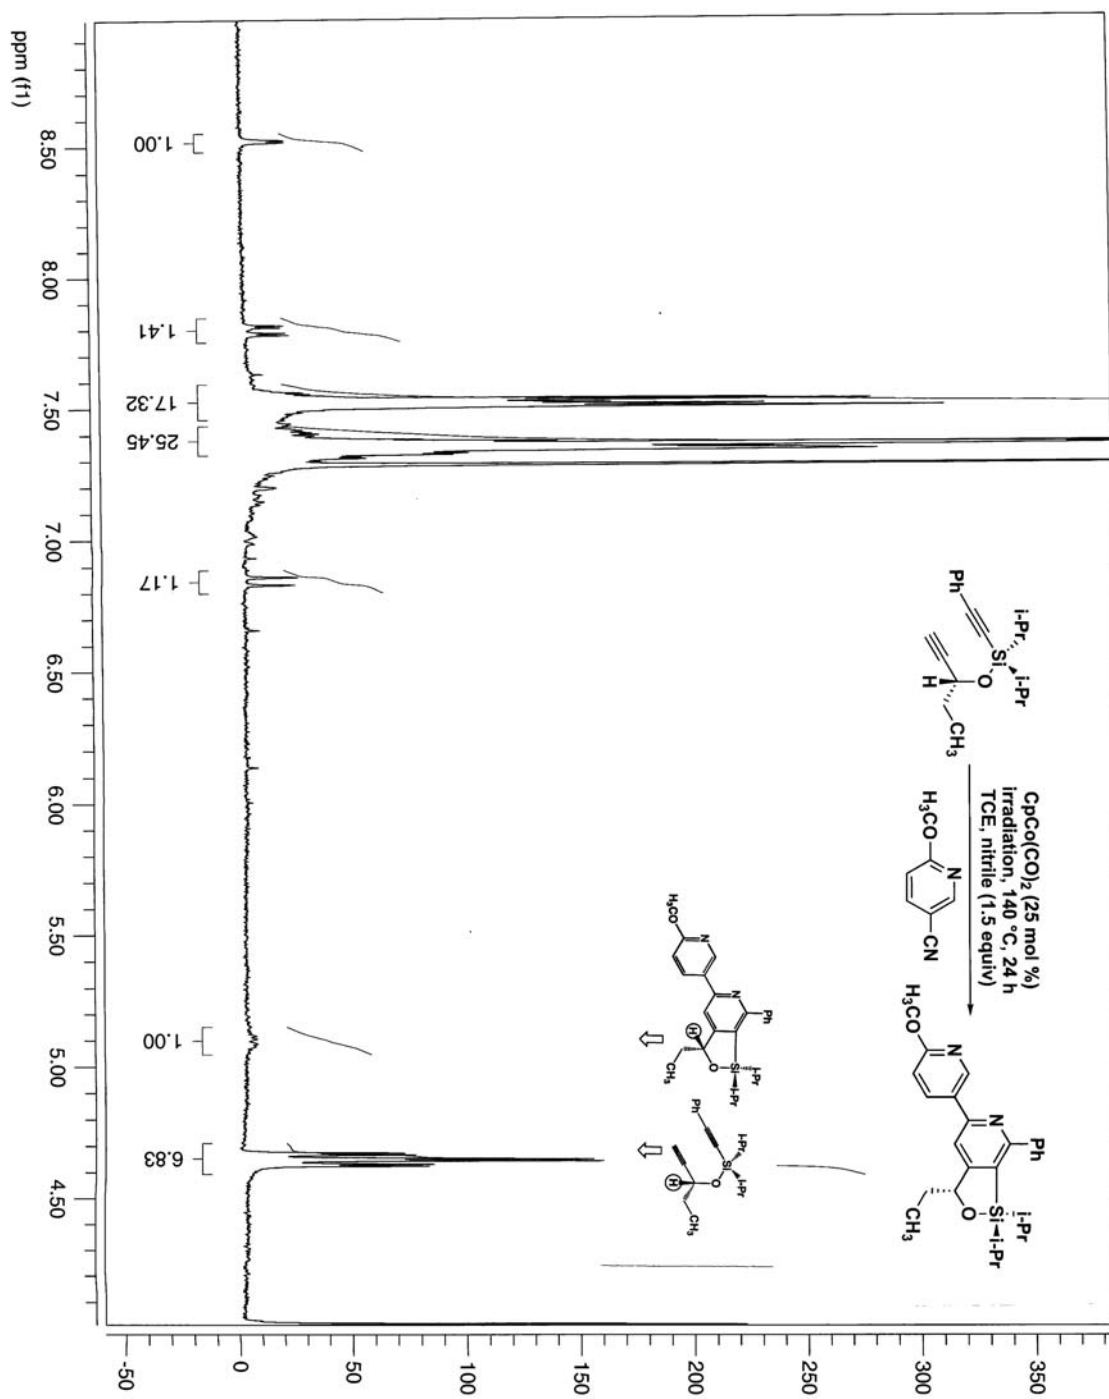

Solvent: CDCl<sub>3</sub> – Frequency: 300 MHz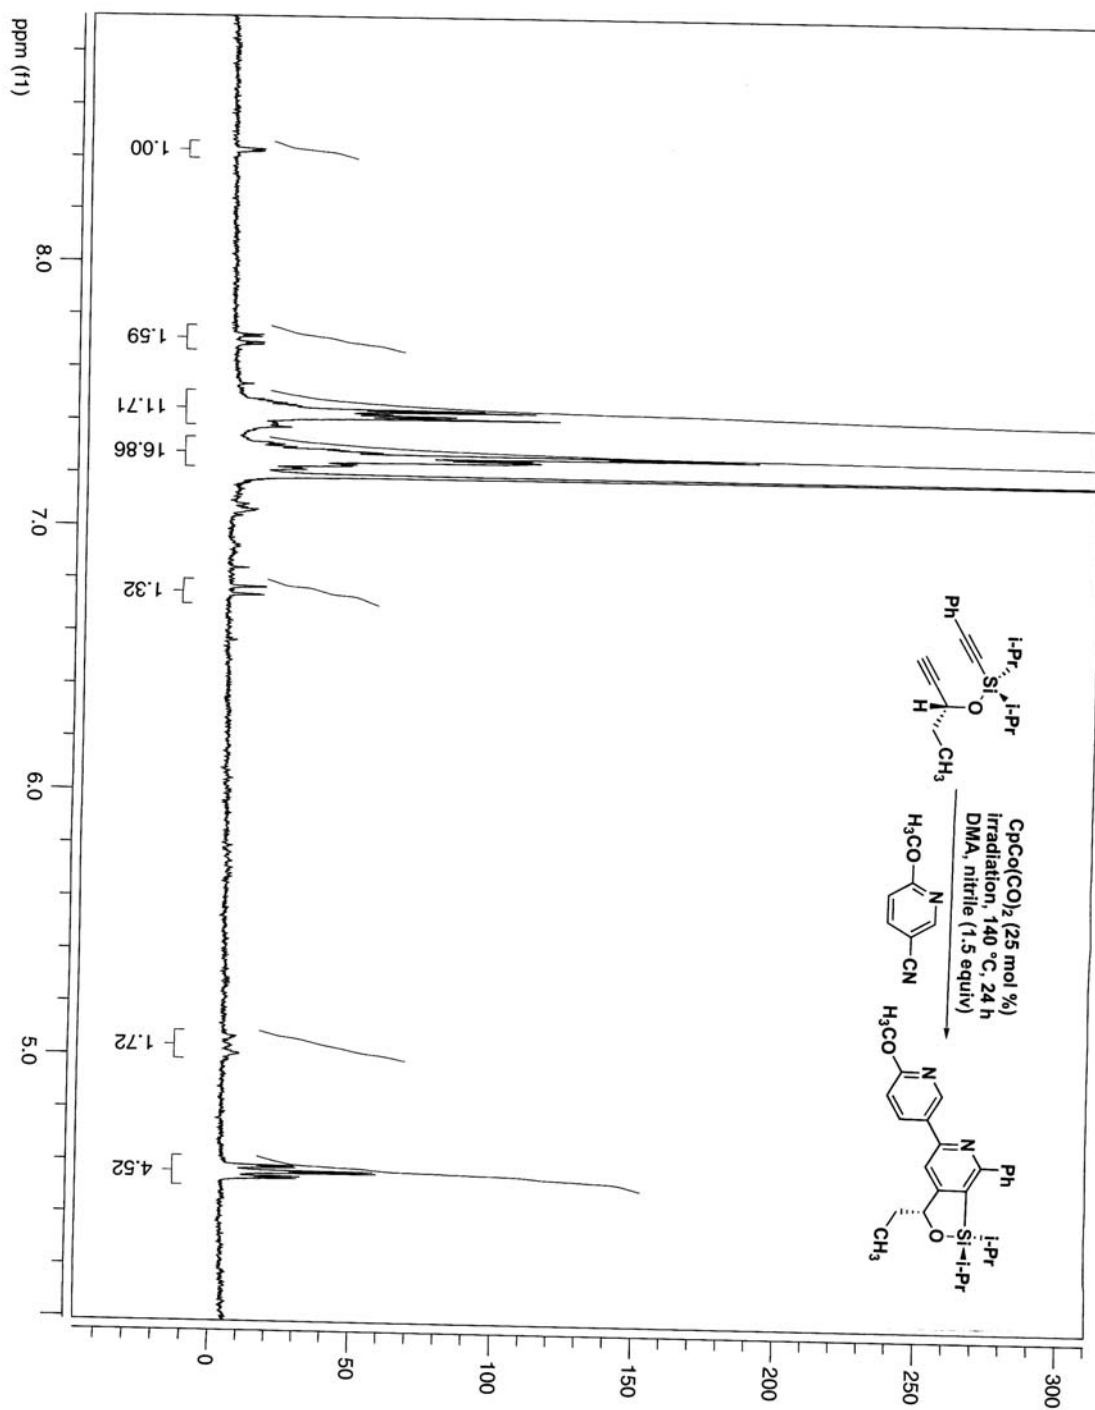

Solvent: CDCl<sub>3</sub> – Frequency: 300 MHz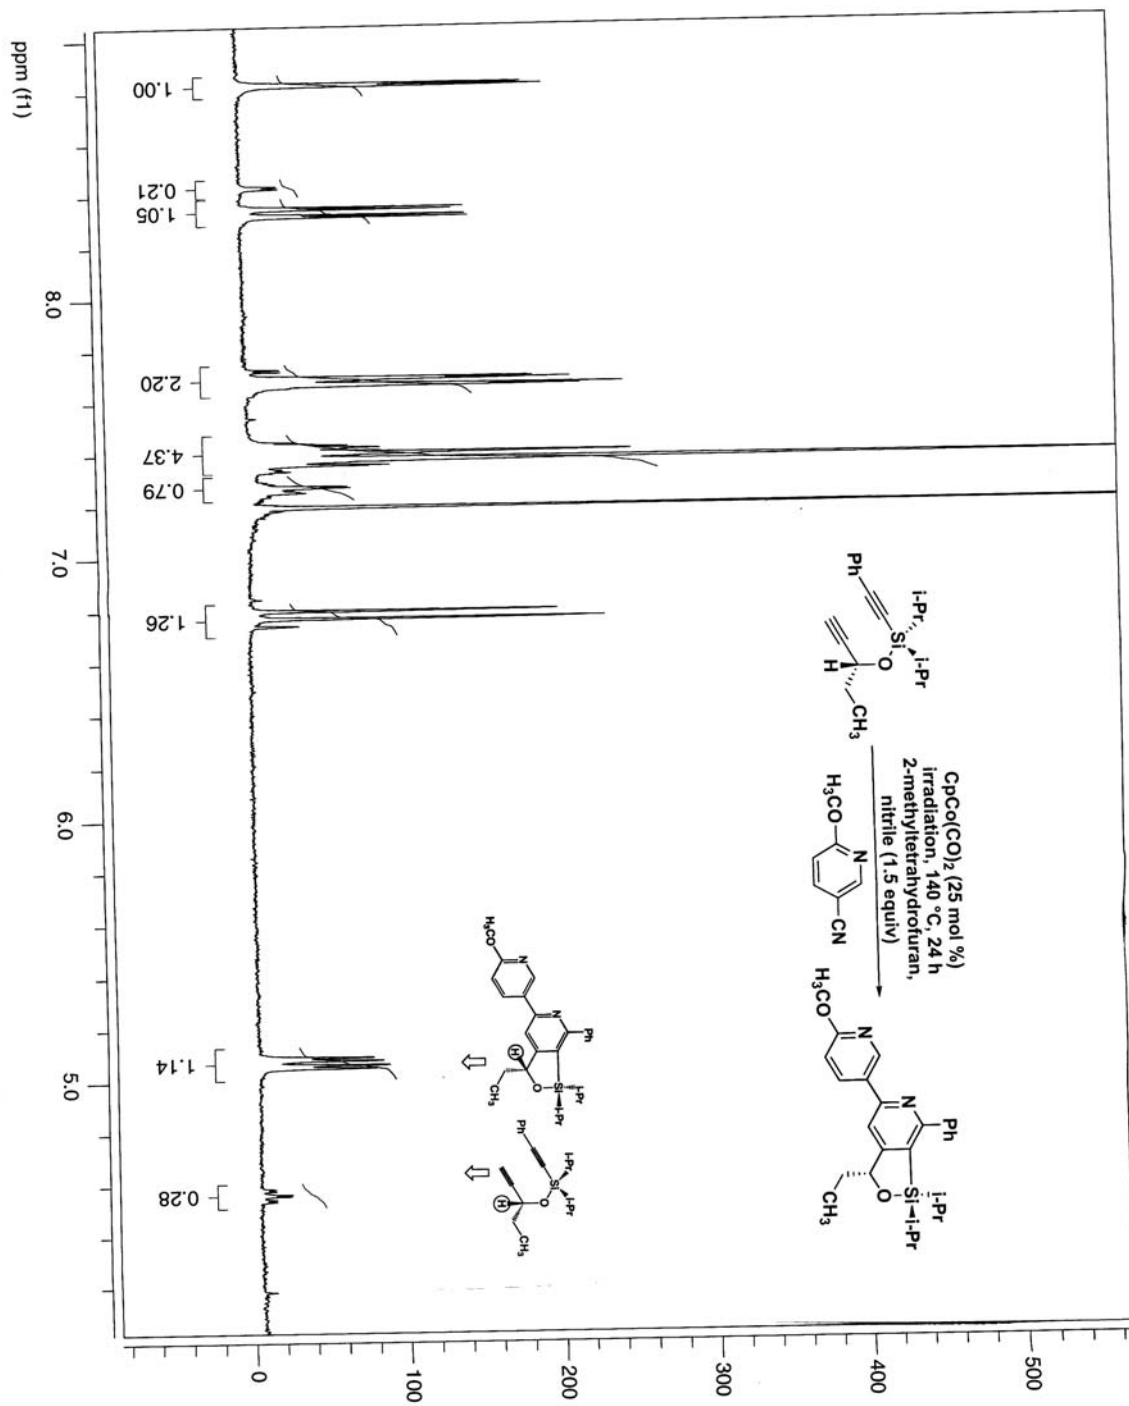



Solvent: CDCl<sub>3</sub> – Frequency: 300 MHz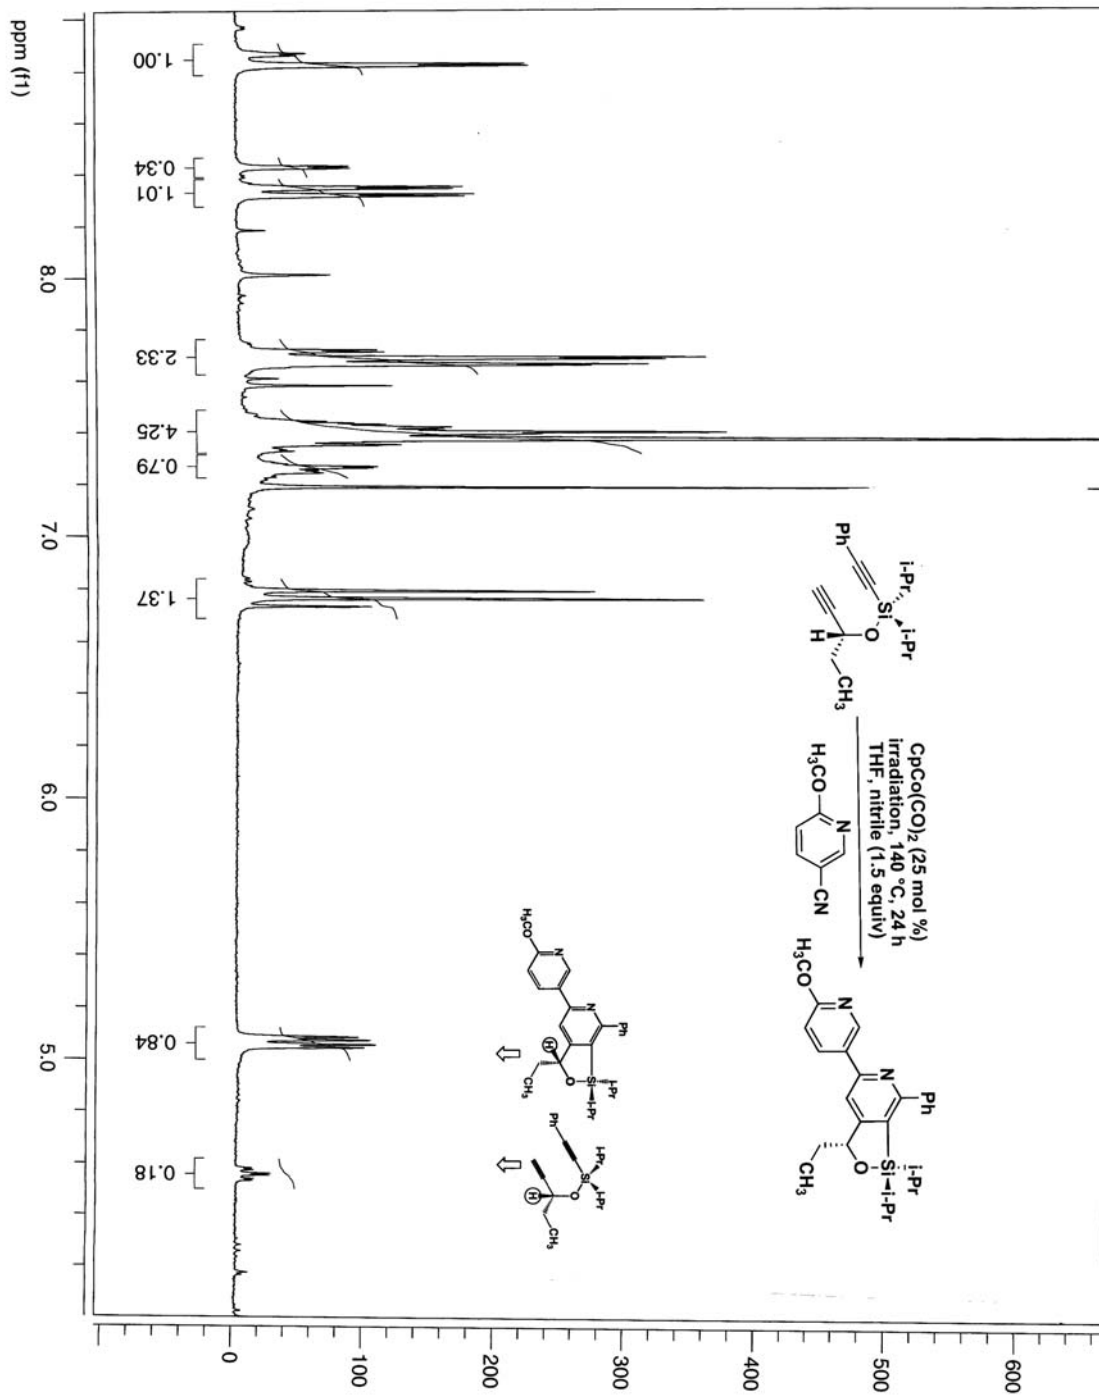

Solvent: CDCl<sub>3</sub> – Frequency: 300 MHz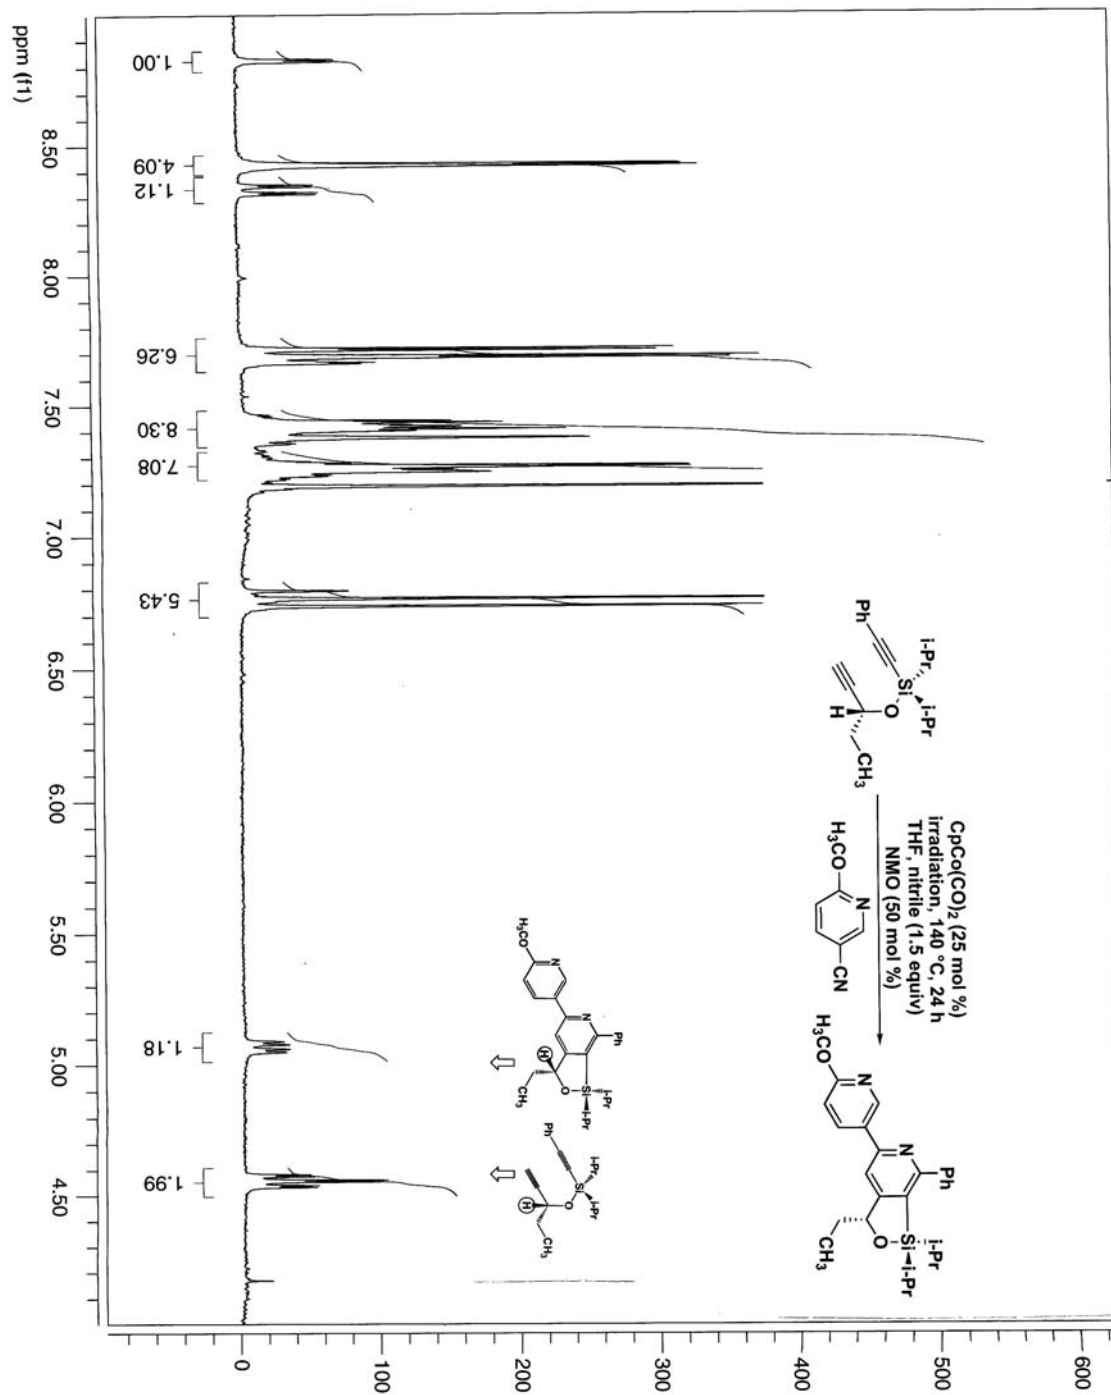

Solvent: CDCl<sub>3</sub> – Frequency: 300 MHz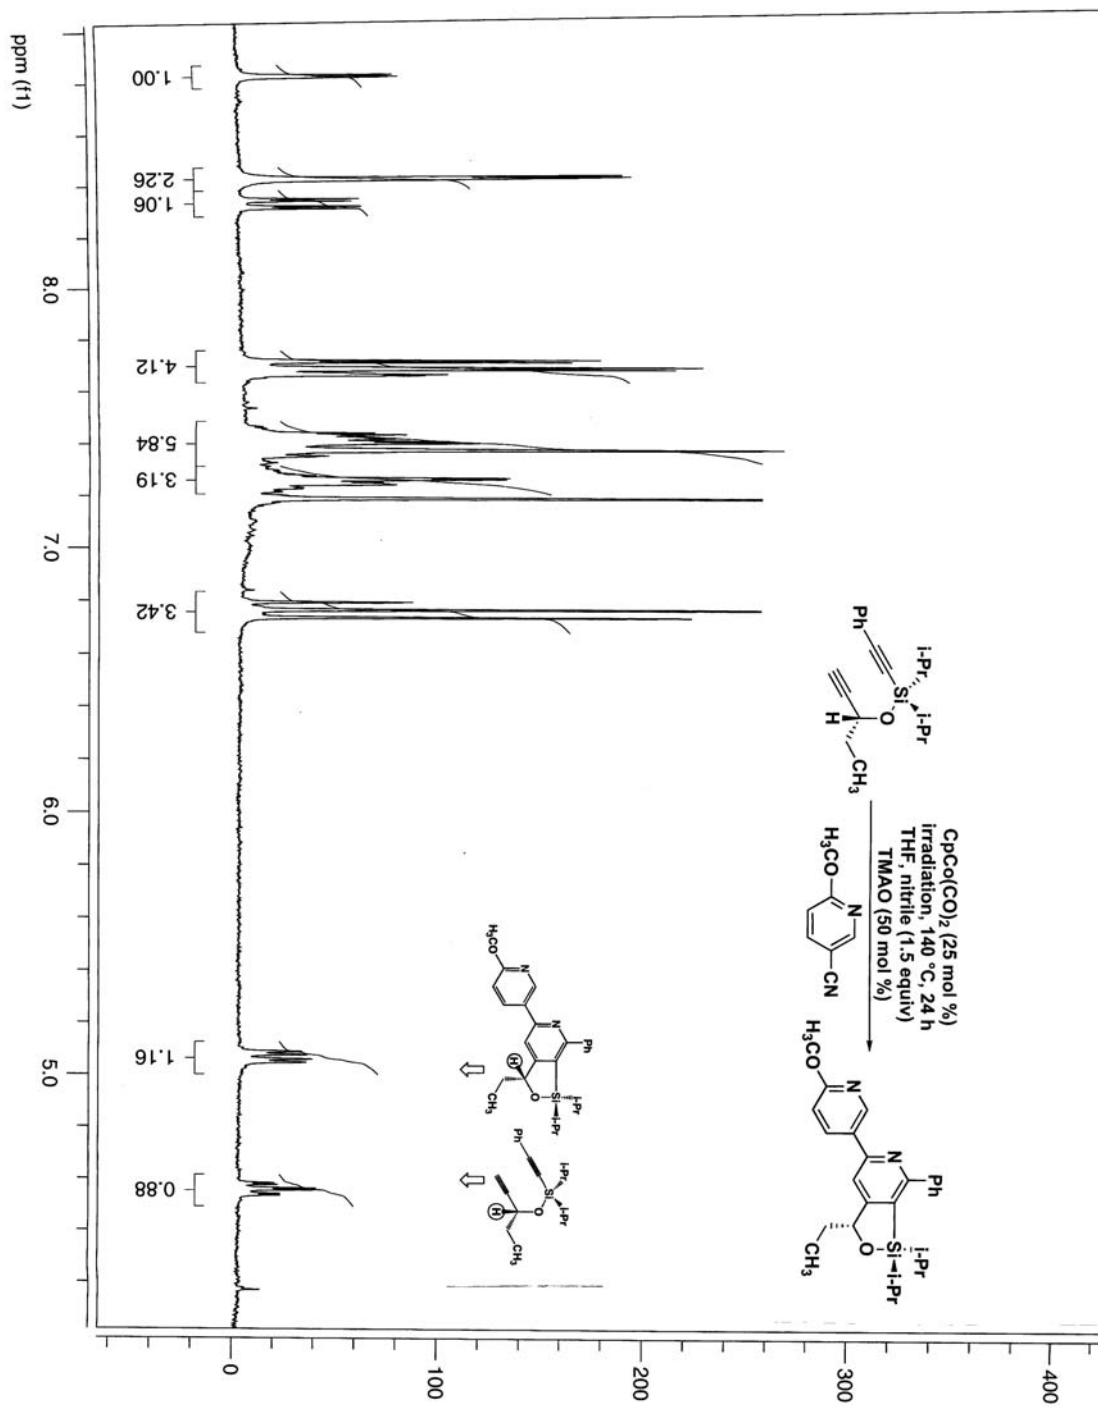

Solvent: CDCl<sub>3</sub> – Frequency: 300 MHz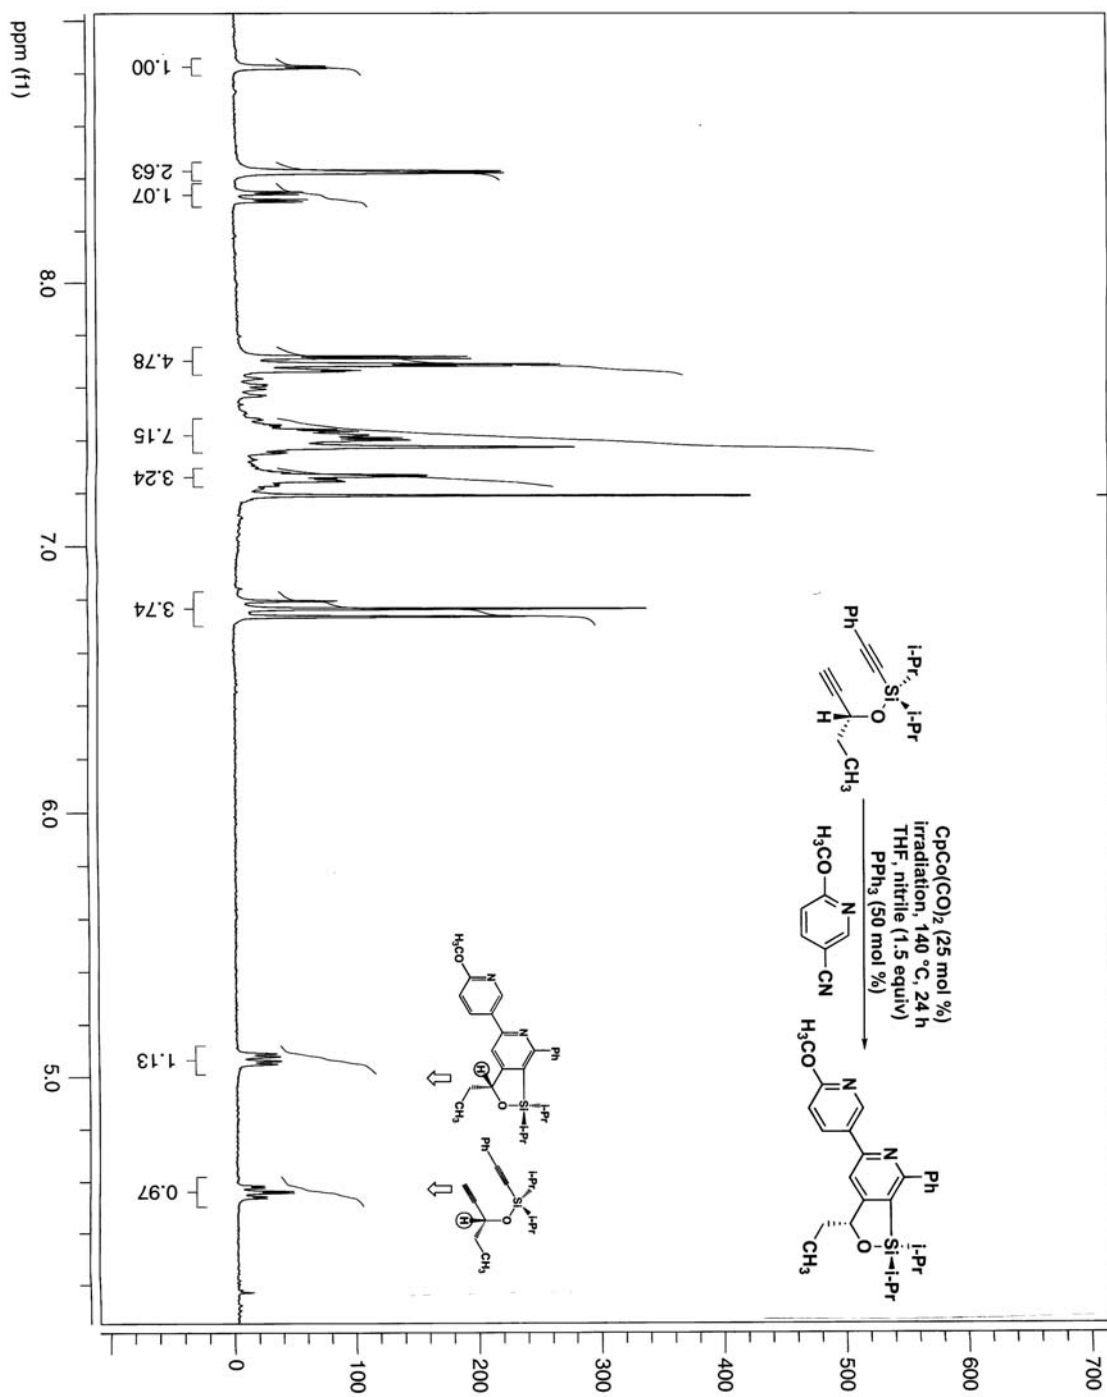

Solvent: CDCl<sub>3</sub> – Frequency: 300 MHz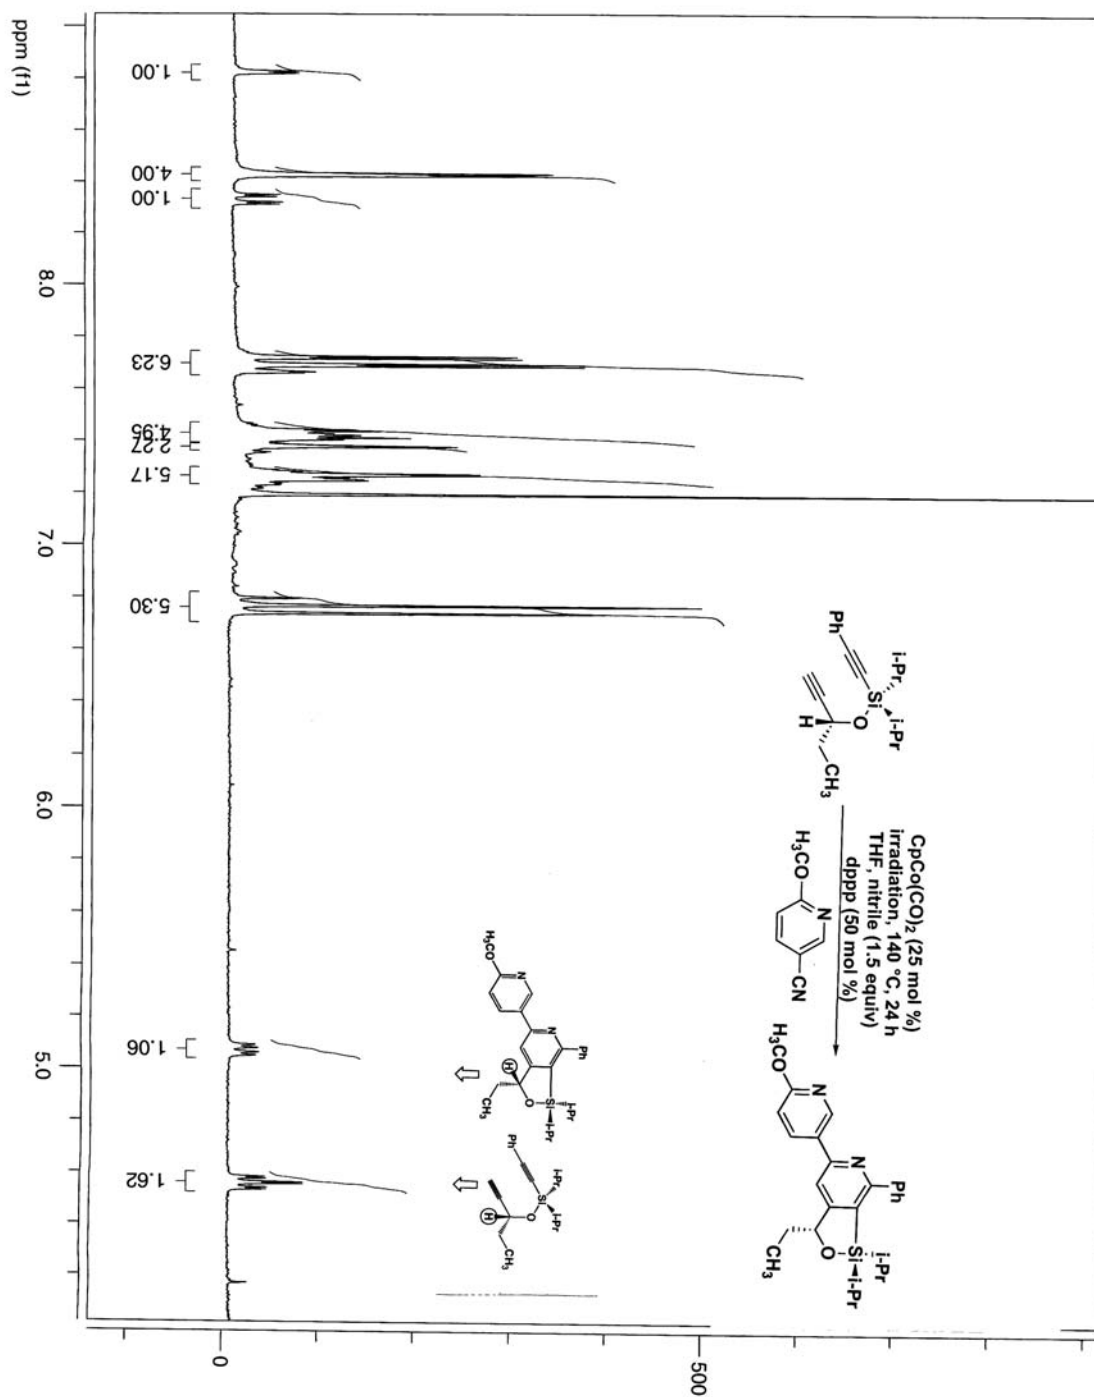

Solvent: CDCl<sub>3</sub> – Frequency: 300 MHz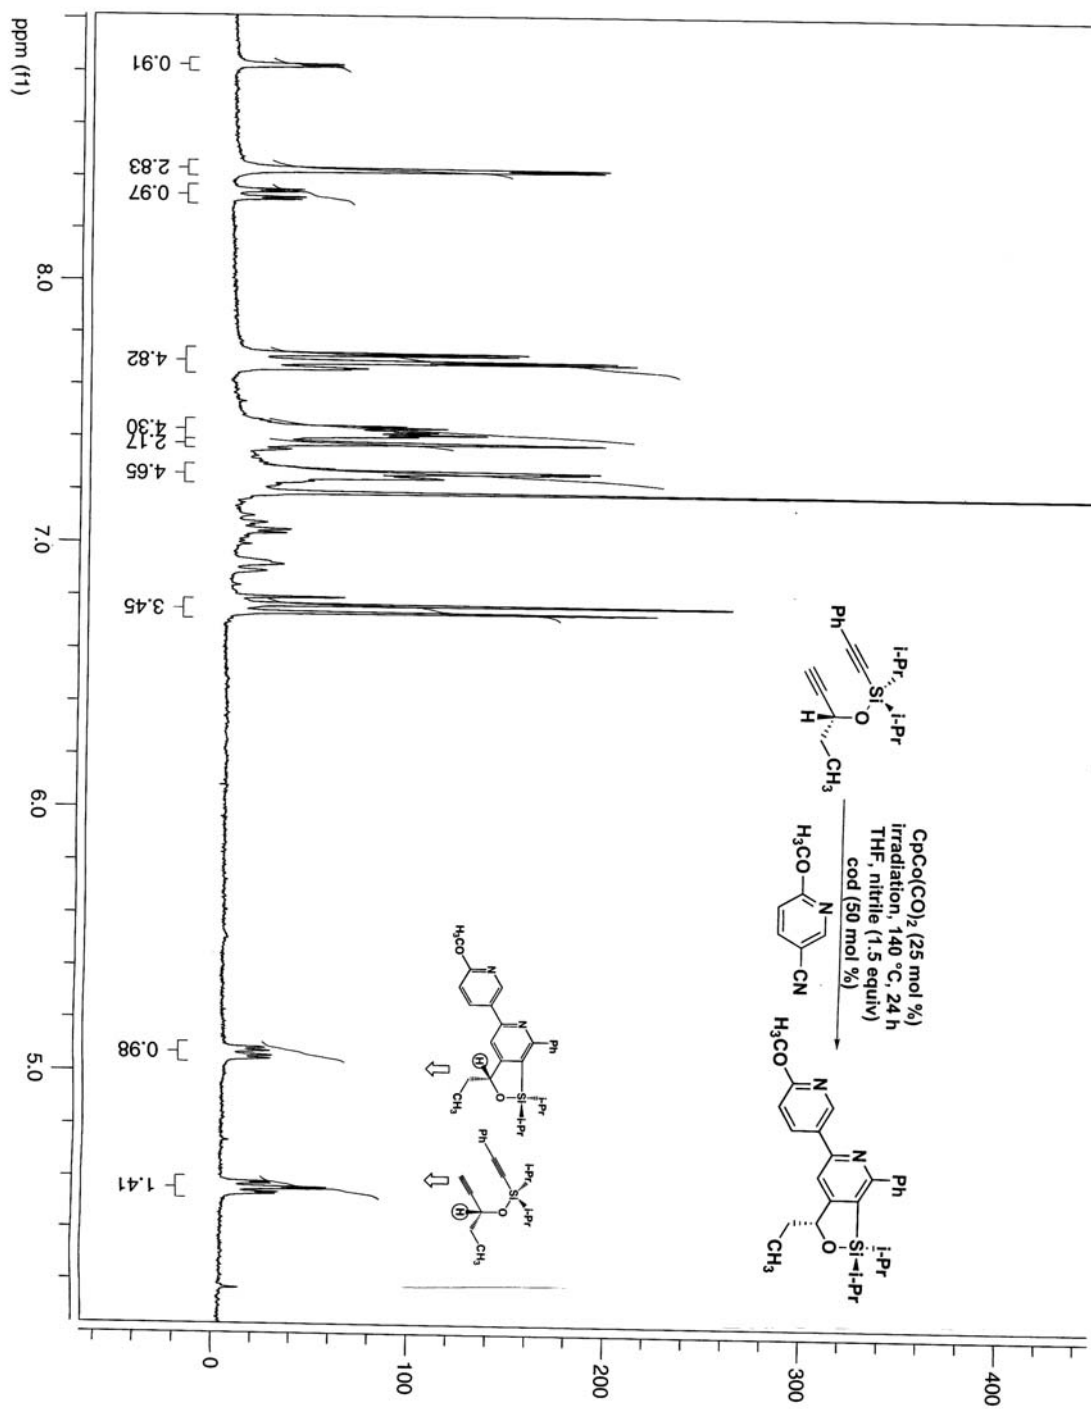



Solvent: CDCl<sub>3</sub> – Frequency: 300 MHz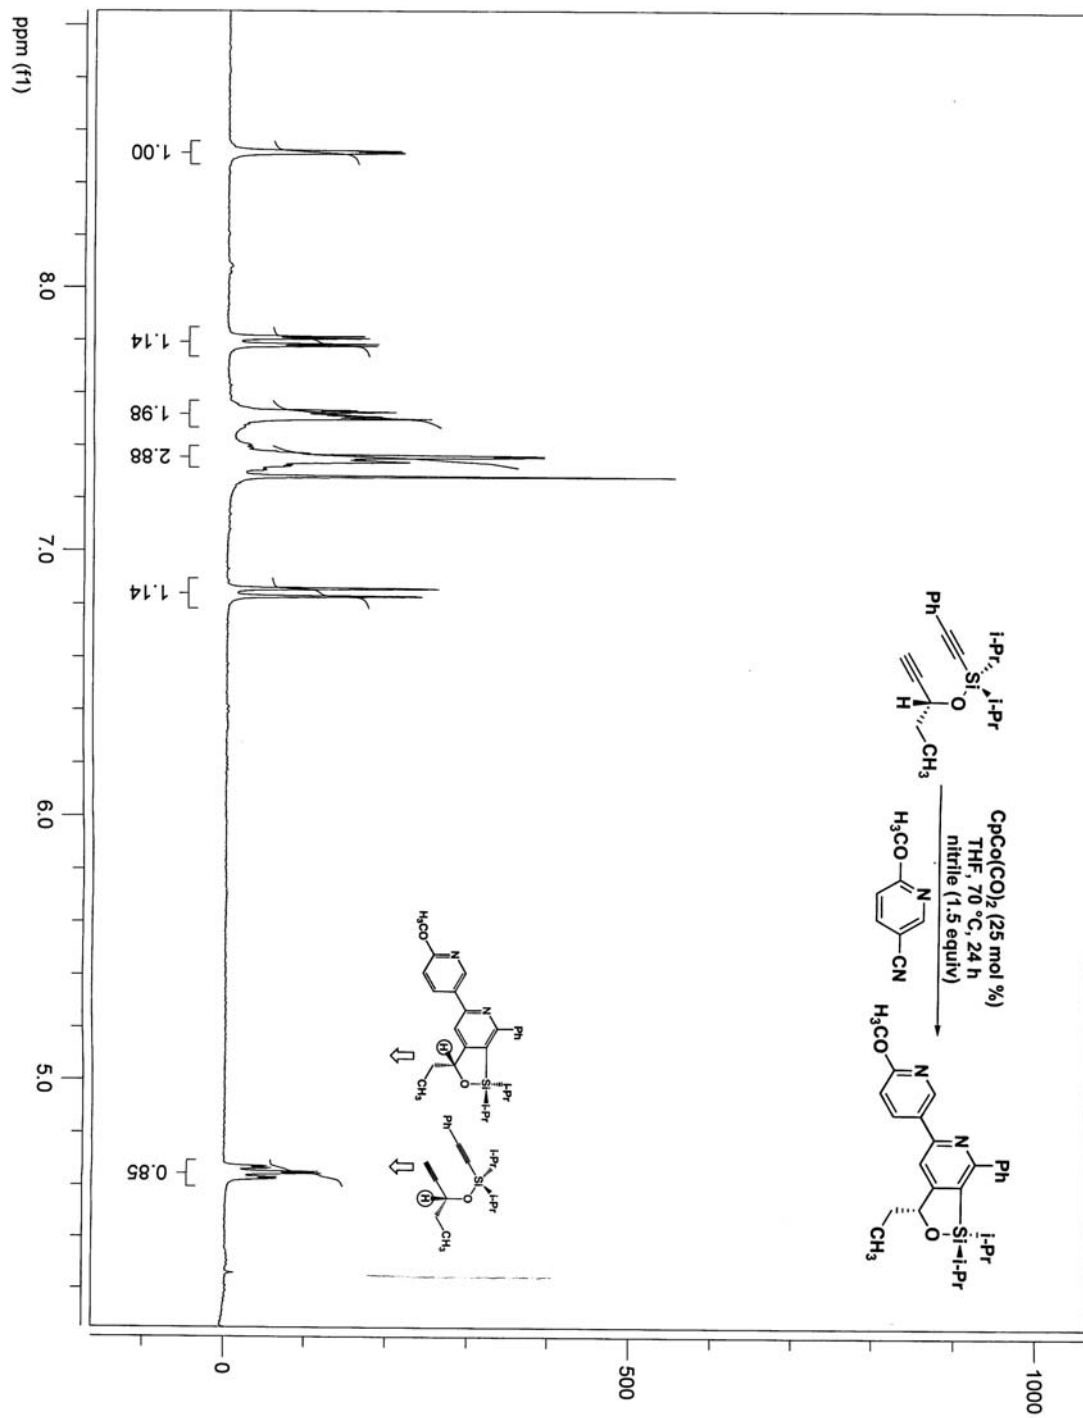



**Representative procedure for nitrile screening (Table II):**

Diisopropyl(pent-1-yn-3-yloxy)(phenylethynyl)silane **1** (10.0 mg, 0.033 mmol) was placed into an oven-dried sealed tube equipped with magnetic stirrer and dissolved in degassed THF (0.67 ml). Nitriles **7-18** (0.05 mmol, 1.5 equiv) were added either as solids or as solutions in degassed THF (0.1 – 0.2 ml) to the stirring solution. After complete dissolution, a solution of cyclopentadienylcobalt(I) dicarbonyl (1.8 mg, 0.010 mmol, 30 mol %) in degassed xylenes (50  $\mu$ l) was introduced by syringe, giving a pale yellow solution. The sealed tube was immediately submerged into an oil bath preheated to 140 °C. After 24 h, the dark brown solution was cooled to ambient temperature and loaded onto a 4 g silica plug. Filtration was performed using an *Isco Combiflash* system using a gradient solvent commencing with hexanes and ending with 1/1 hexanes/ethyl acetate (total volume of approximately 40 ml), which effectively removed insoluble cobalt byproducts. Pooled fractions were concentrated *in vacuo* and assayed for conversion by <sup>1</sup>H NMR. Purification was performed by silica gel chromatography using an *Isco Combiflash* 12 g column with 20:1 hexanes:EtOAc as eluant, providing the corresponding pyridines **19-26**.

**Representative spectral data for nitrile screening experiments (Table II):**

<sup>1</sup>H NMR spectra for selected entries:

| <i>page</i> | <i>table 2 entry</i> | <i>nitrile</i> | $\delta_{subst}$ (ppm) | $\delta_{product}$ (ppm) | <i>conversion</i> |
|-------------|----------------------|----------------|------------------------|--------------------------|-------------------|
| S-34        | 3                    | <b>8</b>       | 4.6 ppm                | 5.0 ppm                  | 56%               |
| S-35        | 4                    | <b>8</b>       | 4.6 ppm                | 5.0 ppm                  | >95%              |
| S-36        | 5                    | <b>9</b>       | 4.6 ppm                | 5.1 ppm                  | 74%               |
| S-37        | 6                    | <b>9</b>       | 4.6 ppm                | 5.1 ppm                  | >95%              |
| S-38        | 10                   | <b>13</b>      | 4.6 ppm                | 5.2 ppm                  | 46%               |
| S-39        | 11                   | <b>13</b>      | 4.6 ppm                | 5.2 ppm                  | >95%              |
| S-40        | 12                   | <b>14</b>      | 4.6 ppm                | 5.0 ppm                  | 67%               |

Conversions were determined on the basis of integration between the methine proton H(A) at 4.6 ppm in diisopropyl(pent-1-yn-3-yloxy)(phenylethynyl)silane **1** and the equivalent methine proton H(A) in pyridine adducts **19-26**. See above table for specific chemical shifts for each reaction.

Solvent: CDCl<sub>3</sub> – Frequency: 300 MHz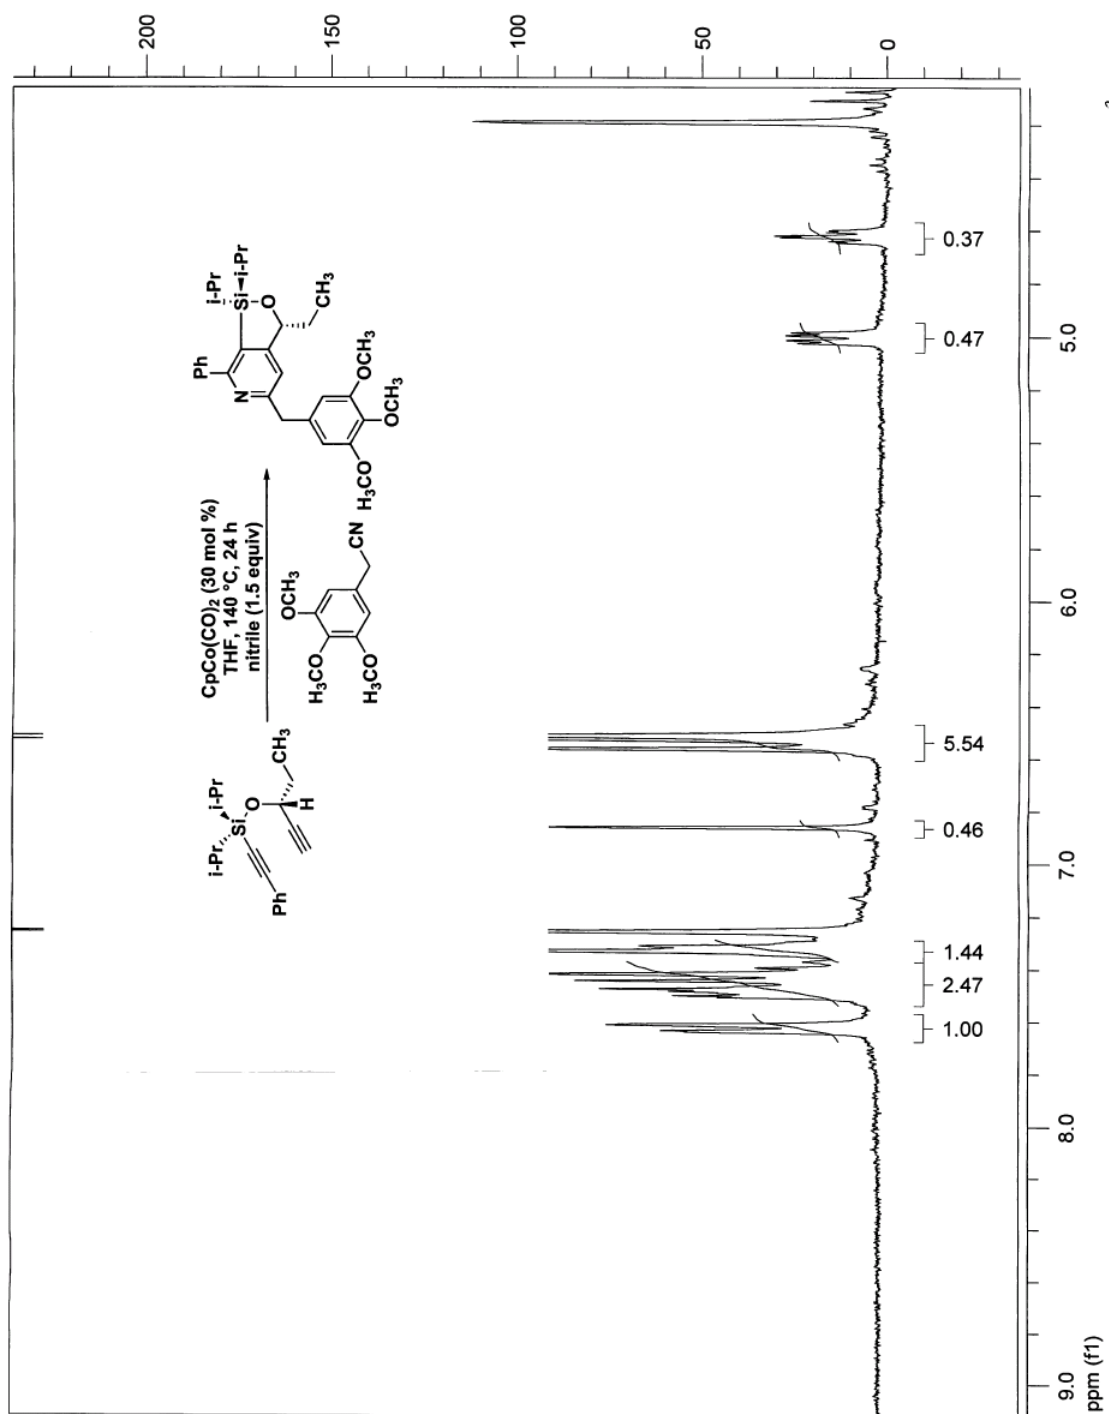

Solvent: CDCl<sub>3</sub> – Frequency: 300 MHz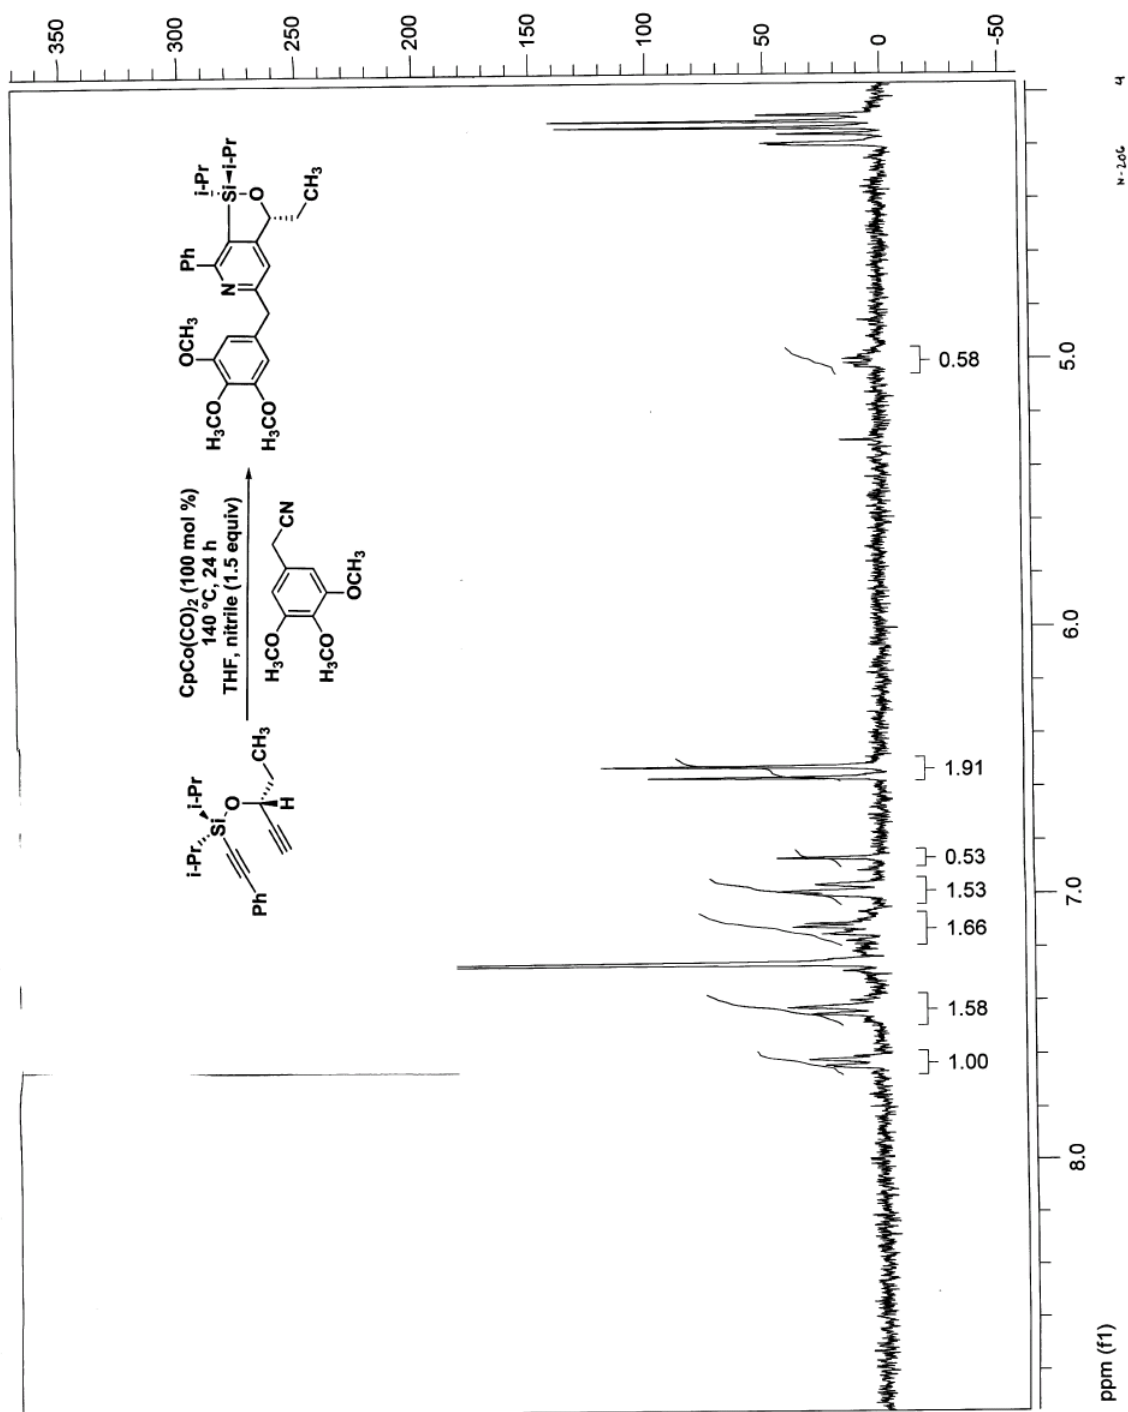

Solvent: CDCl<sub>3</sub> – Frequency: 300 MHz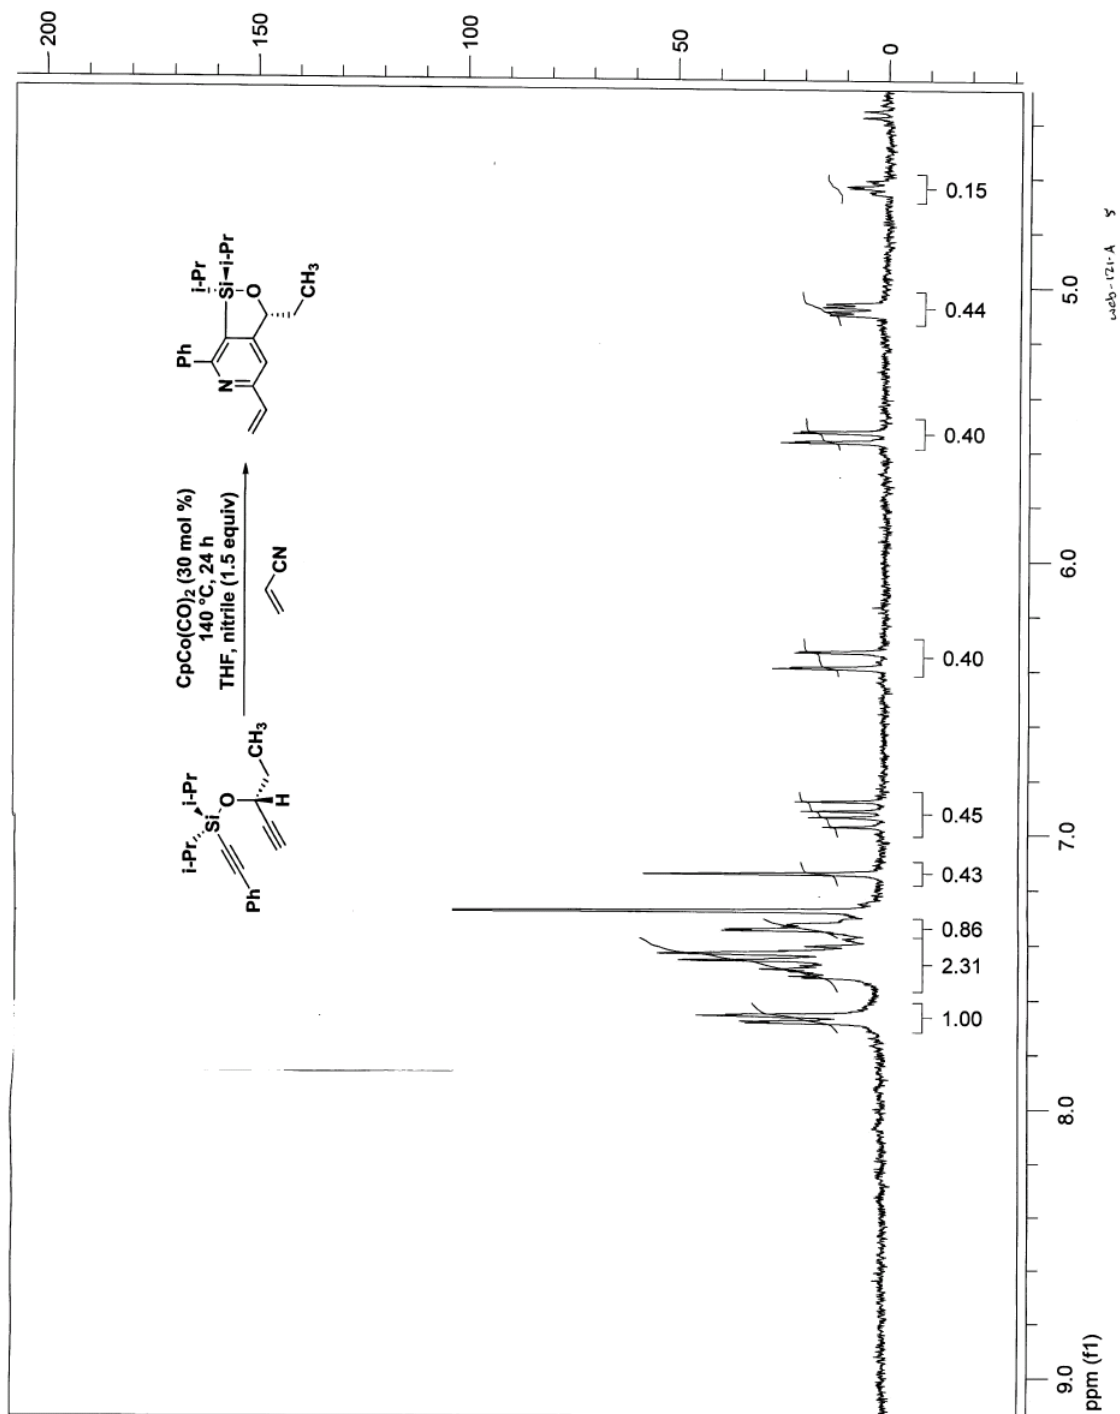

Solvent: CDCl<sub>3</sub> – Frequency: 300 MHz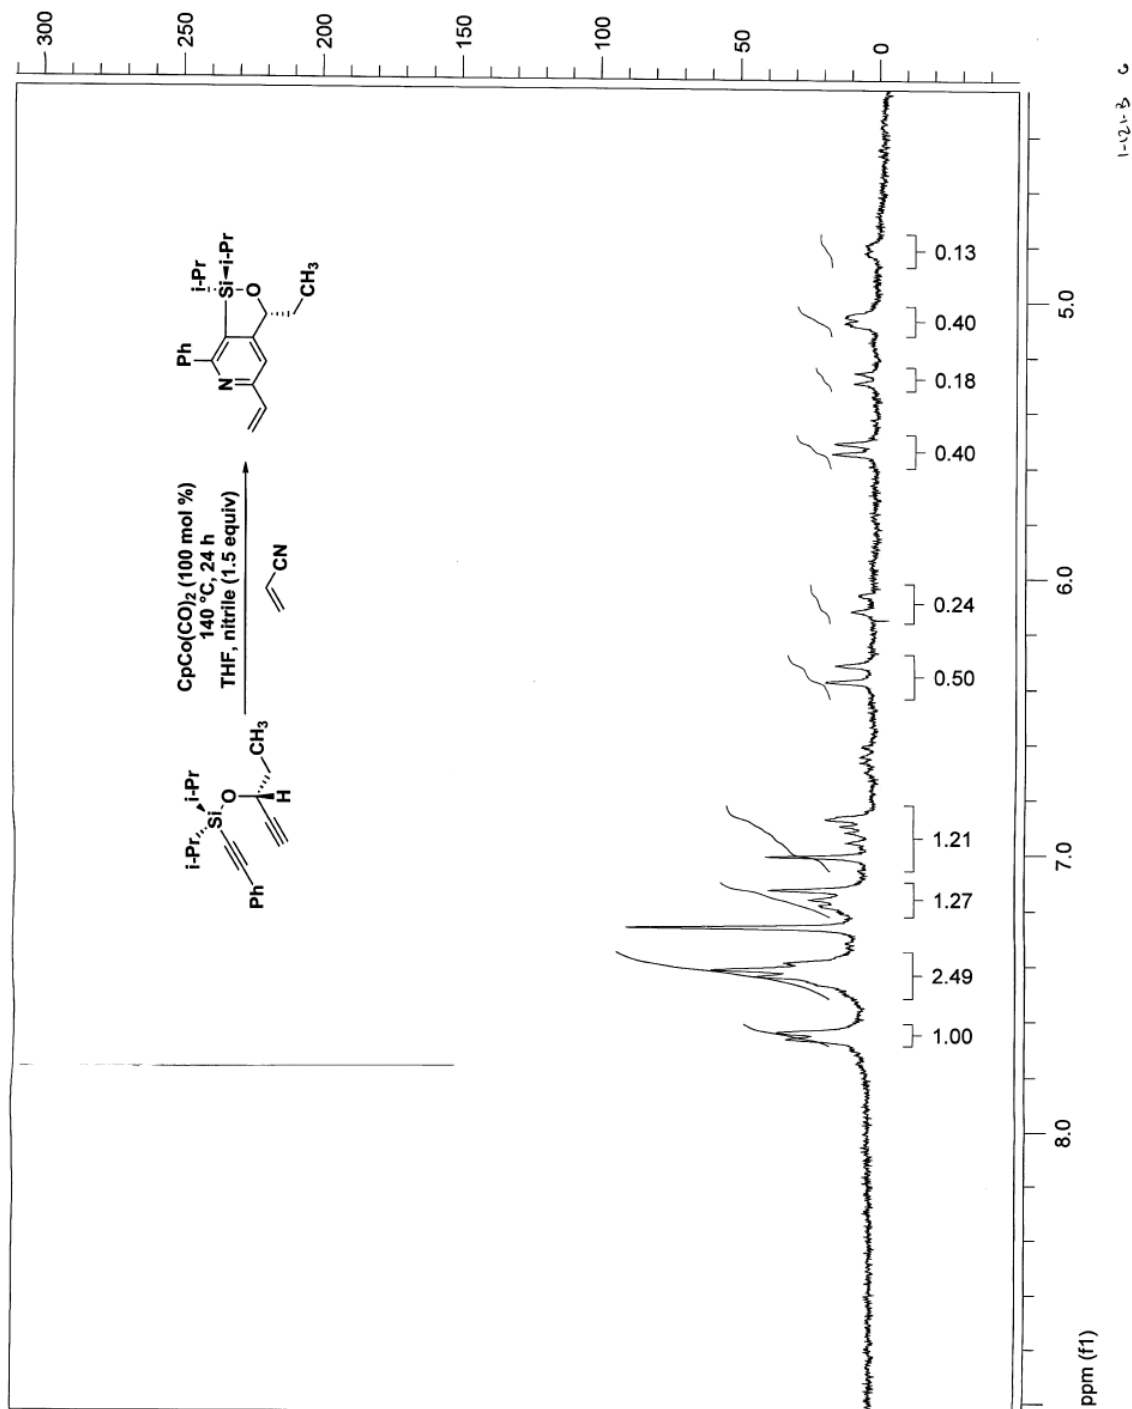

Solvent: CDCl<sub>3</sub> – Frequency: 300 MHz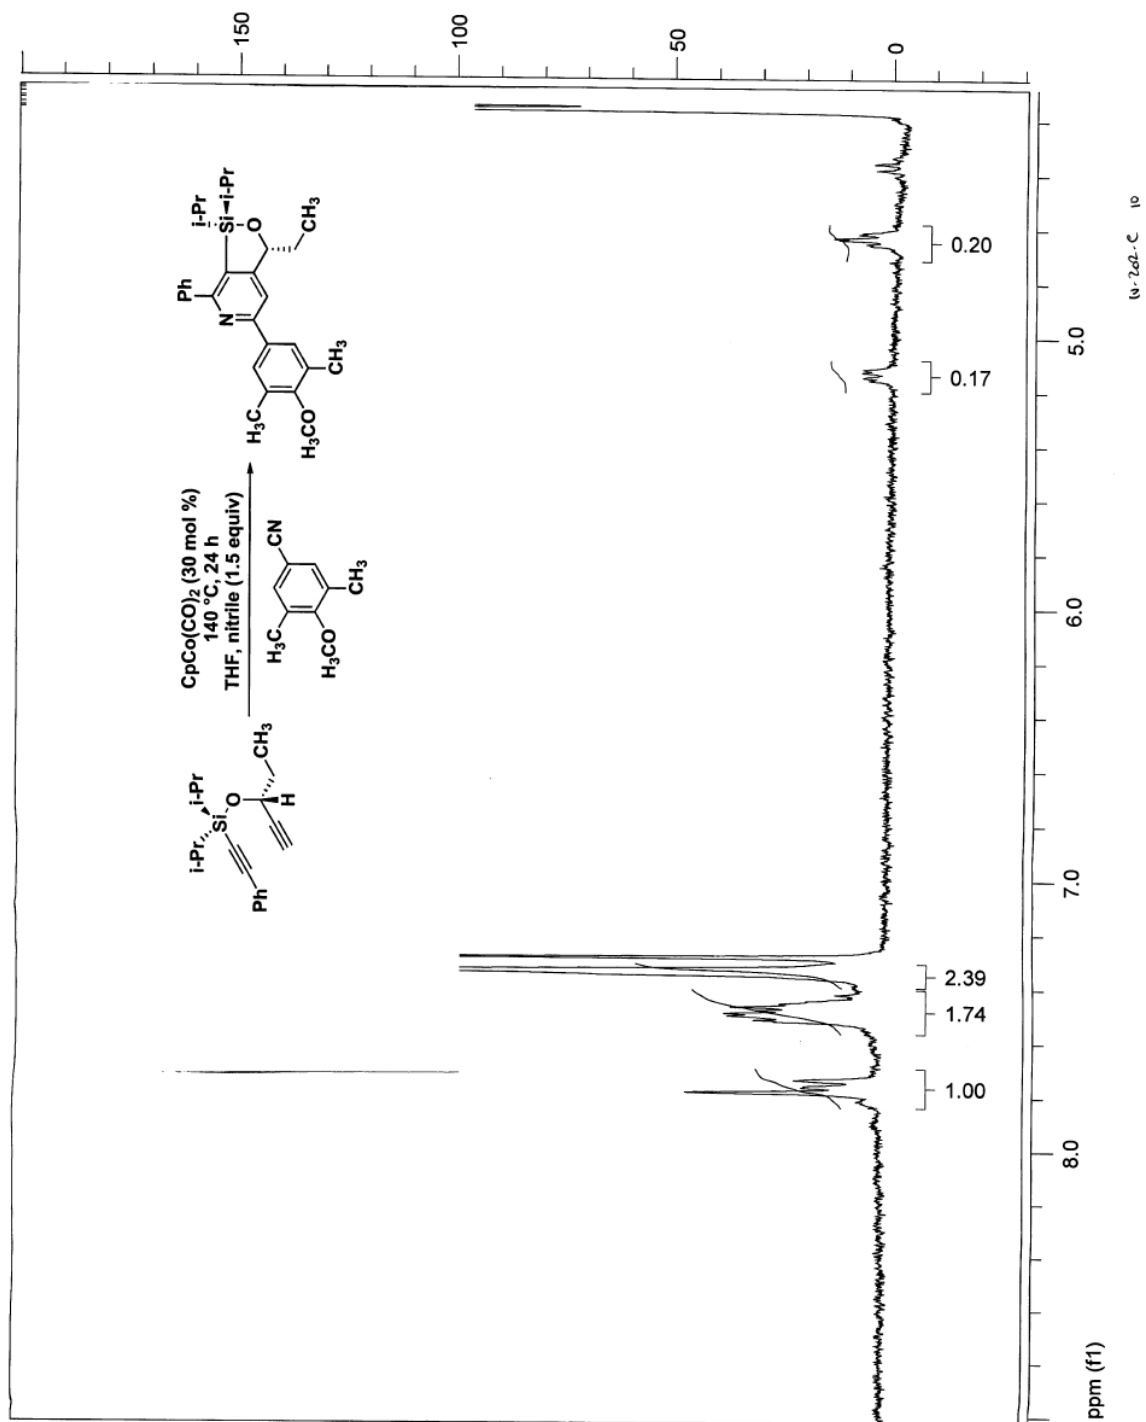

Solvent: CDCl<sub>3</sub> – Frequency: 300 MHz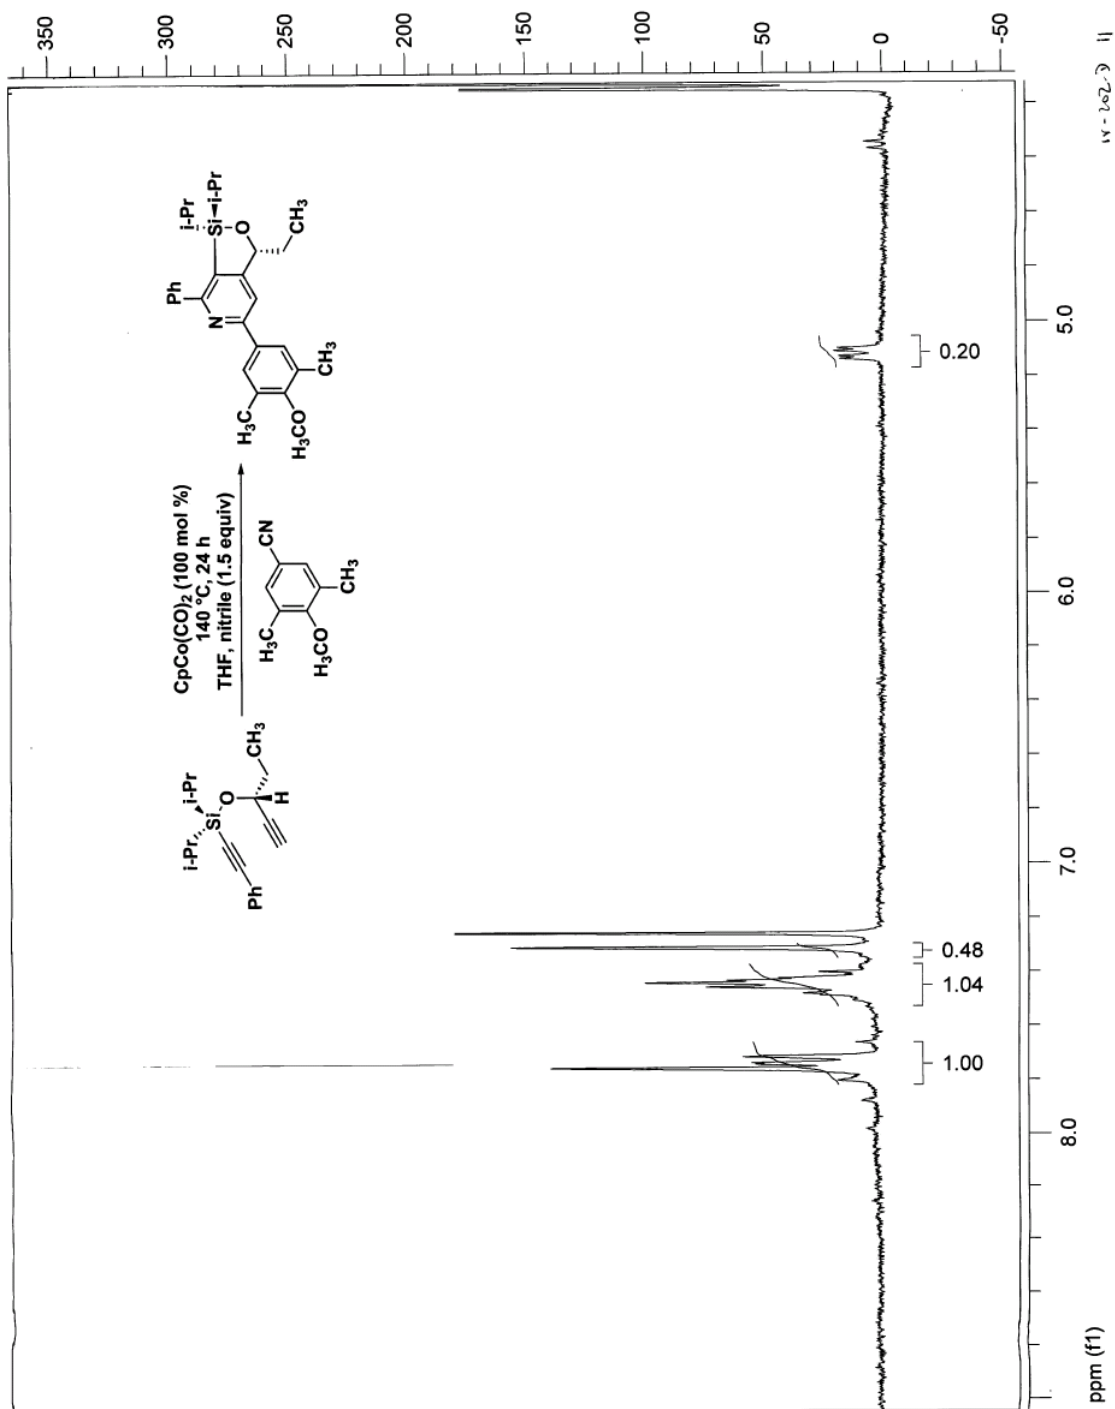

Solvent: CDCl<sub>3</sub> – Frequency: 300 MHz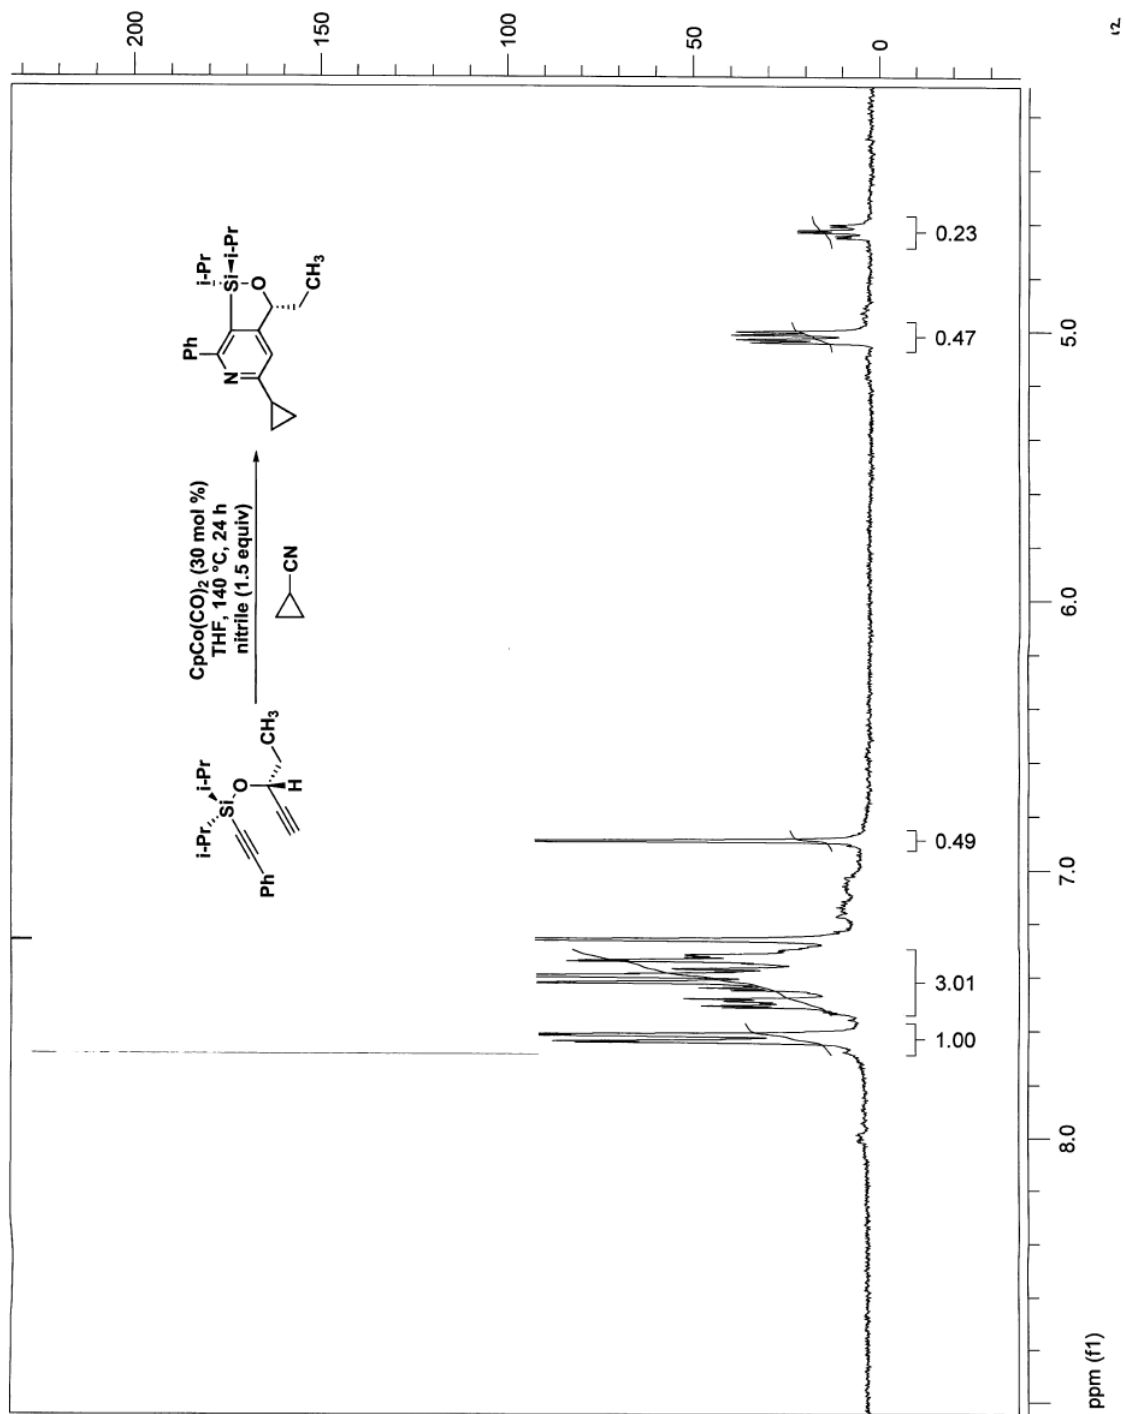



## Characterization data for pyridines (Table II):

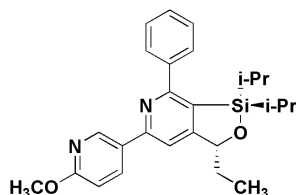

**3-ethyl-1,1-diisopropyl-5-(6-methoxypyridin-3-yl)-7-phenyl-1,3-dihydro-[1,2]oxasilolo[3,4-c]pyridine (5).**  $^1\text{H}$  NMR (500 MHz,  $\text{CDCl}_3$ )  $\delta$  8.88 (d,  $J = 2.20$ , 1 H); 8.43-8.42 (m, 1 H); 7.75-7.74 (m, 2 H); 7.49-7.44 (m, 4 H); 6.87 (d,  $J = 8.79$ , 1 H); 5.15 (dd,  $J = 8.60$ , 3.66, 1 H); 4.02 (s, 3 H); 2.21-2.04 (m, 2 H); 1.26-1.21 (m, 2 H); 1.14 (t,  $J = 6.96$ , 3 H); 1.02 (d,  $J = 7.32$ , 3 H); 0.91 (d,  $J = 7.32$ , 3 H); 0.86 (d,  $J = 7.32$ , 3 H); 0.69 (d,  $J = 7.32$ , 3 H);  $^{13}\text{C}$  NMR (75 MHz,  $\text{CDCl}_3$ )  $\delta$  165.8, 164.8, 163.1, 155.1, 145.9, 143.2, 137.7, 128.7, 128.6, 128.5, 127.9, 125.0, 111.5, 110.7, 82.1, 53.6, 31.5, 17.5, 17.3, 17.2, 16.9, 14.4, 13.7, 10.1; IR (film): 2944, 2860, 1602, 1567, 1525, 1490, 1456, 1386, 1344, 1281, 1253, 1106, 1085, 1057, 1022, 987, 889, 833, 770, 708, 659  $\text{cm}^{-1}$ ; HRMS calcd for  $\text{C}_{26}\text{H}_{32}\text{N}_2\text{O}_2\text{Si}$  ( $\text{M}^+ + \text{H}$ ), 433.2311; found, 433.2330

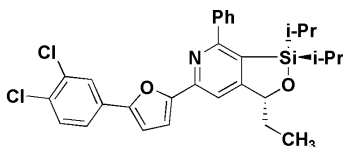

**5-(5-(3,4-dichlorophenyl)furan-2-yl)-3-ethyl-1,1-diisopropyl-7-phenyl-1,3-dihydro-[1,2]oxasilolo[3,4-c]pyridine (19)**  $^1\text{H}$  NMR (300 MHz,  $\text{CDCl}_3$ )  $\delta$  7.86 (d,  $J = 1.80$ , 1 H); 7.74-7.71 (m, 2 H); 7.59 (dd,  $J = 8.40$ , 1.80, 1 H); 7.56 (br s, 1 H); 7.50-7.43 (m, 4 H); 7.31 (d,  $J = 3.6$ , 1 H); 6.84 (d,  $J = 3.30$ , 1 H); 5.16 (dd,  $J = 8.7$ , 3.3, 1 H); 2.21-2.08 (m, 1 H); 1.74-1.64 (m, 1 H); 1.27-1.21 (m, 2 H); 1.16 (t,  $J = 7.20$ , 3 H); 1.03 (d,  $J = 7.20$ , 3 H); 0.87 (app t,  $J = 6.90$ , 6 H); 0.65 (d,  $J = 7.50$ , 3 H);  $^{13}\text{C}$  NMR (75 MHz,  $\text{CDCl}_3$ )  $\delta$  165.6, 163.3, 154.4, 152.1, 149.1, 143.1, 133.1, 131.4, 130.8, 130.4, 128.8, 128.5, 128.0, 125.6, 123.1, 111.8, 110.4, 109.1, 82.2, 31.5, 17.4, 17.3, 17.1, 16.8, 14.4, 13.7, 10.2; IR (film): 2952, 2891, 2865, 1783, 1622, 1591, 1578, 1539, 1483, 1461, 1391, 1352, 1243, 1104, 1070, 991, 939, 883, 822, 748, 700, 678  $\text{cm}^{-1}$ ; HRMS calcd for  $\text{C}_{30}\text{H}_{31}\text{Cl}_2\text{NO}_2\text{Si}$  ( $\text{M}^+ + \text{H}$ ), 536.1579; found, 536.1567

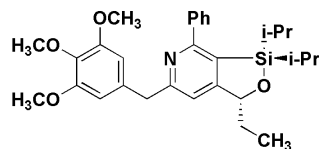

**3-ethyl-1,1-diisopropyl-7-phenyl-5-(3,4,5-trimethoxybenzyl)-1,3-dihydro-[1,2]oxasilolo[3,4-c]pyridine (20)**  $^1\text{H}$  NMR (500 MHz,  $\text{CDCl}_3$ )  $\delta$  7.64-7.63 (m, 2 H); 7.45 (t,  $J = 6.96$ , 2 H); 7.41 (d,  $J = 6.96$ , 1 H); 6.87 (s, 1 H); 6.57 (s, 2 H); 5.01 (dd,  $J = 8.60$ , 3.29, 1 H); 4.21-4.18 (m, 2 H); 3.85 (s, 3 H); 3.84 (s, 6 H); 1.94-1.89 (m, 2 H); 1.22-1.13 (m, 2 H); 1.06 (t,  $J = 7.32$ , 3 H); 0.98 (d,  $J = 7.32$ , 3 H); 0.85 (d,  $J = 7.32$ , 3 H); 0.82 (d,  $J = 7.69$ , 3 H); 0.63 (d,  $J = 7.69$ , 3 H);  $^{13}\text{C}$  NMR (75 MHz,  $\text{CDCl}_3$ )  $\delta$  165.4, 162.9, 161.3, 153.7, 153.2, 143.3, 137.9, 136.7, 135.0, 128.9, 127.9, 125.4, 124.4, 117.8, 115.1, 107.3, 105.2, 82.0, 60.4, 56.2, 44.8, 36.6, 31.6, 24.7, 21.0, 17.7, 17.5, 17.4, 17.2, 17.1, 16.7, 14.6, 14.2, 13.5; IR (film): 2943, 2865, 2839, 1743, 1587, 1570, 1539, 1509, 1465, 1417, 1374, 1326, 1235, 1191, 1126, 1061, 991, 883, 830, 704, 674  $\text{cm}^{-1}$ ; HRMS calcd for  $\text{C}_{30}\text{H}_{39}\text{NO}_4\text{Si}$  ( $\text{M}^+ + \text{H}$ ), 506.2726; found, 506.2709

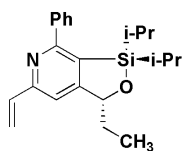

**3-ethyl-1,1-diisopropyl-7-phenyl-5-vinyl-1,3-dihydro-[1,2]oxasilolo[3,4-c]pyridine (21)**  $^1\text{H}$  NMR (300 MHz,  $\text{CDCl}_3$ )  $\delta$  7.68-7.65 (m, 2 H); 7.48-7.40 (m, 3 H); 7.13 (br s, 1 H); 6.92 (dd,  $J = 17.40, 10.80$ , 1 H); 6.35 (dd,  $J = 17.55, 1.50$ , 1 H); 5.54 (dd,  $J = 10.80, 1.20$ , 1 H); 5.07 (dd,  $J = 8.55, 3.30$ , 1 H); 2.06-1.96 (m, 1 H); 1.68-1.60 (m, 1 H); 1.25-1.16 (m, 2 H); 1.101 (t,  $J = 7.20$ , 3 H); 0.99 (d,  $J = 7.20$ , 3 H); 0.86 (d,  $J = 7.50$ , 3 H); 0.82 (d,  $J = 7.50$ , 3 H); 0.64 (d,  $J = 7.50$ , 3 H);  $^{13}\text{C}$  NMR (75 MHz,  $\text{CDCl}_3$ )  $\delta$  165.3, 163.1, 156.1, 143.4, 137.3, 128.6, 128.5, 128.0, 126.0, 118.8, 113.2, 82.0, 31.4, 17.4, 17.2, 17.1, 16.8, 14.3, 13.6, 10.1; IR (film): 2948, 2896, 2861, 1574, 1513, 1465, 1370, 1109, 1065, 1039, 987, 926, 883, 822, 761, 704, 674, 578  $\text{cm}^{-1}$ ; HRMS calcd for  $\text{C}_{22}\text{H}_{29}\text{NOSi}$  ( $\text{M}^+ + \text{H}$ ), 352.2096; found, 352.2102

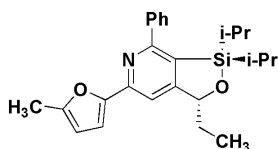

**3-ethyl-1,1-diisopropyl-5-(5-methylfuran-2-yl)-7-phenyl-1,3-dihydro-[1,2]oxasilolo[3,4-c]pyridine (22)**  $^1\text{H}$  NMR (300 MHz,  $\text{CDCl}_3$ )  $\delta$  7.71-7.68 (m, 2 H); 7.48-7.40 (m, 4 H); 7.09 (d,  $J = 3.00$ , 1 H); 6.14 (d,  $J = 3.00$ , 1 H); 5.10 (dd,  $J = 8.40, 3.30$ , 1 H); 2.41 (s, 3 H); 2.12-2.03 (m, 1 H); 1.78-1.60 (m, 1 H); 1.26-1.16 (m, 2 H); 1.11 (t,  $J = 7.20$ , 3 H); 1.01 (d,  $J = 7.20$ , 3 H); 0.85 (app t,  $J = 7.80$ , 6 H); 0.64 (d,  $J = 7.50$ , 3 H);  $^{13}\text{C}$  NMR (75 MHz,  $\text{CDCl}_3$ )  $\delta$  165.3, 163.2, 153.5, 152.5, 149.9, 143.4, 128.7, 128.6, 128.4, 128.0, 124.4, 110.6, 109.8, 108.4, 82.1, 31.3, 17.4, 17.3, 17.1, 16.8, 14.4, 13.9, 13.6, 10.1; IR (film): 2943, 2891, 2861, 1604, 1578, 1513, 1461, 1378, 1339, 1226, 1113, 1056, 1022, 996, 878, 830, 796, 752, 696, 665, 635  $\text{cm}^{-1}$

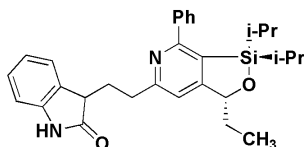

**3-(2-(3-ethyl-1,1-diisopropyl-7-phenyl-1,3-dihydro-[1,2]oxasilolo[3,4-c]pyridin-5-yl)ethyl)indolin-2-one (23)**  $^1\text{H}$  NMR (300 MHz,  $\text{CDCl}_3$ )  $\delta$  7.60-7.57 (m, 2 H); 7.50-7.42 (m, 3 H); 7.13-7.11 (m, 1 H); 7.01-6.90 (m, 2 H); 6.84 (br s, 1 H); 6.66-6.63 (m, 1 H); 4.92 (dd,  $J = 8.70, 3.30$ , 1 H); 4.40-4.25 (m, 2 H); 3.33 (t,  $J = 6.60$ , 2 H); 1.83-1.74 (m, 1 H); 1.43-1.33 (m, 1 H); 1.25 (m, 2 H); 1.18-1.07 (m, 2 H); 0.97-0.92 (m, 6 H); 0.82 (d,  $J = 7.50$ , 3 H); 0.76 (d,  $J = 7.50$ , 3 H); 0.59 (d,  $J = 7.50$ , 3 H);  $^{13}\text{C}$  NMR (75 MHz,  $\text{CDCl}_3$ )  $\delta$  165.5, 163.3, 158.1, 154.5, 143.2, 142.5, 131.4, 128.7, 128.6, 127.8, 125.1, 123.6, 122.0, 116.0, 109.8, 108.4, 81.8, 42.2, 36.4, 31.1, 17.3, 17.2, 17.1, 16.7, 14.2, 13.5, 9.9; IR (film): 2939, 2891, 2861, 1774, 1613, 1587, 1570, 1535, 1487, 1461, 1387, 1361, 1248, 1100, 1070, 983, 948, 874, 826, 752, 709, 665, 639  $\text{cm}^{-1}$

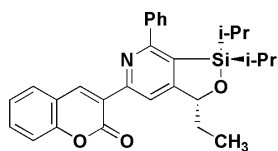

**3-(3-ethyl-1,1-diisopropyl-7-phenyl-1,3-dihydro-[1,2]oxasilolo[3,4-c]pyridin-5-yl)-2H-chromen-2-one (24)**  $^1\text{H}$  NMR (500 MHz,  $\text{CDCl}_3$ )  $\delta$  9.02 (s, 1 H); 8.30 (s, 1 H); 7.72 (dd,  $J = 8.24, 1.46$ , 2 H); 7.67 (dd,  $J =$

**Supporting Information, page 43**

7.69, 1.10, 1 H); 7.59-7.56 (m, 1 H); 7.52-7.49 (m, 2 H); 7.47-7.44 (m, 1 H); 7.40 (d,  $J = 8.42$ , 1 H); 7.32 (dt,  $J = 7.50$ , 1.10, 1 H); 5.17 (dd,  $J = 8.79$ , 2.93, 1 H); 2.14-2.08 (m, 1 H); 1.69-1.63 (m, 1 H); 1.26-1.18 (m, 2 H); 1.13 (m, 4 H); 1.02 (d,  $J = 7.32$ , 3 H); 0.90 (d,  $J = 7.32$ , 3 H); 0.85 (d,  $J = 7.69$ , 3 H); 0.68 (d,  $J = 7.32$ , 3 H);  $^{13}\text{C}$  NMR (75 MHz,  $\text{CDCl}_3$ )  $\delta$  165.9, 162.7, 160.4, 154.0, 151.3, 143.4, 143.0, 132.1, 129.0, 128.8, 128.7, 128.0, 127.2, 125.3, 124.6, 119.6, 116.4, 116.0, 82.4, 36.6, 31.4, 24.7, 23.3, 17.4, 17.2, 17.1, 16.8, 14.3, 13.6, 10.2; IR (film): 2944, 2860, 1721, 1604, 1574, 1526, 1456, 1378, 1348, 1248, 1213, 1156, 1096, 1056, 1009, 991, 917, 883, 822, 822, 761, 709, 670, 630  $\text{cm}^{-1}$ ; HRMS calcd for  $\text{C}_{29}\text{H}_{31}\text{NO}_3\text{Si}$  ( $\text{M}^+ + \text{H}$ ), 470.2151; found, 470.2158

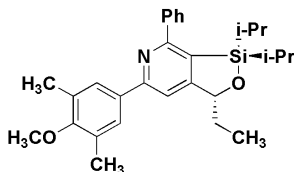

**3-ethyl-1,1-diisopropyl-5-(4-methoxy-3,5-dimethylphenyl)-7-phenyl-1,3-dihydro-[1,2]oxasilolo[3,4-c]pyridine (25)**  $^1\text{H}$  NMR (300 MHz,  $\text{CDCl}_3$ )  $\delta$  7.77-7.73 (m, 4 H); 7.49-7.41 (m, 4 H); 5.13 (dd,  $J = 8.40$ , 3.30, 1 H); 3.76 (s, 3 H); 2.37 (s, 6 H); 2.13-2.02 (m, 1 H); 1.72-1.62 (m, 1 H); 1.26-1.19 (m, 2 H); 1.12 (t,  $J = 7.50$ , 3 H); 1.01 (d,  $J = 7.20$ , 3 H); 0.90-0.84 (m, 6 H); 0.67 (d,  $J = 7.50$ , 3 H);  $^{13}\text{C}$  NMR (75 MHz,  $\text{CDCl}_3$ )  $\delta$  165.5, 163.0, 158.2, 157.6, 143.6, 135.0, 132.8, 131.1, 128.6, 128.5, 128.0, 127.8, 124.6, 112.2, 82.1, 59.7, 31.5, 30.9, 17.4, 17.3, 17.2, 16.8, 16.3, 16.0, 14.4, 13.6, 10.1; IR (film): 2943, 2865, 1591, 1574, 1526, 1491, 1465, 1409, 1357, 1230, 1152, 1104, 1061, 1013, 983, 922, 878, 826, 765, 700, 630  $\text{cm}^{-1}$ ; HRMS calcd for  $\text{C}_{29}\text{H}_{37}\text{NO}_2\text{Si}$  ( $\text{M}^+ + \text{H}$ ), 460.2672; found, 460.2685

**Representative 1-H & 13-C NMR Spectra for Pyridines synthesized in Table II:**

*Spectra for compounds 5, 22-23, & 25:*

**$^1\text{H}$  and  $^{13}\text{C}$  NMR spectra for pyridine products:**

| Page | subst | spectrum | Page | subst | spectrum |
|------|-------|----------|------|-------|----------|
| S-44 | 5     | 1H       | S-48 | 23    | 1H       |
| S-45 | 5     | 13C      | S-49 | 23    | 13C      |
| S-46 | 25    | 1H       | S-50 | 22    | 1H       |
| S-47 | 25    | 13C      | S-51 | 22    | 13C      |

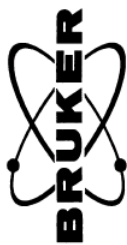

Current Data Parameters  
 NAME BLG-IV-185-C-F-2  
 EXPNO 1  
 PROCNO 1

F2 - Acquisition Parameters  
 Date\_ 20061027  
 Time 18.11  
 INSTRUM spect  
 PROBHD 5 mm QNP 1H/13  
 PULPROG zg30  
 TD 16384  
 SOLVENT CDCl3  
 NS 16  
 DS 2  
 SWH 4006.410 Hz  
 FIDRES 0.244532 Hz  
 AQ 2.0447731 sec  
 RG 574.7  
 DW 124.800 usec  
 DE 6.00 usec  
 TE 300.0 K  
 D1 1.00000000 sec  
 TDO 1

==== CHANNEL f1 =====  
 NUC1 1H  
 P1 7.00 usec  
 PL1 0.00 dB  
 SFO1 300.1318534 MHz

F2 - Processing parameters  
 SI 32768  
 SF 300.1300271 MHz  
 WDW EM  
 SSB 0  
 LB 0.30 Hz  
 GB 0  
 PC 1.00

PROTON16.bcb CDCl3 Z:\bgray 46

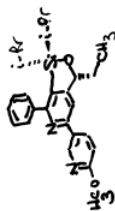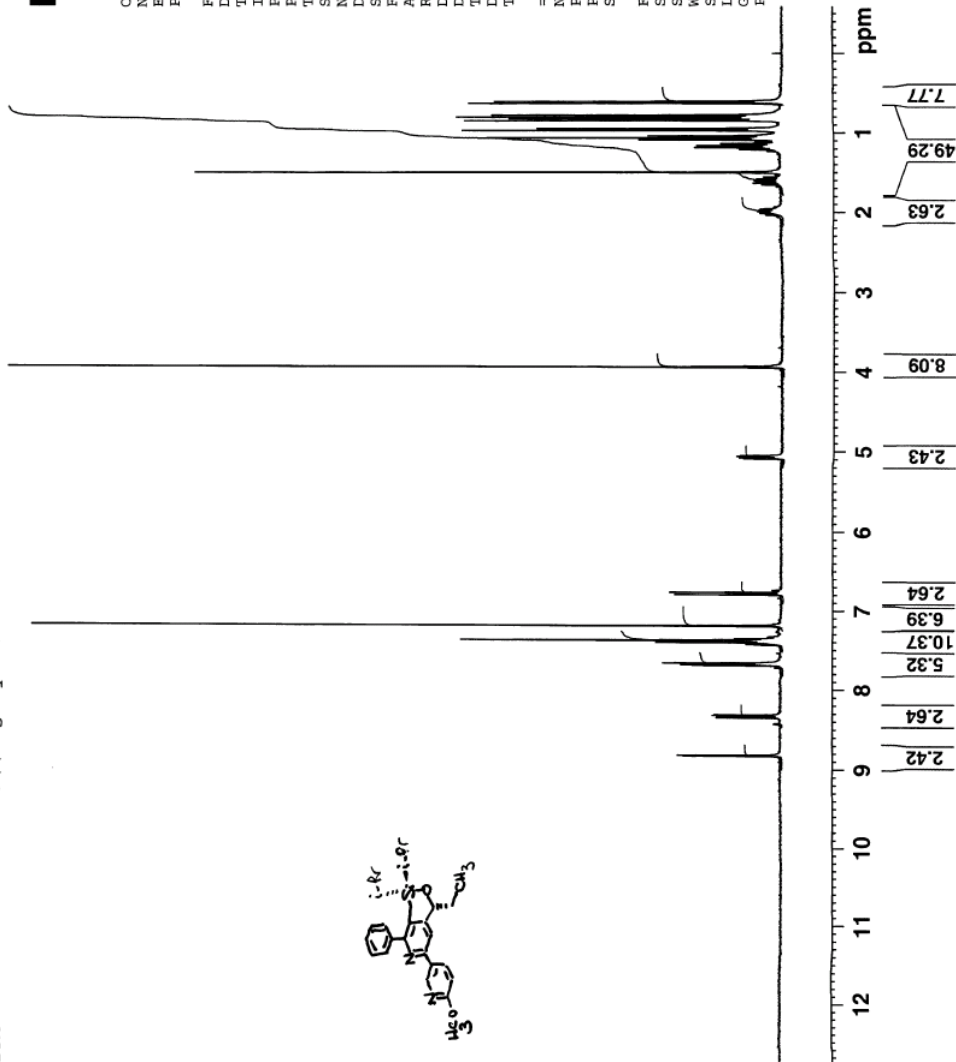

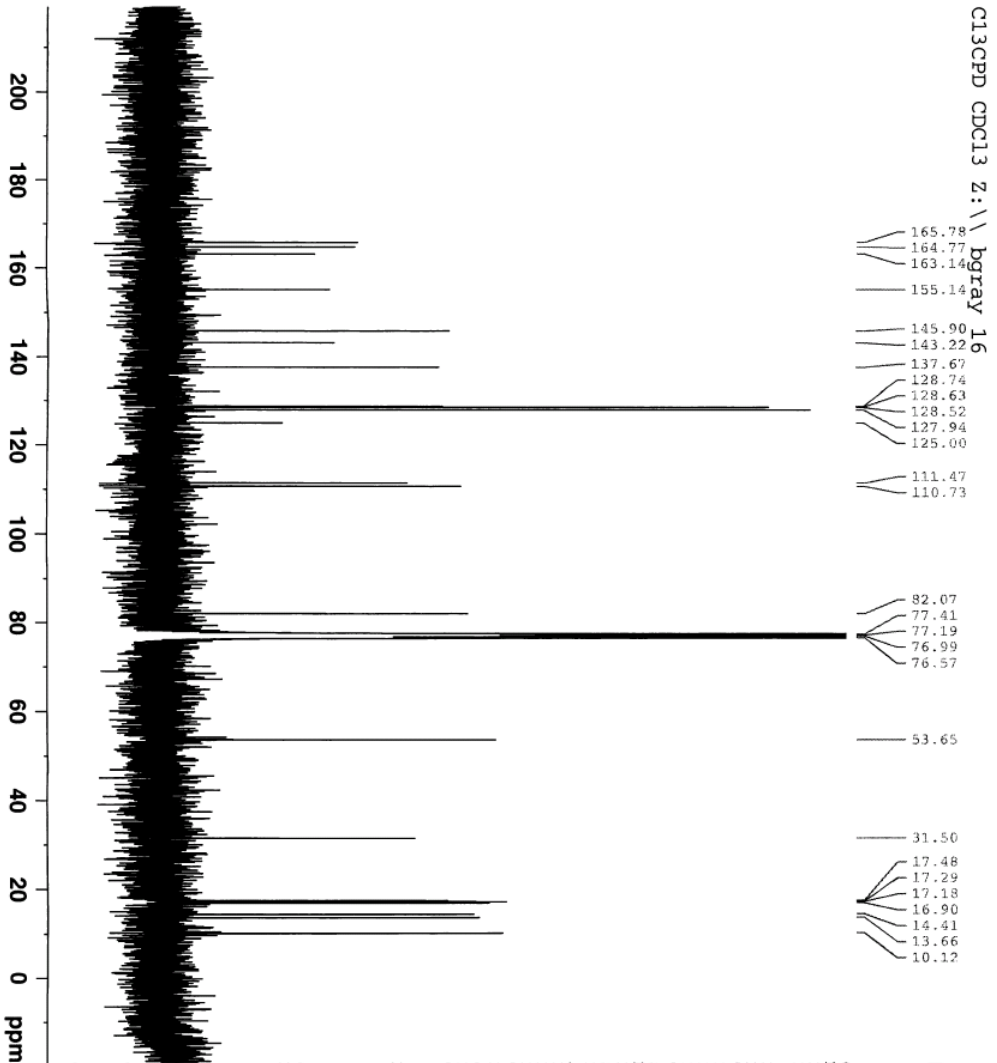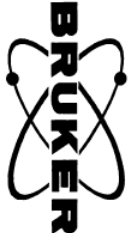

Current Data Parameters  
 NAME BLG-IV-185-C-F-2-13C  
 EXPNO 1  
 PROCNO 1

F2 - Acquisition Parameters

Date\_ 20061031  
 Time 5.10  
 INSTRUM spect  
 PROBHD 5 mm QNP 1H/13  
 PULPROG zgpg30  
 TD 65536  
 SOLVENT CDCl3  
 NS 5600  
 DS 4  
 SWH 17985.611 Hz  
 FIDRES 0.274439 Hz  
 AQ 1.8219508 sec  
 RG 1149.4  
 DW 27.800 usec  
 DE 6.00 usec  
 TE 300.0 K  
 D1 2.00000000 sec  
 d11 0.03000000 sec  
 DELTA 1.89999998 sec  
 TDO 1

==== CHANNEL F1 =====  
 NUC1 13C  
 P1 7.75 usec  
 PL1 0.00 dB  
 SFO1 75.4752953 MHz

==== CHANNEL F2 =====  
 CPDPRG2 waltz16  
 NUC2 1H  
 PCPD2 70.00 usec  
 PL2 0.00 dB  
 PL12 20.00 dB  
 PL13 20.00 dB  
 SFO2 300.1312005 MHz

F2 - Processing parameters  
 SI 32768  
 SF 75.4677490 MHz  
 WDW EM  
 SSB 0  
 LB 1.00 Hz  
 GB 0  
 PC 1.40

PROTON16.bcb CDCl3 Z:\ \ bgray 68

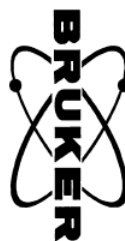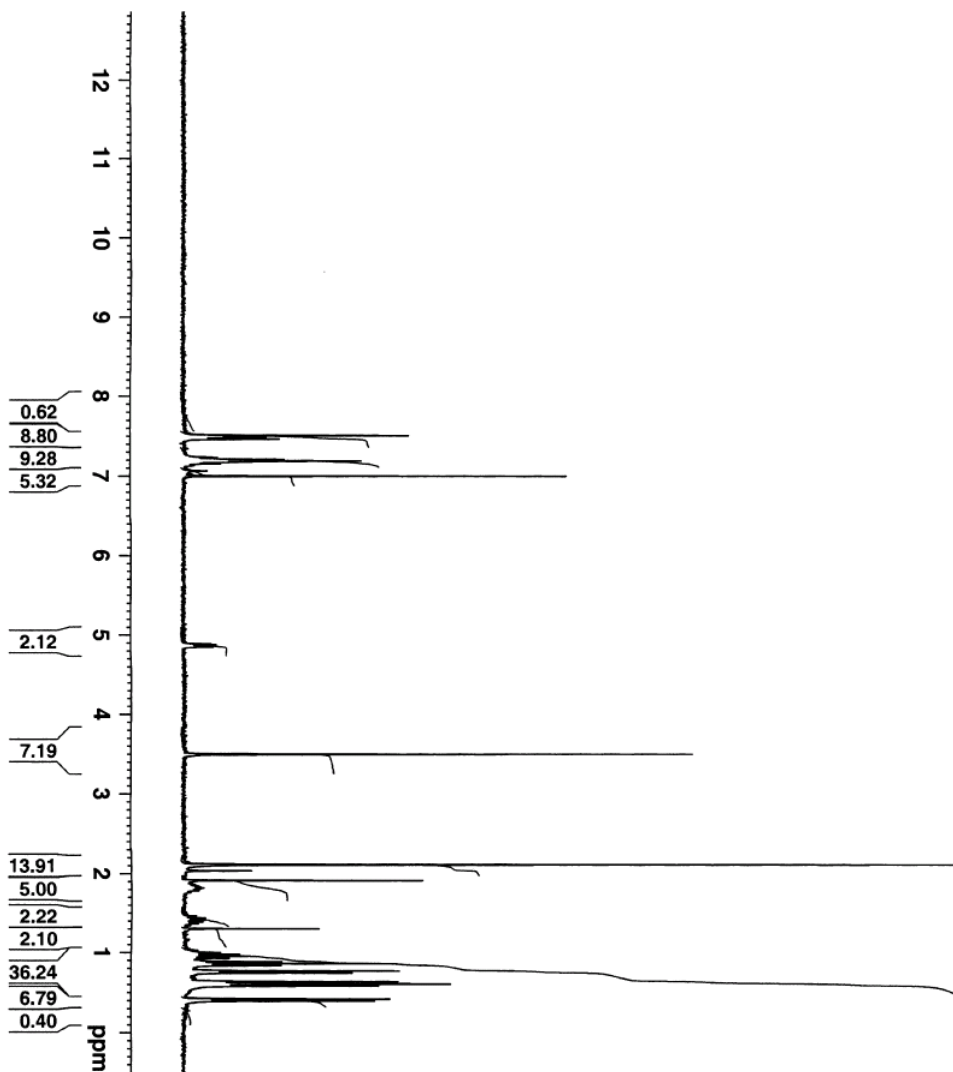

Current Parameters  
 NAME BLG-IV-202-D-F-1  
 EXPNO 1  
 PROCNO 1

F2 - Acquisition Parameters

Date\_ 20061212  
 Time 18.29  
 INSTRUM spect  
 PROBHD 5 mm QNP 1H/13  
 PULPROG zg30  
 TD 16384  
 SOLVENT CDCl3  
 NS 16  
 DS 2  
 SMH 4006.410 Hz  
 FIDRES 0.244532 Hz  
 AQ 2.0447731 sec  
 RG 1824.6  
 DW 124.800 usec  
 DE 6.00 usec  
 TE 300.0 K  
 D1 1.00000000 sec  
 TD0 1

===== CHANNEL f1 =====  
 NUCL1 1H  
 P1 7.00 usec  
 PL1 0.00 dB  
 SFO1 300.1318534 MHz

F2 - Processing parameters  
 SI 32768  
 SF 300.1300000 MHz  
 WDW EM  
 SSB 0  
 LB 0.30 Hz  
 GB 0  
 PC 1.00

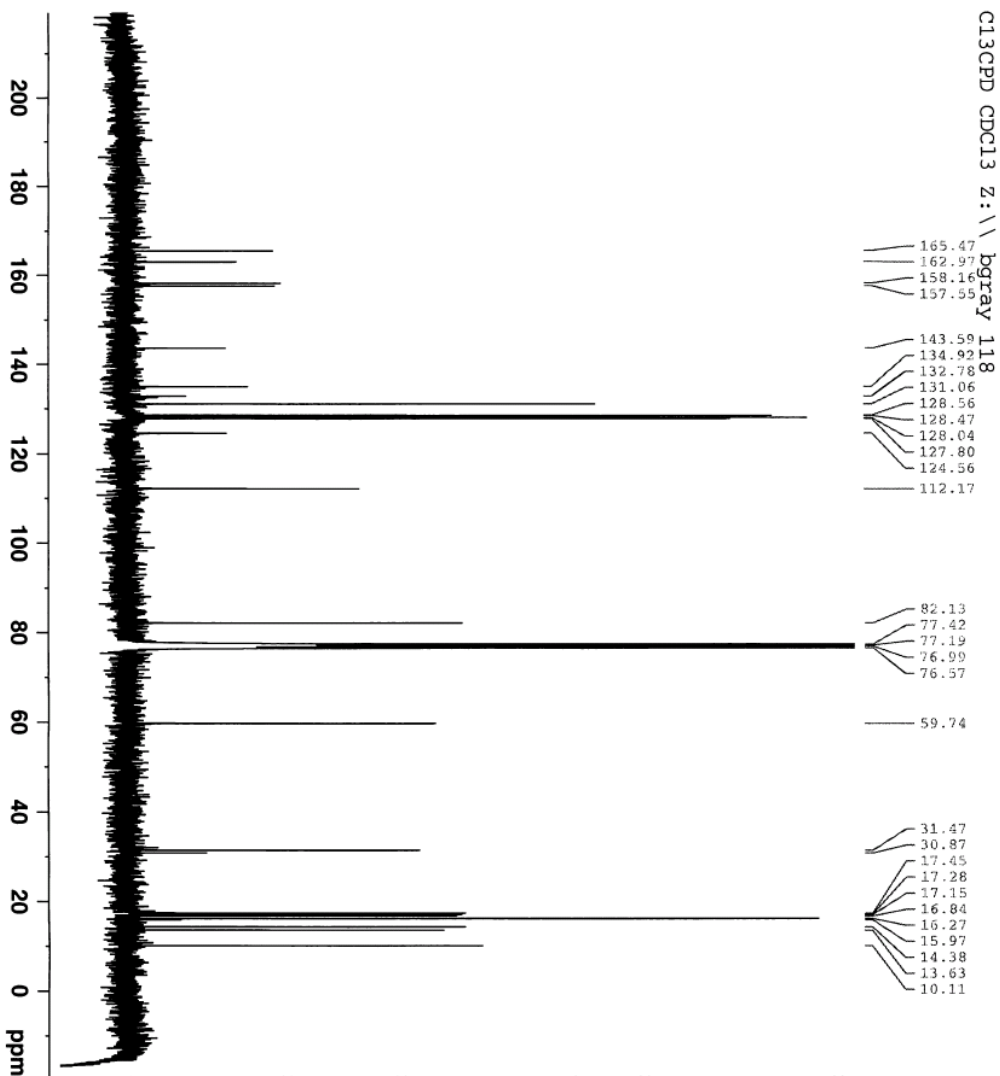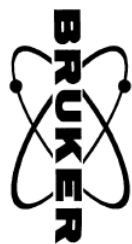

Current Data Parameters  
 NAME BLG-IV-202-D-1-1-13C  
 EXPNO 1  
 PROCNO 1

F2 - Acquisition Parameters  
 Date\_ 20061228  
 Time 7.43  
 INSTRUM spect  
 PROBHD 5 mm QNP 1H/13  
 PULPROG zgpg30  
 TD 65536  
 SOLVENT CDCl3  
 NS 8000  
 DS 4  
 SWH 17985.611 Hz  
 FIDRES 0.274439 Hz  
 AQ 1.8219508 sec  
 RG 1024  
 LW 27.800 usec  
 DE 6.00 usec  
 TE 300.0 K  
 D1 2.00000000 sec  
 d11 0.03000000 sec  
 DELTA 1.89999998 sec  
 TD0 1

==== CHANNEL f1 =====  
 NUC1 13C  
 P1 7.75 usec  
 PL1 0.00 dB  
 SFO1 75.4752953 MHz

==== CHANNEL f2 =====  
 CPDPRG2 waltz16  
 NUC2 1H  
 PCPD2 70.00 usec  
 PL2 0.00 dB  
 PL12 20.00 dB  
 PL13 20.00 dB  
 SFO2 300.1312005 MHz

F2 - Processing parameters  
 SI 32768  
 SF 75.4677490 MHz  
 WDW EM  
 SSB 0  
 LB 1.00 Hz  
 GB 0  
 PC 1.40

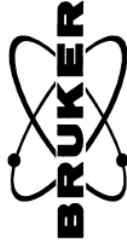

Current Data Parameters  
NAME WCB-I-124-B-F-3  
EXNO 1  
PROCNO 1

F2 - Acquisition Parameters  
Date\_ 20061219  
Time 14.42  
INSTRUM spect  
PROBHD 5 mm QNP 1H/13  
PULPROG zg30  
TD 16384  
SOLVENT CDCl3  
NS 16  
DS 2  
SWH 4006.410 Hz  
FIDRES 0.244532 Hz  
AQ 2.0447731 sec  
RG 574.7  
DW 124.800 usec  
DE 6.00 usec  
TE 300.0 K  
D1 1.00000000 sec  
TDO 1

==== CHANNEL f1 =====  
NUC1 1H  
P1 7.00 usec  
PL1 0.00 dB  
SFO1 300.1318534 MHz

F2 - Processing parameters  
SI 32768  
SF 300.1300000 MHz  
WDW EM  
SSB 0  
LB 0.30 Hz  
GB 0  
PC 1.00

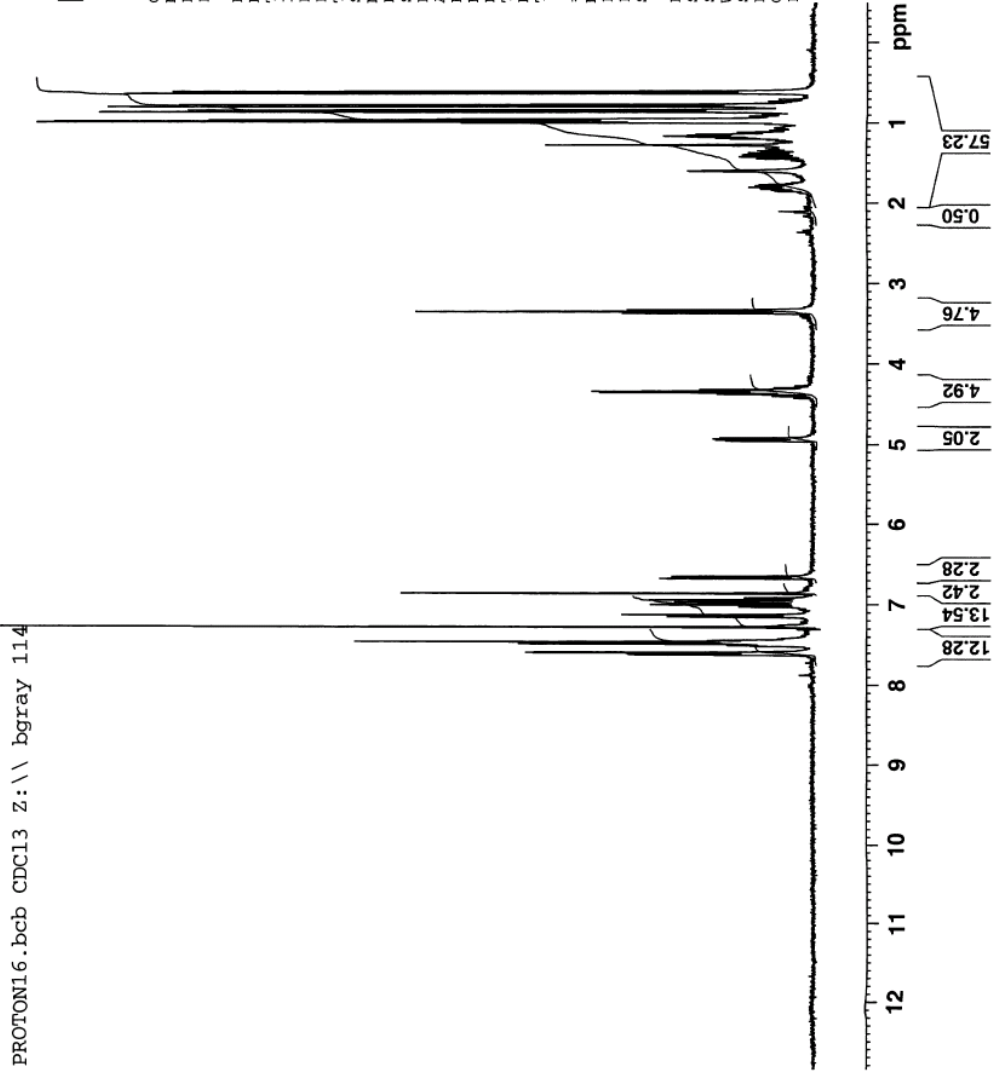



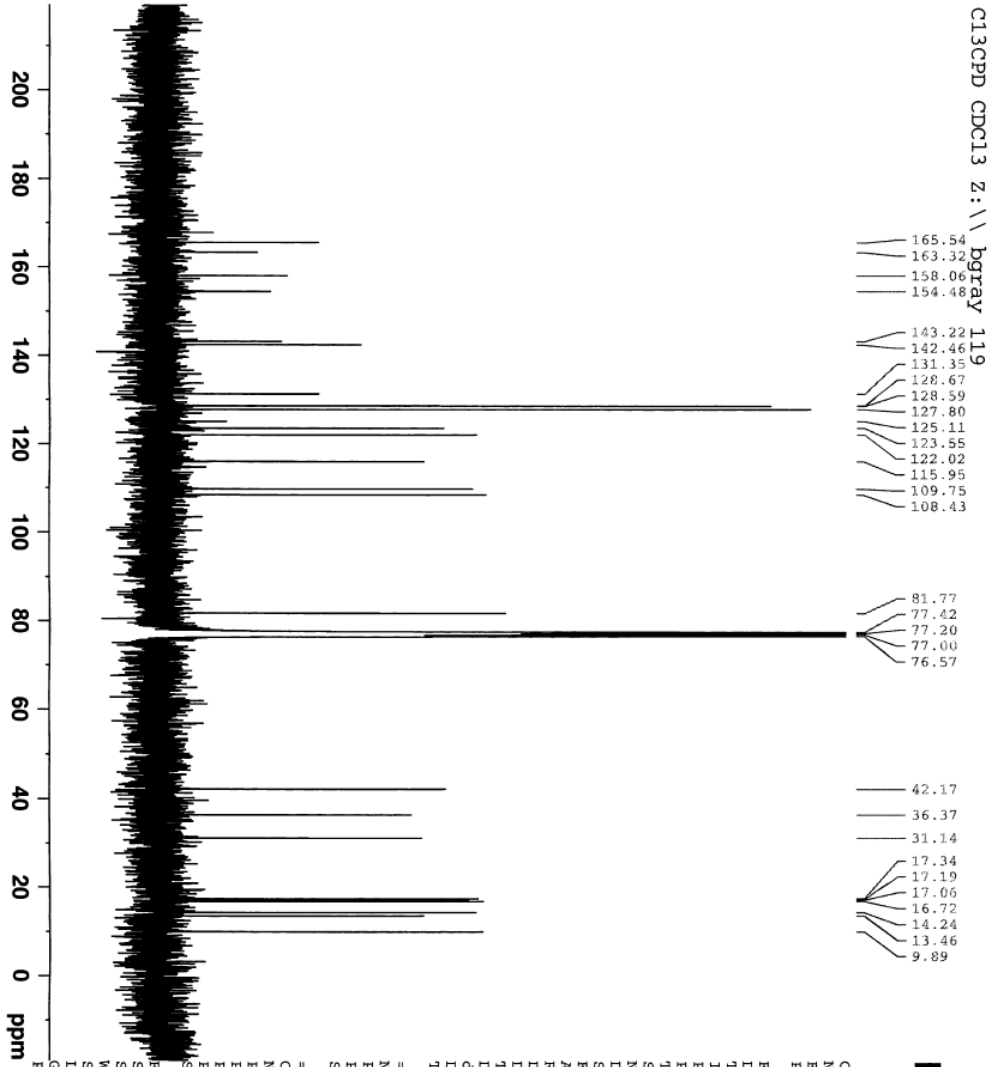

C13CPD CDCl3 Z:\\ bgray 119

165.54  
163.32  
158.06  
154.48

143.22  
142.46  
131.35  
128.67  
128.59  
127.80  
125.11  
123.55  
122.02  
115.95  
109.75  
108.43

81.77  
77.42  
77.20  
77.00  
76.57

42.17  
36.37  
31.14  
17.34  
17.19  
17.06  
16.72  
14.24  
13.46  
9.89

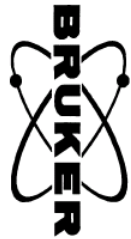

Current Data Parameters  
NAME WCB-I124-B-F-3-13C  
EXPNO 1  
PROCNO 1

F2 - Acquisition Parameters

Date\_ 20061223  
Time 16.42  
INSTRUM spect  
PROBHD 5 mm QNP 1H/13  
PULPROG zgpg30  
TD 65536  
SOLVENT CDCl3  
NS 8000

DS 4  
SWH 17985.611 Hz  
FIDRES 0.274439 Hz  
AQ 1.8219508 sec  
RG 1024  
DE 27.800 usec  
TE 300.0 K  
D1 2.00000000 sec  
d11 0.03000000 sec  
DELTA 1.89999998 sec  
TDO 1

==== CHANNEL f1 =====  
NUC1 13C  
P1 7.75 usec  
PL1 0.00 dB  
SFO1 75.4752953 MHz

==== CHANNEL f2 =====  
CPDPRG2 waltz16  
NUC2 1H  
PCPD2 70.00 usec  
PL2 0.00 dB  
PL12 20.00 dB  
PL13 20.00 dB  
SFO2 300.1312005 MHz

F2 - Processing parameters  
SI 32768  
WDW EM  
SSB 0  
LB 1.00 Hz  
GB 0  
PC 1.40

PROTON16.bcb CDCl3 Z: \\ bgray 3

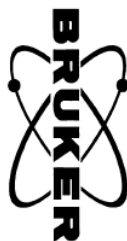

Current Data Parameters  
 NAME WCB-I-125-A-F  
 EXPNO 1  
 PROCNO 1

F2 - Acquisition Parameters  
 Date\_ 20061221  
 Time 18.06

INSTRUM spect  
 PROBHD 5 mm QNP 1H/13  
 PULPROG zg30  
 TD 16384  
 SOLVENT CDCl3  
 NS 16

DS 2  
 SWH 4006.410 Hz  
 FIDRES 0.244532 Hz  
 AQ 2.044731 sec  
 RG 512  
 DW 124.800 usec  
 DE 6.00 usec  
 TE 300.0 K  
 D1 1.00000000 sec  
 TDO 1

==== CHANNEL f1 =====  
 NUCL1 1H  
 P1 7.00 usec  
 PL1 0.00 dB  
 SFO1 300.1318534 MHz

F2 - Processing parameters  
 SI 32768  
 SF 300.1300276 MHz  
 WDW EM  
 SSB 0  
 LB 0.30 Hz  
 GB 0  
 PC 1.00

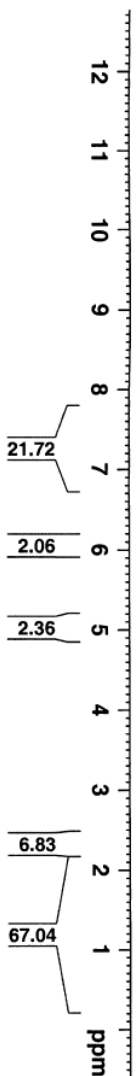

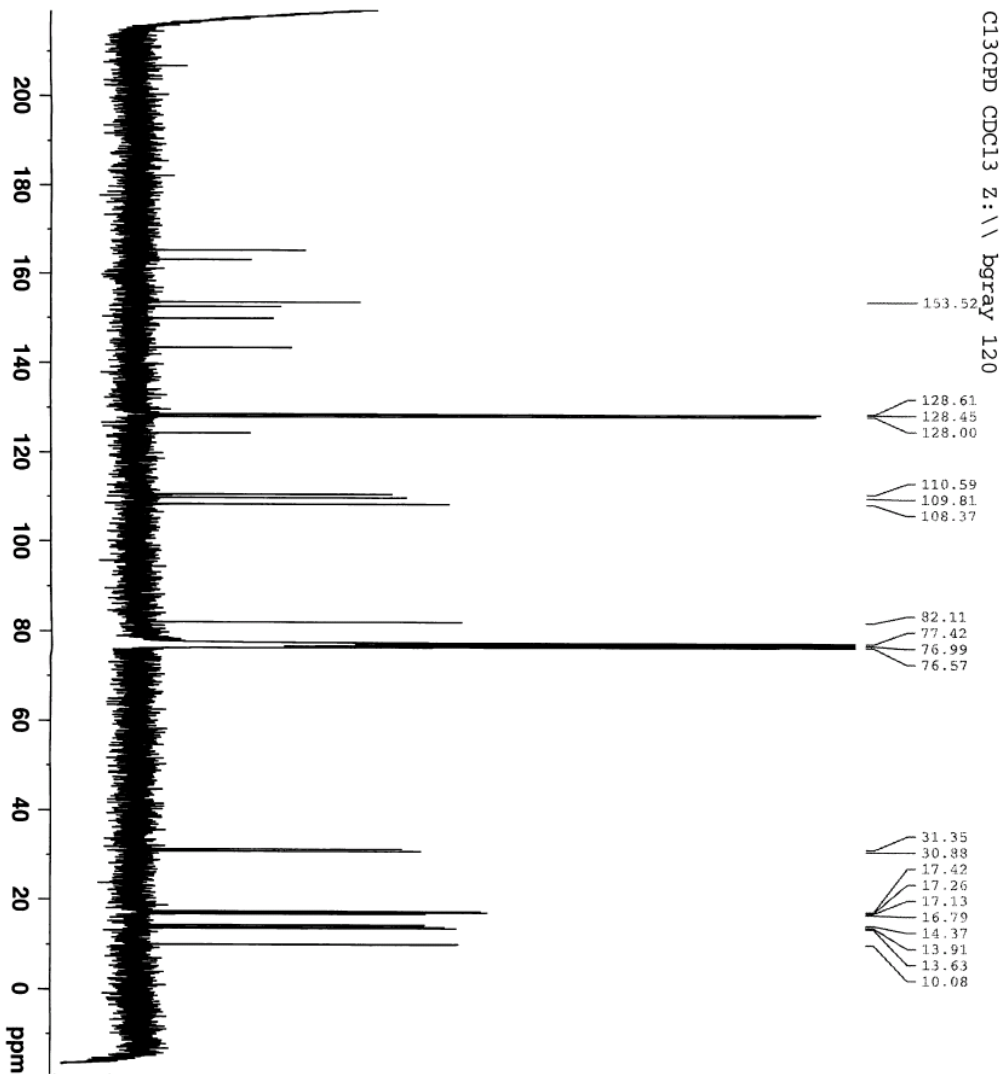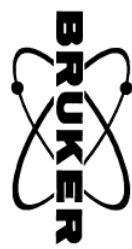

Current Data Parameters  
 NAME MCB-I-125-A-F-13C  
 EXPNO 1  
 PROCNO 1

F2 - Acquisition Parameters  
 Date\_ 20061224  
 Time 0.21

INSTRUM spect  
 PROBHD 5 mm QNP 1H/13  
 PULPROG zgpg30  
 TD 65536  
 SOLVENT CDCl3  
 NS 7000

DS 4  
 SWH 17985.611 Hz  
 FIDRES 0.274439 Hz  
 AQ 1.8219508 sec

RG 812.7  
 DW 27.800 usec  
 DE 6.00 usec  
 TE 300.0 K

D1 2.00000000 sec  
 d11 0.03000000 sec  
 DELTA 1.89999998 sec  
 TD0 1

==== CHANNEL f1 =====  
 NUC1 13C  
 P1 7.75 usec  
 PL1 0.00 dB  
 SFO1 75.4752953 MHz

==== CHANNEL f2 =====  
 CPDPRG2 waltz16  
 NUC2 1H  
 PCPD2 70.00 usec  
 PL2 0.00 dB  
 PL12 20.00 dB  
 PL13 20.00 dB  
 SFO2 300.1312005 MHz

F2 - Processing parameters  
 SI 32768  
 SF 75.4677490 MHz  
 WDW EM  
 SSB 0  
 GB 1.00 Hz  
 PC 1.40

*Supporting Information, page 52*

**Representative procedure for diyne screening (Table III):**

Diyne **36-41** (0.033 mmol, 1 equiv) were placed into an oven-dried sealed tube equipped with magnetic stirrer and dissolved in degassed THF (0.67 ml). 5-methoxy-2-pyridinecarbonitrile (6.7 mg, 0.050 mmol) was added as a solid to the stirring solution. After complete dissolution, a solution of cyclopentadienylcobalt(I) dicarbonyl (1.8 mg, 0.010 mmol, 30 mol %) in degassed xylenes (50  $\mu$ l) was introduced by syringe, giving a pale yellow solution. The sealed tube was immediately submerged into an oil bath preheated to 140 °C. After 24 h, the dark brown solution was cooled to ambient temperature and loaded onto a 4 g silica plug. Filtration was performed using an *Isco Combiflash* system using a gradient solvent commencing with hexanes and ending with 1/1 hexanes/ethyl acetate (total volume of approximately 40 ml), which effectively removed insoluble cobalt byproducts. Pooled fractions were concentrated *in vacuo* and assayed for conversion by  $^1\text{H}$  NMR. Purification was performed by silica gel chromatography using an *Isco Combiflash* 12 g column with 20:1 hexanes:EtOAc as eluant, providing pyridines **42-48**.

**Representative spectral data for diyne screening experiments (Table III):**

*$^1\text{H}$  NMR spectra for selected entries:*

| <i>page</i> | <i>table 3 entry</i> | <i>pyridine</i> | <i><math>\delta_{\text{subst}}</math> (ppm)</i> | <i><math>\delta_{\text{product}}</math> (ppm)</i> | <i>conversion</i> |
|-------------|----------------------|-----------------|-------------------------------------------------|---------------------------------------------------|-------------------|
| S-53        | 1                    | <b>42</b>       | 4.6 ppm                                         | 5.0 ppm                                           | 84%               |
| S-54        | 3                    | <b>43/44</b>    | 4.5 ppm                                         | 5.2 ppm                                           | >95%              |
| S-55        | 5                    | <b>45</b>       | 4.6 ppm                                         | 5.1 ppm                                           | 57%               |
| S-56        | 7                    | <b>46</b>       | 5.0 ppm                                         | 5.6 ppm                                           | 68%               |

Conversions were determined on the basis of integration between the methine proton H(A) in the substrate and the equivalent methine proton H(A) in pyridine adducts. See above table for specific chemical shifts for each reaction.



Solvent: CDCl<sub>3</sub> – Frequency: 300 MHz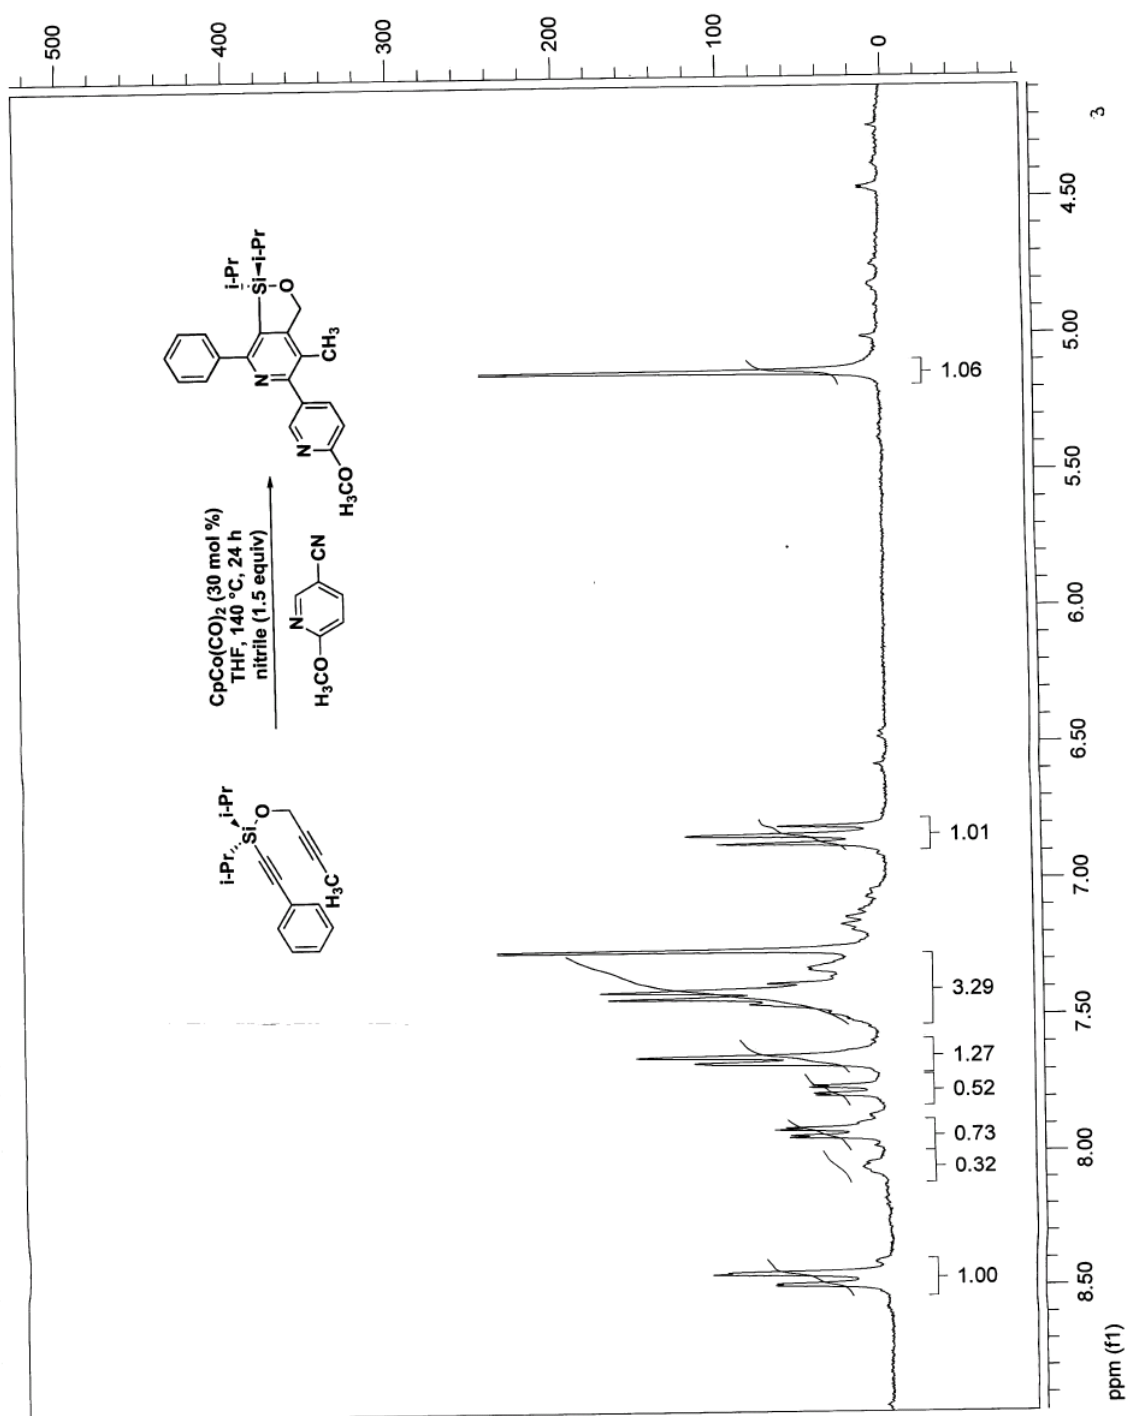

Solvent: CDCl<sub>3</sub> – Frequency: 300 MHz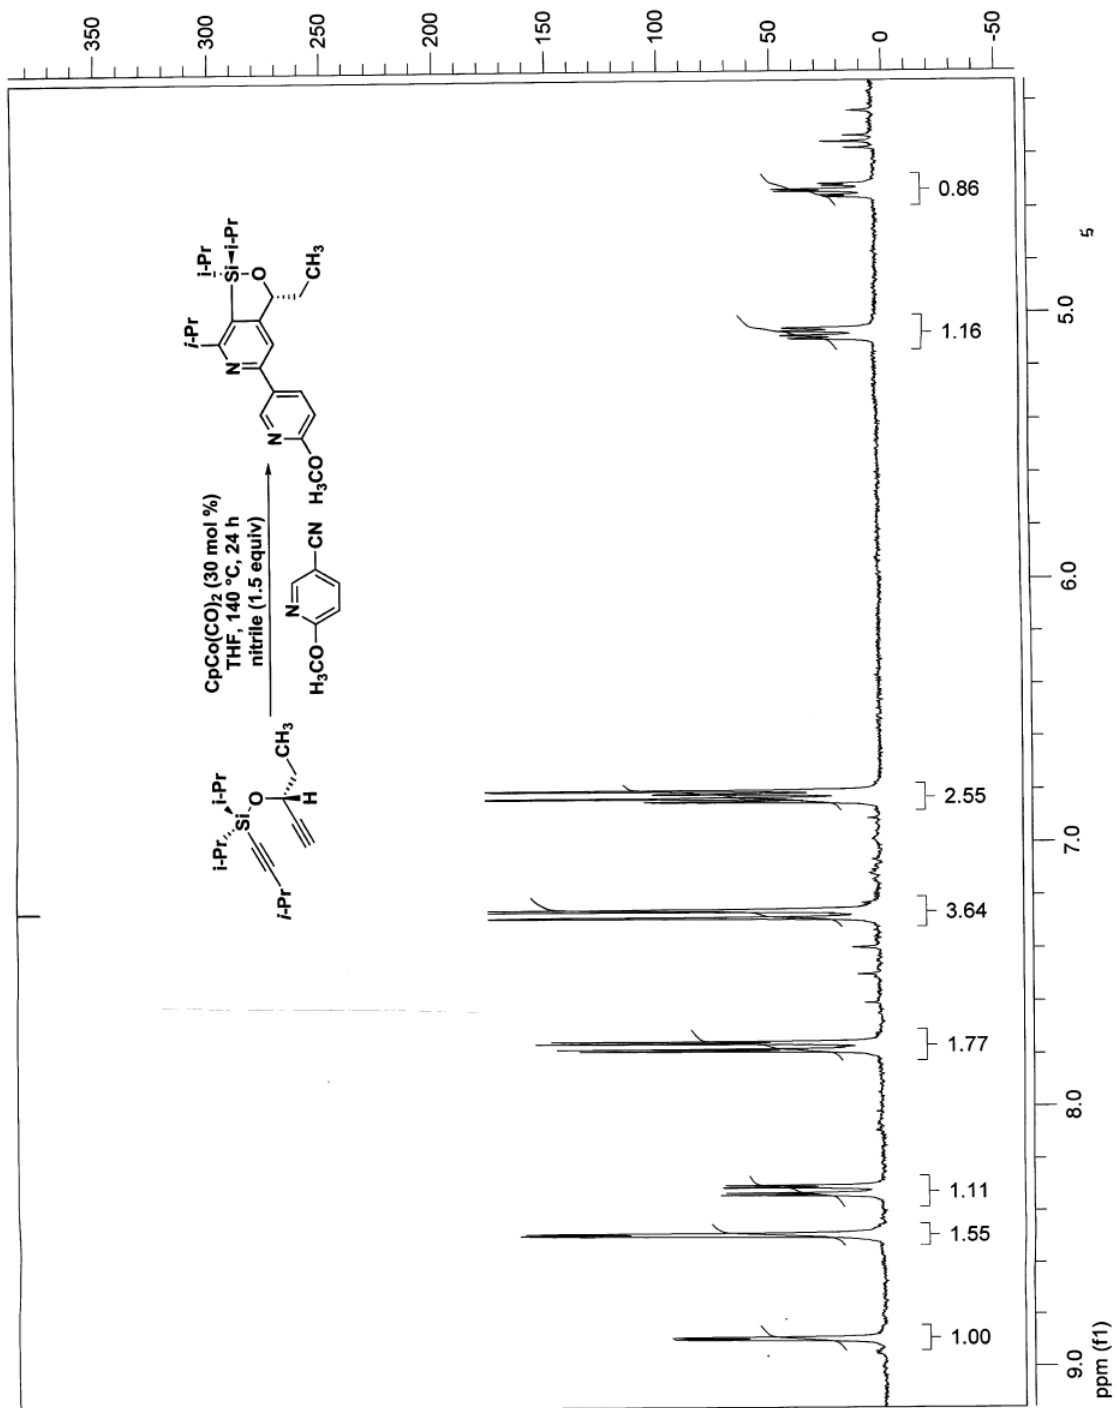

Solvent: CDCl<sub>3</sub> – Frequency: 300 MHz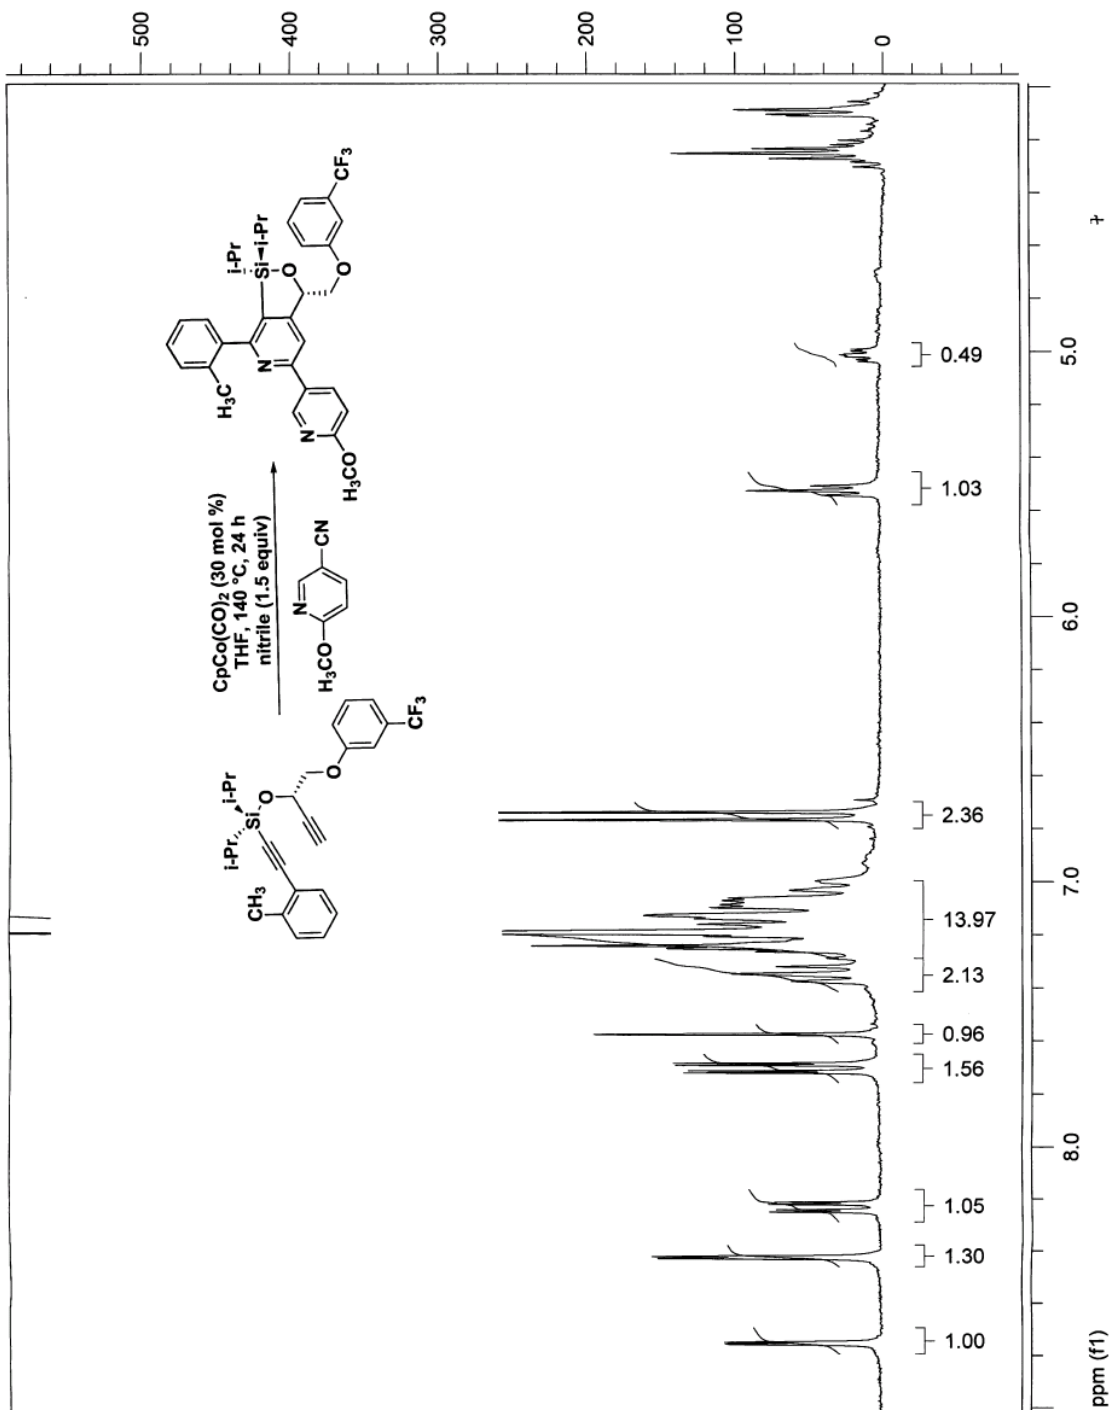



## Characterization data for pyridines (Table III):

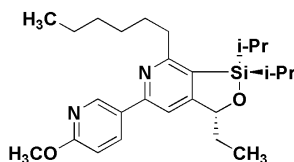

**3-ethyl-7-hexyl-1,1-diisopropyl-5-(6-methoxypyridin-3-yl)-1,3-dihydro-[1,2]oxasilolo[3,4-c]pyridine (42)** <sup>1</sup>H NMR (500 MHz, CDCl<sub>3</sub>) δ 8.82 (d, *J* = 2.20, 1 H); 8.28 (dd, *J* = 8.42, 2.56, 1 H); 7.27 (s, 1 H); 6.83 (d, *J* = 8.42, 1 H); 5.08 (dd, *J* = 8.60, 3.66, 1 H); 4.00 (s, 3 H); 2.80 (t, *J* = 8.05, 2 H); 2.02-1.97 (m, 1 H); 1.87 (app quint, *J* = 7.69, 2 H); 1.64-1.58 (m, 1 H); 1.45-1.40 (m, 2 H); 1.36-1.33 (m, 4 H); 1.31-1.26 (m, 2 H); 1.14 (d, *J* = 7.32, 3 H); 1.08 (t, *J* = 7.32, 3 H); 1.03-0.98 (m, 9 H); 0.90 (t, *J* = 6.96, 3 H); <sup>13</sup>C NMR (75 MHz, CDCl<sub>3</sub>) δ 163.7, 162.8, 156.5, 147.6, 140.0, 130.0, 121.8, 110.3, 82.7, 53.6, 41.0, 31.8, 30.4, 30.0, 29.6, 22.6, 18.1, 17.5, 17.4, 17.2, 16.6, 14.0, 13.8, 13.3, 10.8; IR (film): 2937, 2860, 1609, 1574, 1532, 1490, 1456, 1393, 1351, 1281, 1106, 1064, 1029, 987, 878, 826, 761, 661 cm<sup>-1</sup>; HRMS calcd for C<sub>26</sub>H<sub>40</sub>N<sub>2</sub>O<sub>2</sub>Si (M<sup>+</sup> + H), 441.2937; found, 441.2955

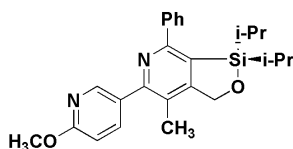

**1,1-diisopropyl-5-(6-methoxypyridin-3-yl)-4-methyl-7-phenyl-1,3-dihydro-[1,2]oxasilolo[3,4-c]pyridine (43)** <sup>1</sup>H NMR (300 MHz, CDCl<sub>3</sub>) δ 8.48-8.45 (m, 1 H); 7.92 (dt, *J* = 7.50, 2.40, 1 H); 7.68-7.62 (m, 2 H); 7.49-7.38 (m, 3 H); 6.86 (d, *J* = 8.70, 1 H); 5.14 (s, 2 H); 4.00 (s, 3 H); 2.50 (s, 3 H); 1.30-1.19 (m, 2 H); 0.98 (d, *J* = 7.20, 3 H); 0.92 (t, *J* = 7.80, 3 H); 0.77 (d, *J* = 7.50, 3 H); 0.67 (d, *J* = 7.50, 3 H); IR (film): 2958, 2868, 1749, 1616, 1560, 1511, 1461, 1404, 1374, 1352, 1283, 1252, 1122, 1065, 1026, 926, 870, 835, 774, 704, 656 cm<sup>-1</sup>; HRMS calcd for C<sub>25</sub>H<sub>30</sub>N<sub>2</sub>O<sub>2</sub>Si (M<sup>+</sup> + H), 419.2155; found, 419.2151

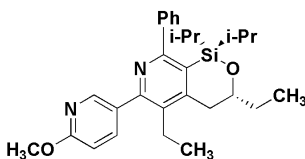

**3,5-diethyl-1,1-diisopropyl-6-(6-methoxypyridin-3-yl)-8-phenyl-3,4-dihydro-1H-[1,2]oxasilino[3,4-c]pyridine (47)** <sup>1</sup>H NMR (500 MHz, CDCl<sub>3</sub>) δ 8.32 (d, *J* = 2.56, 1 H); 7.74 (dd, *J* = 8.42, 2.56, 1 H); 7.44-7.42 (m, 2 H); 7.38-7.36 (m, 3 H); 6.80 (d, *J* = 8.42, 1 H); 3.97 (s, 3 H); 3.89-3.84 (m, 1 H); 3.04 (dd, *J* = 16.11, 1.83, 1 H); 2.71 (q, *J* = 7.32, 2 H); 2.64 (dd, *J* = 15.74, 9.88, 1 H); 1.62 (quint, *J* = 6.96, 2 H); 1.56-1.51 (m, 2 H); 1.12 (t, *J* = 7.32, 3 H); 1.05-1.02 (m, 5 H); 0.90 (m, 4 H); 0.85 (d, *J* = 7.69, 3 H); 0.71 (d, *J* = 7.32, 3 H); <sup>13</sup>C NMR (75 MHz, CDCl<sub>3</sub>) δ 163.6, 161.8, 155.9, 155.8, 146.7, 143.6, 139.6, 132.9, 130.8, 128.9, 128.2, 128.0, 126.4, 110.3, 73.3, 53.5, 36.7, 31.4, 22.3, 18.6, 18.0, 17.7, 17.4, 15.1, 15.0, 14.8, 10.0; IR (film): 2951, 2868, 1602, 1567, 1532, 1490, 1462, 1386, 1288, 1127, 1071, 1029, 917, 882, 833, 770, 742, 700, 631 cm<sup>-1</sup>; HRMS calcd for C<sub>29</sub>H<sub>38</sub>N<sub>2</sub>O<sub>2</sub>Si (M<sup>+</sup> + H), 475.2781; found, 475.2787

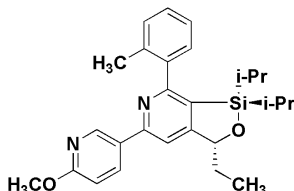

**(3)-3-ethyl-1,1-diisopropyl-5-(6-methoxypyridin-3-yl)-7-o-tolyl-1,3-dihydro-[1,2]oxasilolo[3,4-c]pyridine (48)** <sup>1</sup>H NMR (300 MHz, CDCl<sub>3</sub>) δ 8.82 (d, *J* = 2.40, 1 H); 8.30 (dd, *J* = 8.70, 2.70, 1 H); 7.43 (br s, 1 H); 7.31-7.23 (m, 4 H); 6.82 (d, *J* = 8.70, 1 H); 5.15 (dd, *J* = 8.70, 2.70, 1 H); 3.99 (s, 3 H); 2.31 (s, 3 H); 2.11-1.98 (m, 1 H); 1.73-1.63 (m, 1 H); 1.16-1.09 (m, 5 H); 0.93-0.85 (m, 6 H); 0.74 (d, *J* = 7.20, 3 H); 0.61 (d, *J* = 7.50, 3 H); <sup>13</sup>C NMR (75 MHz, CDCl<sub>3</sub>) δ 165.6, 164.7, 164.3, 154.6, 146.1, 145.9, 142.7, 137.8, 136.3, 130.7, 128.8, 128.4, 128.2, 126.6, 125.7, 125.6, 111.4, 110.7, 82.3, 53.6, 31.4, 20.1, 17.0, 17.0, 16.8, 16.2, 13.7, 13.4, 13.0, 10.2; IR (film): 2948, 2870, 1604, 1570, 1526, 1500, 1461, 1387, 1343, 1287, 1261, 1104, 1083, 1061, 1030, 987, 887, 865, 822, 756, 665 cm<sup>-1</sup>; HRMS calcd for C<sub>27</sub>H<sub>34</sub>N<sub>2</sub>O<sub>2</sub>Si (M<sup>+</sup> + H), 447.2468; found, 447.2452

**Representative Spectra for Pyridines synthesized in Table III:**

*Spectra for compounds 42-44 & 46-48:*

| page | Pyridine     | spectrum | page | pyridine  | spectrum |
|------|--------------|----------|------|-----------|----------|
| 59   | <b>42</b>    | 1H       | 61   | <b>46</b> | 1H       |
| 60   | <b>43/44</b> | 1H       | 62   | <b>47</b> | 1H       |
|      |              |          | 63   | <b>48</b> | 1H       |

PROTON16.bcb CDCl3 Z:\\ wdrown 91

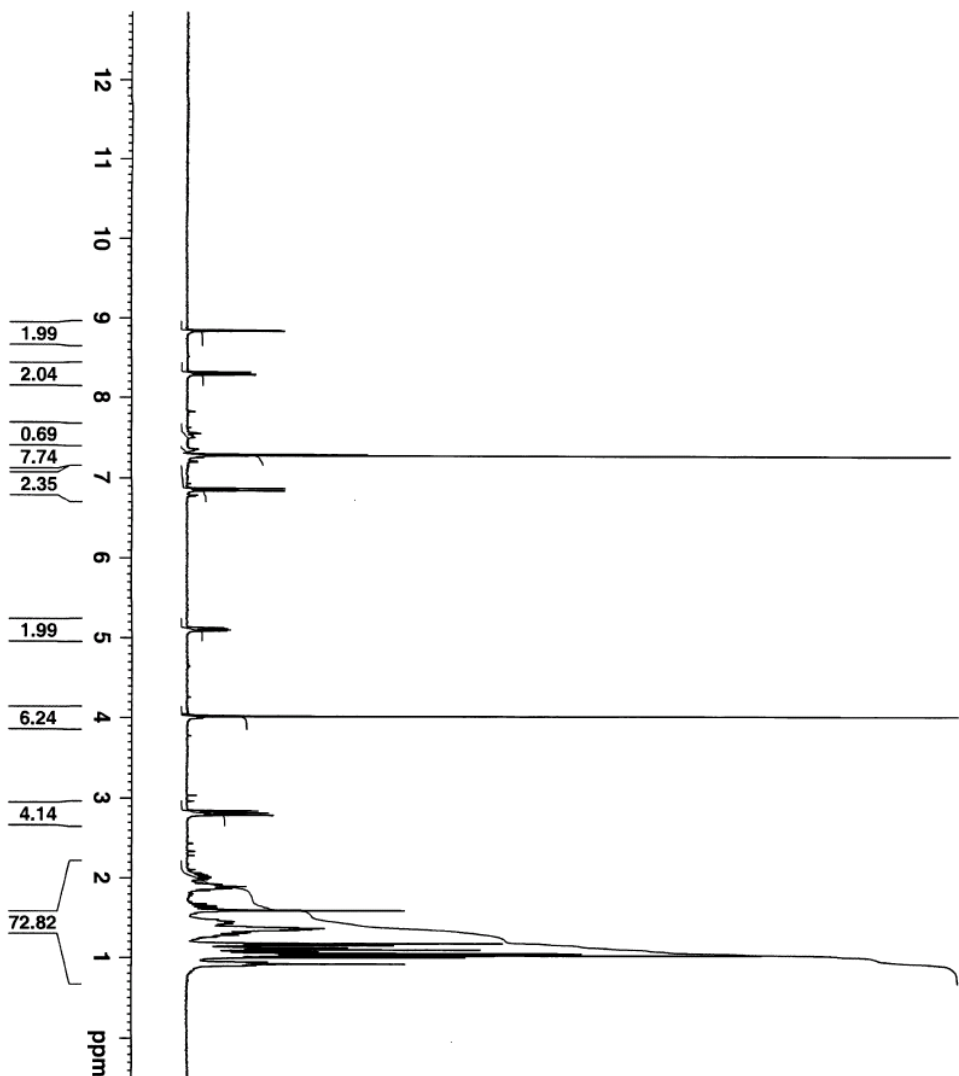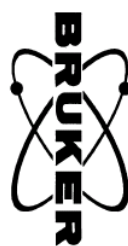

Current Data Parameters  
 NAME WCB-I-118-B-F-1  
 EXPNO 1  
 PROCNO 1

F2 - Acquisition Parameters

Date\_ 20061120  
 Time 11.08  
 INSTRUM spect  
 PROBHD 5 mm QNP 1H/13  
 PULPROG zg30  
 TD 16384  
 SOLVENT CDCl3  
 NS 16  
 DS 2  
 SWH 4006.410 Hz  
 FIDRES 0.244532 Hz  
 AQ 2.044731 sec  
 RG 574.7  
 DW 124.800 usec  
 DE 6.00 usec  
 TE 300.0 K  
 D1 1.00000000 sec  
 TDO 1

==== CHANNEL f1 =====

NUC1 1H  
 P1 7.00 usec  
 PL1 0.00 dB  
 SFO1 300.1318534 MHz

F2 - Processing Parameters

SI 32768  
 SF 300.1300000 MHz  
 WDW EM  
 SSB 0  
 GB 0  
 PC 1.00

PROTON16.bcb CDCl3 Z:\ \ bgray 118

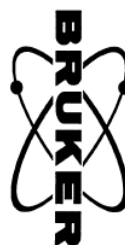

Current Data Parameters  
 NAME WCB-I-119-D-F-3  
 EXPNO 2  
 PROCNO 1

F2 - Acquisition Parameters  
 Date\_ 20061129  
 Time 14.02

INSTRUM spect  
 PROBHD 5 mm QNP 1H/13  
 PULPROG zg30  
 TD 16384  
 SOLVENT CDCl3  
 NS 16  
 DS 2

SWH 4006.410 Hz  
 FIDRES 0.244532 Hz  
 AQ 2.044731 sec  
 RG 574.7  
 DW 124.800 usec  
 DE 6.00 usec  
 TE 300.0 K  
 D1 1.00000000 sec  
 TD0 1

==== CHANNEL f1 =====  
 NUCl 1H  
 P1 7.00 usec  
 PL1 0.00 dB  
 SFO1 300.1318534 MHz

F2 - Processing parameters  
 SI 32768  
 SF 300.1300277 MHz  
 WDW EM  
 SSB 0  
 LB 0.30 Hz  
 GB 0  
 PC 1.00

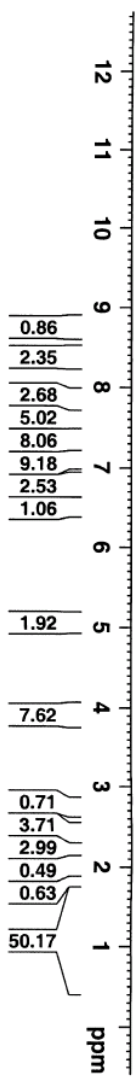

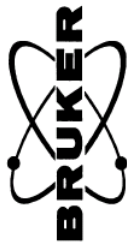

Current Data Parameters  
 NAME WCB-I-119-F-3  
 EXPNO 1  
 PROCNO 1

F2 - Acquisition Parameters  
 Date\_ 20061130  
 Time 11.24  
 INSTRUM spect  
 PROBHD 5 mm QNP 1H/13  
 PULPROG zg30  
 TD 16384  
 SOLVENT CDCl3  
 NS 16  
 DS 2  
 SWH 4006.410 Hz  
 FIDRES 0.244532 Hz  
 AQ 2.044731 sec  
 RG 574.7  
 DW 124.800 usec  
 DE 6.00 usec  
 TE 300.0 K  
 D1 1.00000000 sec  
 TDO 1

==== CHANNEL f1 =====  
 NUC1 1H  
 P1 7.00 usec  
 PL1 0.00 dB  
 SFO1 300.1318534 MHz

F2 - Processing parameters  
 SI 32768  
 SF 300.1300282 MHz  
 WDW EM  
 SSB 0  
 LB 0.30 Hz  
 GB 0  
 PC 1.00

PROTON16.bcb CDCl3 Z:\\ bgray 105

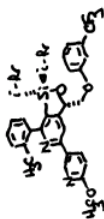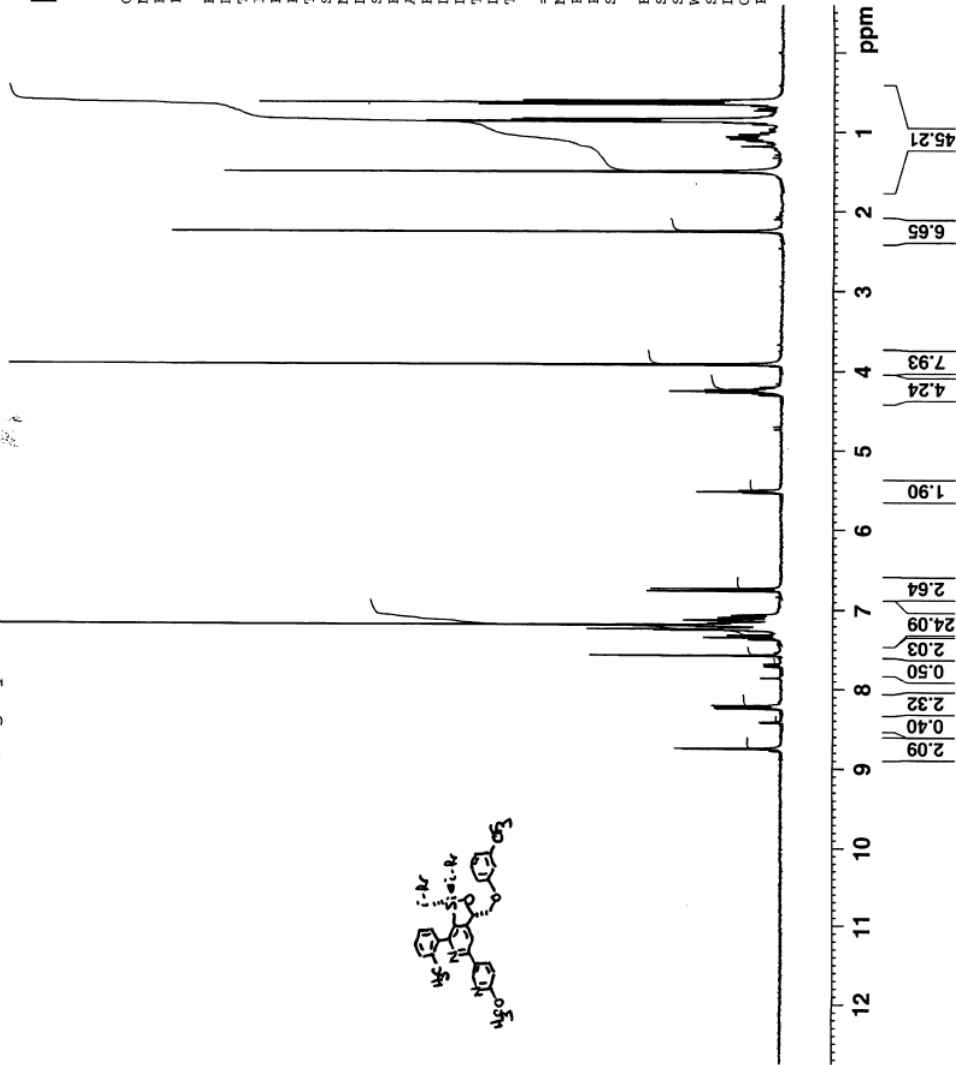

PROTON16.pcb CDCl3 Z:\ \ bgray 5

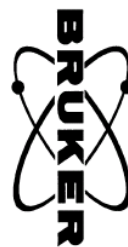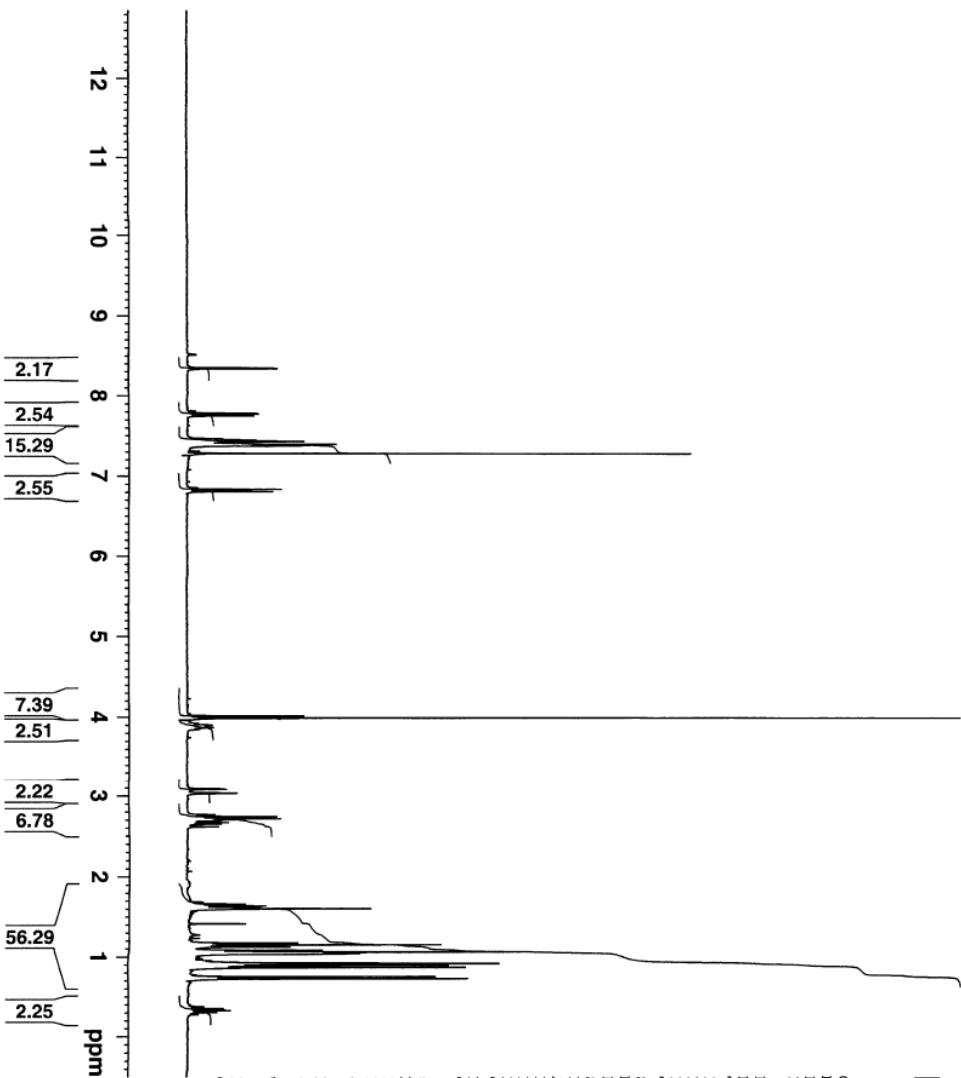

```

Current Data Parameters
NAME      WCB-I-118-E-F-3
EXPNO     1
PROCNO    1

F2 - Acquisition Parameters
Date_     20061120
Time      14.41
INSTRUM   spect
PROBHD    5 mm QNP 1H/13
PULPROG   zg30
TD        16384
SOLVENT   CDCl3
NS        16
DS        2
SMH       4006.410 Hz
FIDRES    0.244532 Hz
AQ        2.044731 sec
RG        512
DE        124.800 usec
TE        300.0 K
D1        1.00000000 sec
TD0       1

===== CHANNEL f1 =====
NUC1      1H
P1        7.00 usec
PL1       0.00 dB
SFO1     300.1318534 MHz

F2 - Processing parameters
SI        32768
SF        300.1300000 MHz
WDW       EM
SSB       0
LB        0.30 Hz
GB        0
PC        1.00
    
```

PROTON16.bcb CDCl3 Z:\\ bgray 107

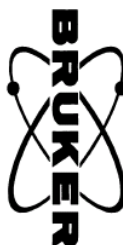

Current Data Parameters  
 NAME BLG-IV-198-B-F-3  
 EXPRNO 1  
 PROCNO 1

F2 - Acquisition Parameters  
 Date\_ 20061129  
 Time 16.14  
 INSTRUM spect  
 PROBHD 5 mm QNP 1H/13  
 PULPROG zg30  
 TD 16384  
 SOLVENT CDCl3  
 NS 16  
 DS 2  
 SMH 4006.410 Hz  
 FIDRES 0.244532 Hz  
 AQ 2.044731 sec  
 RG 645.1  
 DM 124.800 usec  
 DE 6.00 usec  
 TE 300.0 K  
 D1 1.00000000 sec  
 TDO 1

==== CHANNEL f1 =====  
 NUCL1 1H  
 P1 7.00 usec  
 PL1 0.00 dB  
 SFO1 300.1318534 MHz  
 F2 - Processing parameters  
 SI 32768  
 SF 300.1300265 MHz  
 WDW EM  
 SSB 0  
 LB 0.30 Hz  
 GB 0  
 PC 1.00

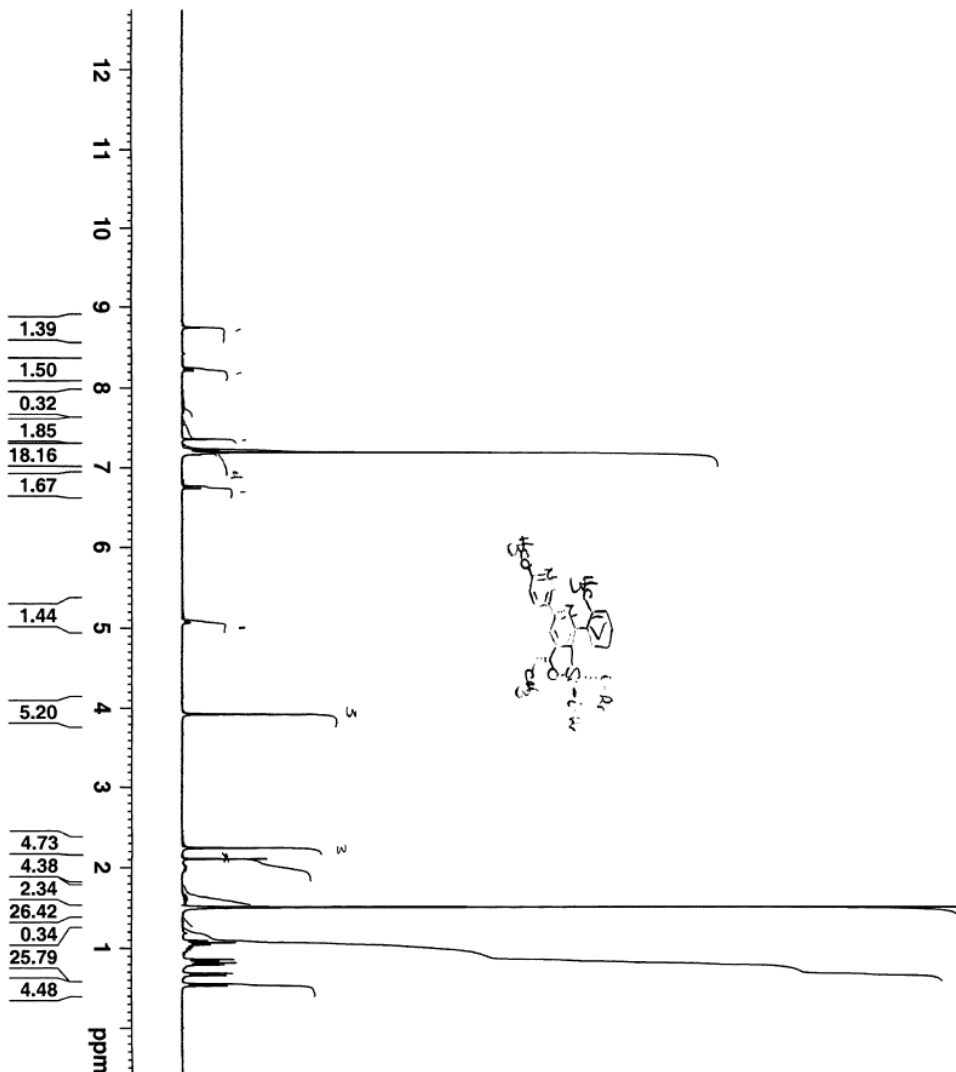

Representative <sup>1</sup>H NMR & HRMS data for compounds screened (Figure 2):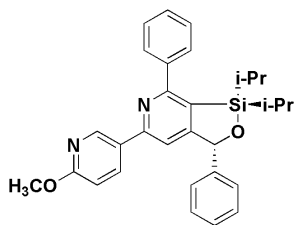

**(R)-1,1-diisopropyl-5-(6-methoxypyridin-3-yl)-3,7-diphenyl-1,3-dihydro-[1,2]oxasilolo[3,4-c]pyridine (BLG-IV-198-C)** <sup>1</sup>H NMR (300 MHz, CDCl<sub>3</sub>) δ 8.76 (d, *J* = 2.40, 1 H); 8.30 (dd, *J* = 8.70, 2.40, 1 H); 7.81-7.78 (m, 2 H); 7.51-7.48 (m, 3 H); 7.38 (m, 5 H); 7.20 (s, 1 H); 6.79 (d, *J* = 8.70, 1 H); 6.15 (s, 1 H); 3.96 (s, 3 H); 1.44-1.34 (m, 1 H); 1.31-1.24 (m, 1 H); 1.08 (d, *J* = 7.20, 3 H); 0.98 (d, *J* = 7.20, 3 H); 0.89 (d, *J* = 7.80, 3 H); 0.83 (d, *J* = 7.50, 3 H); HRMS calcd for C<sub>30</sub>H<sub>32</sub>N<sub>2</sub>O<sub>2</sub>Si (M<sup>+</sup> + H), 481.2311; found, 481.2317

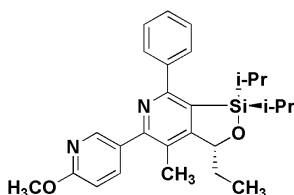

**3-ethyl-1,1-diisopropyl-5-(6-methoxypyridin-3-yl)-4-methyl-7-phenyl-1,3-dihydro-[1,2]oxasilolo[3,4-c]pyridine (BLG-IV-198-D)** <sup>1</sup>H NMR (300 MHz, CDCl<sub>3</sub>) δ 8.46 (d, *J* = 2.40, 1 H); 7.92 (dd, *J* = 8.55, 2.40, 1 H); 7.66-7.63 (m, 2 H); 7.46-7.38 (m, 3 H); 6.85 (d, *J* = 8.40, 1 H); 5.14-5.10 (m, 1 H); 4.00 (s, 3 H); 2.33 (s, 3 H); 2.17-2.07 (m, 1 H); 1.22 (t, *J* = 7.20, 3 H); 1.16 (d, *J* = 6.90, 3 H); 1.08 (d, *J* = 7.20, 3 H); 0.70 (d, *J* = 7.20, 3 H); 0.45 (d, *J* = 7.50, 3 H); HRMS calcd for C<sub>27</sub>H<sub>34</sub>N<sub>2</sub>O<sub>2</sub>Si (M<sup>+</sup> + H), 447.2468; found, 447.2454

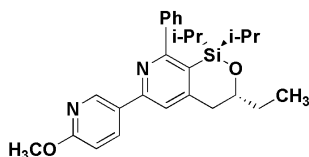

**3-ethyl-1,1-diisopropyl-6-(6-methoxypyridin-3-yl)-8-phenyl-3,4-dihydro-1H-[1,2]oxasilino[3,4-c]pyridine (WCB-I-118-C)** <sup>1</sup>H NMR (500 MHz, CDCl<sub>3</sub>) δ 8.81 (d, *J* = 2.20, 1 H); 8.34 (dd, *J* = 8.79, 2.20, 1 H); 7.52-7.50 (m, 2 H); 7.43-7.42 (m, 3 H); 7.39 (s, 1 H); 6.81 (d, *J* = 8.42, 1 H); 3.99 (s, 3 H); 3.92-3.90 (m, 1 H); 2.85-2.84 (m, 2 H); 1.60-1.55 (m, 2 H); 1.04-1.00 (m, 6 H); 0.96-0.92 (m, 2 H); 0.90-0.89 (m, 3 H); 0.86 (d, *J* = 7.32, 3 H); 0.65 (d, *J* = 7.69, 3 H); HRMS calcd for C<sub>27</sub>H<sub>34</sub>N<sub>2</sub>O<sub>2</sub>Si (M<sup>+</sup> + H), 447.2468; found, 447.2451

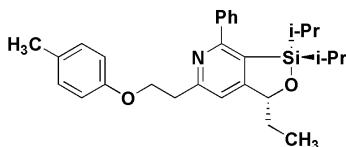

**3-ethyl-1,1-diisopropyl-7-phenyl-5-(2-(p-tolxyloxy)ethyl)-1,3-dihydro-[1,2]oxasilolo[3,4-c]pyridine (BLG-IV-196-B)** <sup>1</sup>H NMR (300 MHz, CDCl<sub>3</sub>) δ 7.61-7.59 (m, 2 H); 7.46-7.36 (m, 3 H); 7.08-7.05 (m, 3 H); 6.82 (d, 8.40, 2 H); 5.06 (dd, *J* = 8.55, 3.30, 1 H); 4.41 (dt, *J* = 6.60, 1.80, 2 H); 3.33 (t, *J* = 6.60, 2 H); 2.27 (s, 3 H); 2.03-1.95 (m, 1 H); 1.66-1.58 (m, 1 H); 1.21-1.14 (m, 2 H); 1.08 (t, *J* = 7.20, 2 H); 0.98 (d, *J* = 7.20, 3 H); 0.85-0.81 (m, 7 H); 0.63 (d, *J* = 7.50, 3 H); IR (film): 2952, 2865, 1617, 1587, 1570, 1504,



***Supporting Information, page 65***

1461, 1383, 1287, 1243, 1178, 1104, 1065, 1035, 987, 878, 817, 761, 700, 665, 513, 465  $\text{cm}^{-1}$ ; HRMS calcd for  $\text{C}_{29}\text{H}_{37}\text{NO}_2\text{Si}$  ( $\text{M}^+ + \text{H}$ ), 460.2672; found, 460.2651

**Regiochemistry of nitrile addition to silyl-tethered diynes**

1D nOe studies performed on compound **21**:

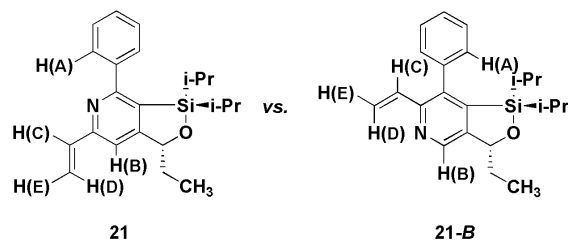

| entry | H irradiated | observed nOe |
|-------|--------------|--------------|
| 1     | H(A)         | None         |
| 2     | H(B)         | None         |
| 3     | H(C)         | H(E)         |
| 4     | H(D)         | H(E)         |
| 5     | H(D)         | H(B)         |
| 6     | H(E)         | H(D)         |

The structure of this compound is therefore designated as **21**:

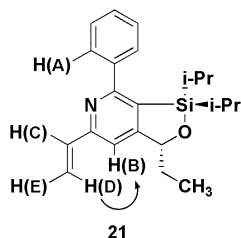

**Experimental Procedures for Screening Experiments:**

*Materials, cell culturing methods, and imaging procedures:*

**Materials:** The EGF domain of Neuregulin 1β1 (corresponding to amino acid residues 176 – 246 of Heregulin-1β1), was expressed and purified from *E. coli* (R&D Systems; #396-HB) and reconstituted in phosphate-buffered saline (PBS) with 0.1% bovine serum albumin as a non-specific carrier and frozen in aliquots at -20 °C.

**Cell culturing:** PC12-ErbB4-GFP and PC12-GFP cells were maintained in RPMI 1640 media (Gibco; 22400) containing 10% heat inactivated horse serum (Gibco; 26050), 5% heat inactivated fetal bovine serum (Gibco; 16140) and 750 μg/ml gentamicin (Gibco; 15750) referred to here as RPMI+. Cells were passaged at 80-90% confluency and incubated at 37 °C in 5% CO<sub>2</sub>. Media was changed every 3 days.

**Compound screen, cell imaging, and neurite measurements:** Cells (300 cells per well) were seeded in black, clear bottom, tissue culture-treated 384-well (Corning; 3712) plates in 40 μL of RPMI+ media. Even distribution was achieved by a quick centrifuge at 500 r.p.m. using a tabletop centrifuge (Sorvall, LegendRT) and multiwell plate adaptors shortly after seeding. Cells were then incubated for 12 h before use. 5.0 μL of compound solution in RPMI+ media were transferred into wells of 384-well plates containing PC12-ErbB4-GFP cells 30 minutes prior to treatment of 5.0 μL of Neuregulin solution (200 ng/mL in RPMI+ media). After 48 hours, images were taken using an ImageXpress Micro automated microscopy (Molecular Devices) laser-based autofocus with a Nikon 4X objective (ELWD S Fluor/0.20 NA), and an image acquisition time of 150 ms using a Xenon light source and 483/536 nm filter sets for measuring GFP fluorescence. Neurite detection and analysis were performed with MetaXpress (Molecular Devices) using the “Neurite Detection” analysis module. Cell bodies were specified as pixel blocks of

**Supporting Information, page 67**

minimum width 8  $\mu\text{m}$ , maximum area of 150  $\mu\text{m}^2$  and pixel intensities 1,000 units above local background. Neurites were specified as linear objects with maximum width 3  $\mu\text{m}$  and pixel intensities 500 units above the local background of the object being measured. Fluorescent images shown were imported as Tagged Image File Format (TIFF) files into Adobe Photoshop (San Jose, CA). Screening data were visualized in Microsoft Excel (Seattle, WA).

**Screening Data of 25 Pyridines against PC12 Cells Expressing Exogenous ErbB4**

*A live-cell high-content screening system (LC-HCS) was used; all experiments were run in duplicate:*

| entry | compound ID    | conc (uM) | Hormone           | Expt #1 | Expt #2 |
|-------|----------------|-----------|-------------------|---------|---------|
| 1     | BLG-IV-196-BF2 | 4         |                   | 6.0     | 5.2     |
| 2     | BLG-IV-196-BF2 | 4         | <i>Neuregulin</i> | 26.4    | 25.3    |
| 3     | WCB-I-116-DF2  | 4         |                   | 5.6     | 5.5     |
| 4     | WCB-I-116-DF2  | 4         | <i>Neuregulin</i> | 32.6    | 25.1    |
| 5     | WCB-I-118-BF1  | 4         |                   | 5.4     | 4.1     |
| 6     | WCB-I-118-BF1  | 4         | <i>Neuregulin</i> | 28.4    | 25.4    |
| 7     | WCB-I-118-CF2  | 4         |                   | 5.1     | 6.4     |
| 8     | WCB-I-118-CF2  | 4         | <i>Neuregulin</i> | 27.7    | 26.8    |
| 9     | WCB-I-118-EF3  | 4         |                   | 4.2     | 5.6     |
| 10    | WCB-I-118-EF3  | 4         | <i>Neuregulin</i> | 23.5    | 29.7    |
| 11    | WCB-I-119-BF   | 4         |                   | 5.9     | 5.7     |
| 12    | WCB-I-119-BF   | 4         | <i>Neuregulin</i> | 29.5    | 30.3    |
| 13    | WCB-I-119-CF   | 4         |                   | 4.6     | 3.8     |
| 14    | WCB-I-119-CF   | 4         | <i>Neuregulin</i> | 24.7    | 22.4    |
| 15    | WCB-I-119-DF   | 4         |                   | 5.0     | 4.6     |
| 16    | WCB-I-119-DF   | 4         | <i>Neuregulin</i> | 27.1    | 25.6    |
| 17    | WCB-I-119-FF   | 4         |                   | 5.0     | 5.3     |
| 18    | WCB-I-119-FF   | 4         | <i>Neuregulin</i> | 27.5    | 27.3    |
| 19    | BLG-IV-198-BF  | 4         |                   | 5.3     | 6.6     |
| 20    | BLG-IV-198-BF  | 4         | <i>Neuregulin</i> | 27.6    | 30.4    |
| 21    | BLG-IV-198-CF  | 4         |                   | 6.6     | 5.4     |
| 22    | BLG-IV-198-CF  | 4         | <i>Neuregulin</i> | 26.7    | 22.9    |
| 23    | BLG-IV-198-DF  | 4         |                   | 6.1     | 6.9     |
| 24    | BLG-IV-198-DF  | 4         | <i>Neuregulin</i> | 26.3    | 34.5    |
| 25    | BLG-IV-201-BF1 | 4         |                   | 5.7     | 4.5     |
| 26    | BLG-IV-201-BF1 | 4         | <i>Neuregulin</i> | 24.9    | 31.8    |
| 27    | BLG-IV-238-AF  | 4         |                   | 6.6     | 6.0     |
| 28    | BLG-IV-238-AF  | 4         | <i>Neuregulin</i> | 34.9    | 28.4    |
| 29    | BLG-IV-238-BF  | 4         |                   | 4.3     | 4.8     |
| 30    | BLG-IV-238-BF  | 4         | <i>Neuregulin</i> | 30.0    | 31.8    |
| 31    | BLG-IV-238-CF  | 4         |                   | 4.4     | 4.7     |
| 32    | BLG-IV-238-CF  | 4         | <i>Neuregulin</i> | 31.8    | 29.6    |
| 33    | WCB-I-121-BF   | 4         |                   | 4.8     | 4.1     |
| 34    | WCB-I-121-BF   | 4         | <i>Neuregulin</i> | 27.3    | 30.7    |
| 35    | BLG-IV-237-F   | 4         |                   | 3.4     | 2.6     |
| 36    | BLG-IV-237-F   | 4         | <i>Neuregulin</i> | 7.3     | 6.6     |
| 37    | BLG-IV-240-BF  | 4         |                   | 3.9     | 3.2     |
| 38    | BLG-IV-240-BF  | 4         | <i>Neuregulin</i> | 11.9    | 25.8    |
| 39    | WCB-I-127-EF   | 4         |                   | 3.7     | 4.1     |
| 40    | WCB-I-127-EF   | 4         | <i>Neuregulin</i> | 35.3    | 27.6    |
| 41    | BLG-IV-195-AF2 | 4         |                   | 3.9     | 4.4     |
| 42    | BLG-IV-195-AF2 | 4         | <i>Neuregulin</i> | 28.0    | 29.6    |
| 43    | BLG-IV-195-DF2 | 4         |                   | 4.8     | 4.7     |

Supporting Information, page 68

|    |                |    |                   |      |      |
|----|----------------|----|-------------------|------|------|
| 44 | BLG-IV-195-DF2 | 4  | <i>Neuregulin</i> | 31.2 | 21.4 |
| 45 | BLG-IV-195-EF2 | 4  |                   | 4.8  | 5.3  |
| 46 | BLG-IV-195-EF2 | 4  | <i>Neuregulin</i> | 24.0 | 34.7 |
| 47 | BLG-IV-196-AF2 | 4  |                   | 4.5  | 6.7  |
| 48 | BLG-IV-196-AF2 | 4  | <i>Neuregulin</i> | 27.6 | 35.2 |
| 49 | BLG-IV-196-BF2 | 20 |                   | 5.2  | 5.7  |
| 50 | BLG-IV-196-BF2 | 20 | <i>Neuregulin</i> | 27.3 | 32.6 |
| 51 | WCB-I-116-DF2  | 20 |                   | 6.4  | 4.0  |
| 52 | WCB-I-116-DF2  | 20 | <i>Neuregulin</i> | 25.7 | 24.4 |
| 53 | WCB-I-118-BF1  | 20 |                   | 3.4  | 3.7  |
| 54 | WCB-I-118-BF1  | 20 | <i>Neuregulin</i> | 26.3 | 26.1 |
| 55 | WCB-I-118-CF2  | 20 |                   | 4.1  | 2.4  |
| 56 | WCB-I-118-CF2  | 20 | <i>Neuregulin</i> | 34.9 | 22.8 |
| 57 | WCB-I-118-EF3  | 20 |                   | 3.7  | 3.1  |
| 58 | WCB-I-118-EF3  | 20 | <i>Neuregulin</i> | 27.6 | 27.8 |
| 59 | WCB-I-119-BF   | 20 |                   | 3.3  | 4.6  |
| 60 | WCB-I-119-BF   | 20 | <i>Neuregulin</i> | 28.2 | 26.0 |
| 61 | WCB-I-119-CF   | 20 |                   | 52.2 | 4.8  |
| 62 | WCB-I-119-CF   | 20 | <i>Neuregulin</i> | 29.6 | 33.6 |
| 63 | WCB-I-119-DF   | 20 |                   | 3.6  | 3.2  |
| 64 | WCB-I-119-DF   | 20 | <i>Neuregulin</i> | 25.2 | 24.0 |
| 65 | WCB-I-119-FF   | 20 |                   | 5.1  | 3.6  |
| 66 | WCB-I-119-FF   | 20 | <i>Neuregulin</i> | 28.4 | 27.1 |
| 67 | BLG-IV-198-BF  | 20 |                   | 3.2  | 4.5  |
| 68 | BLG-IV-198-BF  | 20 | <i>Neuregulin</i> | 25.4 | 25.0 |
| 69 | BLG-IV-198-CF  | 20 |                   | 5.3  | 4.6  |
| 70 | BLG-IV-198-CF  | 20 | <i>Neuregulin</i> | 27.9 | 37.0 |
| 71 | BLG-IV-198-DF  | 20 |                   | 3.4  | 4.3  |
| 72 | BLG-IV-198-DF  | 20 | <i>Neuregulin</i> | 16.3 | 42.8 |
| 73 | BLG-IV-201-BF1 | 20 |                   | 5.3  | 5.9  |
| 74 | BLG-IV-201-BF1 | 20 | <i>Neuregulin</i> | 30.0 | 46.3 |
| 75 | BLG-IV-238-AF  | 20 |                   | 4.7  | 4.3  |
| 76 | BLG-IV-238-AF  | 20 | <i>Neuregulin</i> | 29.5 | 57.2 |
| 77 | BLG-IV-238-BF  | 20 |                   | 4.4  | 4.2  |
| 78 | BLG-IV-238-BF  | 20 | <i>Neuregulin</i> | 36.1 | 54.9 |
| 79 | BLG-IV-238-CF  | 20 |                   | 4.0  | 4.9  |
| 80 | BLG-IV-238-CF  | 20 | <i>Neuregulin</i> | 26.2 | 50.3 |
| 81 | WCB-I-121-BF   | 20 |                   | 4.0  | 3.6  |
| 82 | WCB-I-121-BF   | 20 | <i>Neuregulin</i> | 27.4 | 55.8 |
| 83 | BLG-IV-237-F   | 20 |                   | 4.2  | 3.2  |
| 84 | BLG-IV-237-F   | 20 | <i>Neuregulin</i> | 7.9  | 9.2  |
| 85 | BLG-IV-240-BF  | 20 |                   | 4.3  | 4.4  |
| 86 | BLG-IV-240-BF  | 20 | <i>Neuregulin</i> | 24.9 | 49.0 |
| 87 | WCB-I-127-EF   | 20 |                   | 3.3  | 4.6  |
| 88 | WCB-I-127-EF   | 20 | <i>Neuregulin</i> | 30.2 | 45.7 |
| 89 | BLG-IV-195-AF2 | 20 |                   | 4.6  | 3.3  |
| 90 | BLG-IV-195-AF2 | 20 | <i>Neuregulin</i> | 28.4 | 53.0 |
| 91 | BLG-IV-195-DF2 | 20 |                   | 2.3  | 5.4  |
| 92 | BLG-IV-195-DF2 | 20 | <i>Neuregulin</i> | 24.6 | 43.9 |
| 93 | BLG-IV-195-EF2 | 20 |                   | 4.6  | 4.6  |
| 94 | BLG-IV-195-EF2 | 20 | <i>Neuregulin</i> | 29.9 | 59.5 |
| 95 | BLG-IV-196-AF2 | 20 |                   | 3.4  | 4.3  |
| 96 | BLG-IV-196-AF2 | 20 | <i>Neuregulin</i> | 16.3 | 42.8 |

**Supporting Information, page 69**

|     |                |    |                   |      |      |
|-----|----------------|----|-------------------|------|------|
| 97  | WCB-I-124-CF1  | 4  |                   | 4.7  | 4.4  |
| 98  | WCB-I-124-CF1  | 4  | <i>Neuregulin</i> | 32.2 | 39.3 |
| 99  | WCB-I-125-AF   | 4  |                   | 6.4  | 5.9  |
| 100 | WCB-I-125-AF   | 4  | <i>Neuregulin</i> | 30.3 | 27.1 |
| 101 | BLG-IV-202-DF1 | 4  |                   | 5.8  | 5.4  |
| 102 | BLG-IV-202-DF1 | 4  | <i>Neuregulin</i> | 30.6 | 35.3 |
| 103 | WCB-I-124-A2F1 | 4  |                   | 4.1  | 5.8  |
| 104 | WCB-I-124-A2F1 | 4  | <i>Neuregulin</i> | 22.1 | 20.2 |
| 105 | BLG-IV-198-AF  | 4  |                   | 4.6  | 3.7  |
| 106 | BLG-IV-198-AF  | 4  | <i>Neuregulin</i> | 27.7 | 19.8 |
| 107 | WCB-I-124-CF1  | 20 |                   | 3.9  | 6.9  |
| 108 | WCB-I-124-CF1  | 20 | <i>Neuregulin</i> | 29.7 | 26.2 |
| 109 | WCB-I-125-AF   | 20 |                   | 4.8  | 4.1  |
| 110 | WCB-I-125-AF   | 20 | <i>Neuregulin</i> | 29.2 | 34.1 |
| 111 | BLG-IV-202-DF1 | 20 |                   | 4.1  | 4.0  |
| 112 | BLG-IV-202-DF1 | 20 | <i>Neuregulin</i> | 34.8 | 18.6 |
| 113 | WCB-I-124-A2F1 | 20 |                   | 15.4 | 6.0  |
| 114 | WCB-I-124-A2F1 | 20 | <i>Neuregulin</i> | 26.5 | 21.9 |
| 115 | BLG-IV-198-AF  | 20 |                   | 4.1  | 4.0  |
| 116 | BLG-IV-198-AF  | 20 | <i>Neuregulin</i> | 23.2 | 26.0 |

**Supporting Information, page 70**

**Structures of compounds screened against PC12 Cells Expressing Exogenous ErbB4**

*A live-cell high-content screening system (LC-HCS) was used; all experiments were run in duplicate:*

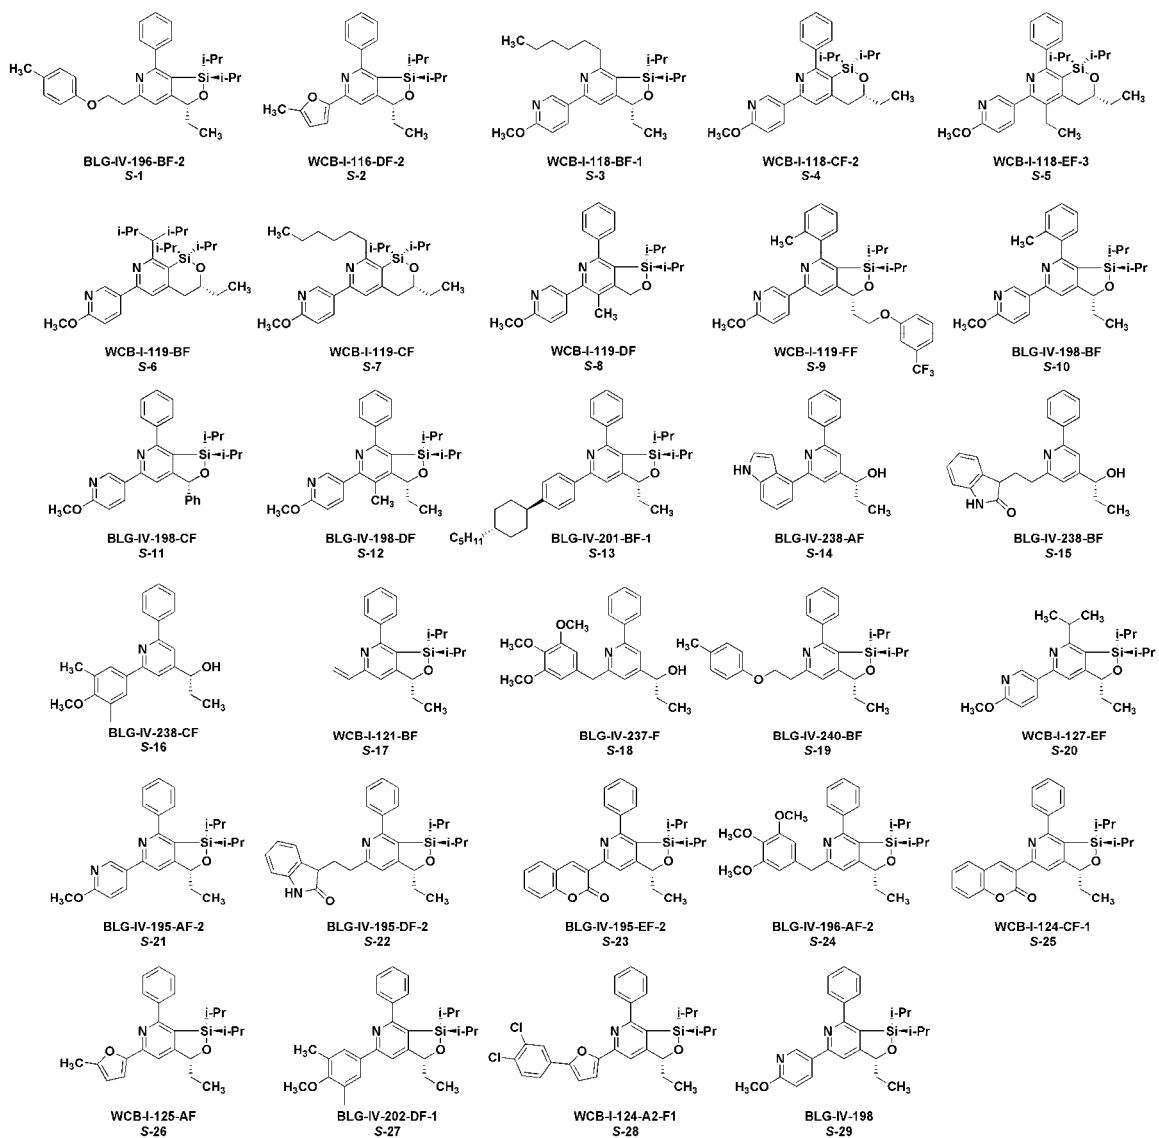

**Dose response curve for the compound with the highest inhibitory activity**

*Pyridine 52 (manuscript); compound BLG-IV-237F (S-18) in supporting information:*

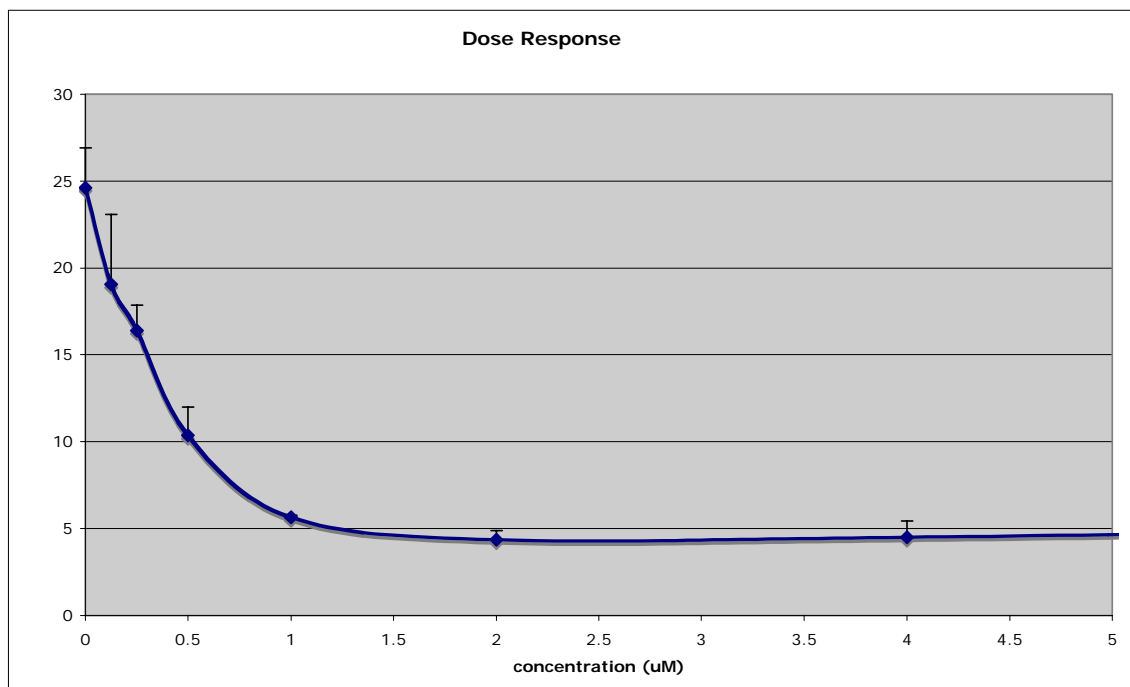

***Additional References:***

- [3] (e) Tekavee, T. N.; Zuo, G.; Simon, K.; Louie, J. *J. Org. Chem.* **2006**, *71*, 5834. (f) Tenaka, K.; Suzuki, N.; Nishida, G. *Eur. J. Org. Chem.* **2006**, 3917. (g) McCornick, M. M.; Duong, H. A.; Zuo, G.; Louie, J. *J. Am. Chem. Soc.* **2005**, *127*, 5030. (h) Bonaga, L. V. R.; Zhang, H-C.; Moretto, A. F.; Ye, H.; Gauthier, J.; Li, J.; Leo, G. C.; Maryanoff, B. E. *J. Am. Chem. Soc.* **2005**, *127*, 3473-3485. (i) Petit, M.; Aubert, C.; Malacria, M. *Org. Lett.* **2004**, *6*, 3937-3940. (j) Hoshi, T.; Katano, M.; Nozawa, E.; Suzuki, T.; Hagiwara, H. *Tetrahedron Lett.* **2004**, *45*, 3489-3491. (k) Chouraqui, G.; Petit, M.; Aubert, C.; Malacria, M. *Org. Lett.* **2004**, *6*, 1519-1521.
